# Supplementary material for: Investigation of the Passerini and Ugi reactions in β-lactam aldehydes. Synthetic applications
Source: Royal Society of Chemistry journal article supplement (doi:10.1039/c4ob02289k), 2014-11-24
Supplement: c4ob02289k1.pdf [file c4ob02289k1.pdf]

## Supporting Information for the Paper

### Investigation of the Passerini and Ugi Reactions in $\beta$ -Lactam

#### Aldehydes. Synthetic Applications

Benito Alcaide,<sup>\*,a</sup> Pedro Almendros,<sup>b</sup> Cristina Aragoncillo,<sup>a</sup> Ricardo Callejo,<sup>a</sup> M. Pilar Ruiz<sup>a</sup> and M. Rosario Torres<sup>c</sup>

<sup>a</sup>*Grupo de Lactamas y Heterociclos Bioactivos, Departamento de Química Orgánica I, Unidad Asociada al CSIC, Facultad de Química, Universidad Complutense de Madrid, 28040-Madrid, Spain*

<sup>b</sup>*Instituto de Química Orgánica General, IQOG-CSIC, Juan de la Cierva 3, 28006-Madrid, Spain*

<sup>c</sup>*CAI Difracción de Rayos X, Facultad de Química, Universidad Complutense de Madrid, 28040-Madrid, Spain*

Email: alcaideb@quim.ucm.es

#### Table of Contents

|                                                                                                                                         |    |
|-----------------------------------------------------------------------------------------------------------------------------------------|----|
| Preparation and Characterization of P-3CR Adducts <b>2b-h</b>                                                                           | 2  |
| Preparation and Characterization of U-4CR Adducts <b>3a-h</b> and <b>3j-m</b>                                                           | 8  |
| Figure S1. Observed NOE for compounds <b>5</b>                                                                                          | 19 |
| Table S1. Representative chemical shifts and vicinal coupling constants of <sup>1</sup> H and <sup>13</sup> C NMR of compounds <b>2</b> | 20 |
| Table S2. Representative chemical shifts and vicinal coupling constants of <sup>1</sup> H and <sup>13</sup> C NMR of compounds <b>3</b> | 21 |

|                                                                                                                           |    |
|---------------------------------------------------------------------------------------------------------------------------|----|
| <sup>1</sup> H NMR in (CDCl <sub>2</sub> ) <sub>2</sub> of compound <i>syn</i> -(+)- <b>3a</b> at different temperatures  | 22 |
| <sup>1</sup> H NMR in (CDCl <sub>2</sub> ) <sub>2</sub> of compound <i>anti</i> -(+)- <b>3b</b> at different temperatures | 23 |
| <sup>1</sup> H and <sup>13</sup> C NMR spectra for all new compounds                                                      | 24 |
| X-Ray data for compound <i>anti</i> -(+)- <b>2d</b>                                                                       | 67 |

## PREPARATION AND CHARACTERIZATION OF COMPOUNDS **2b-h**

**Passerini adduct 2b. Method A.** From 37 mg (0.10 mmol) of aldehyde (+)-**1b**, compound **2b** was obtained as a mixture of isomers in a *syn/anti* ratio (65:35). After flash chromatography using *n*-hexane/ethyl acetate (3:1) as eluent, the less polar compound *syn*-(+)-**2b** (31 mg, 56%) and the more polar compound *anti*-(+)-**2b** (17 mg, 32%) were obtained. ***syn*-(+)-2b.** White solid; mp 148–149°C (*n*-hexane/ethyl acetate); [ $\alpha$ ]<sub>D</sub> +110.2 (c 0.9, CHCl<sub>3</sub>); <sup>1</sup>H NMR (300 MHz, CDCl<sub>3</sub>, 25°C)  $\delta$  7.97-7.95 (m, 2H), 7.57 (tt, *J* = 7.4, 1.5 Hz, 1H), 7.50 (AA'XX', 2H), 7.42 (t, *J* = 7.6 Hz, 2H), 7.28-7.22 (m, 5H), 7.03-6.92 (m, 5H), 6.84 (AA'XX', 2H), 6.37 (t, *J* = 5.7 Hz, 1H), 5.95 (d, *J* = 2.0 Hz, 1H), 5.52 (d, *J* = 5.3 Hz, 1H), 5.40 (dd, *J* = 5.3, 2.2 Hz, 1H), 4.37 (dd, *J* = 14.9, 5.7 Hz, 1H), 4.26 (dd, *J* = 14.9, 5.8 Hz, 1H), 3.78 (s, 3H); <sup>13</sup>C NMR (75 MHz, CDCl<sub>3</sub>, 25°C)  $\delta$  168.1, 165.0, 163.2, 157.1, 156.9, 136.7, 133.8, 130.0, 129.6, 128.65, 128.61, 127.6, 122.6, 119.8, 115.5, 114.5, 79.5, 69.8, 58.0, 55.4, 43.5; IR (KBr, cm<sup>-1</sup>)  $\nu$  3369, 1749, 1668; HRMS (ESI) calcd for C<sub>32</sub>H<sub>29</sub>N<sub>2</sub>O<sub>6</sub><sup>+</sup> [*M*+*H*]<sup>+</sup>: 537.2020; found: 537.2000. ***anti*-(+)-2b.** White solid; mp 147–148°C (*n*-hexane/ethyl acetate); [ $\alpha$ ]<sub>D</sub> +91.3 (c 0.3, CHCl<sub>3</sub>); <sup>1</sup>H NMR (300 MHz, CDCl<sub>3</sub>, 25°C)  $\delta$  8.03-8.00 (m, 2H), 7.59 (tt, *J* = 7.5, 1.4 Hz, 1H), 7.44 (t, *J* = 7.7 Hz, 2H), 7.35 (AA'XX', 2H), 7.35-7.30 (m, 2H), 7.24-7.22 (m, 3H), 7.09-7.00 (m, 5H), 6.85 (AA'XX', 2H), 6.47 (t, *J* = 5.7 Hz, 1H), 6.29 (d, *J* = 3.2 Hz, 1H), 5.54 (d, *J* = 5.1 Hz, 1H), 5.27 (dd, *J* = 5.0, 3.3 Hz, 1H), 4.36 (dd, *J* = 14.8, 6.4 Hz, 1H), 3.88 (dd, *J* = 14.8, 5.0 Hz, 1H), 3.78 (s, 3H); <sup>13</sup>C NMR (75 MHz, CDCl<sub>3</sub>, 25°C)  $\delta$  166.9,

164.8, 162.8, 157.7, 156.9, 136.9, 133.9, 130.0, 129.8, 129.5, 128.74, 128.69, 128.3, 127.7, 127.6, 122.8, 118.9, 115.7, 114.6, 80.1, 68.7, 58.6, 55.4, 43.3; IR (KBr,  $\text{cm}^{-1}$ )  $\nu$  3375, 1756, 1666; HRMS (ESI) calcd for  $\text{C}_{32}\text{H}_{29}\text{N}_2\text{O}_6^+$   $[M+H]^+$ : 537.2020; found: 537.2022.

**Passerini adduct 2c. Method A.** From 60 mg (0.26 mmol) of aldehyde (+)-**1c**, compound **2c** was obtained as a mixture of isomers in a *syn/anti* ratio (72:28). After flash chromatography using *n*-hexane/ethyl acetate (1:1) as eluent, an inseparable mixture of isomers (80 mg, 65%) was obtained as a colorless oil. **syn-2c.**  $^1\text{H}$  NMR (300 MHz,  $\text{CDCl}_3$ ,  $25^\circ\text{C}$ )  $\delta$  8.11-8.08 (m, 2H); 7.64-7.59 (m, 1H), 7.50-7.43 (m, 2H), 7.33-7.20 (m, 7H), 7.05-6.94 (m, 1H), 6.94-6.87 (m, 2H), 6.69 (t,  $J = 5.4$  Hz, 1H), 5.81 (d,  $J = 5.1$  Hz, 1H), 5.41 (d,  $J = 5.1$  Hz, 1H), 4.91 (t,  $J = 5.0$  Hz, 1H), 4.51-4.40 (m, 2H), 4.32 (dd,  $J = 17.8, 2.6$  Hz, 1H), 3.92 (dd,  $J = 17.7, 2.4$  Hz, 1H), 2.30 (t,  $J = 2.5$  Hz, 1H);  $^{13}\text{C}$  NMR (75 MHz,  $\text{CDCl}_3$ ,  $25^\circ\text{C}$ )  $\delta$  166.9, 165.7, 165.2, 157.0, 137.2, 133.9, 130.0, 129.6, 128.74, 128.68, 128.6, 127.8, 127.7, 122.6, 115.6, 80.5, 76.3, 73.2, 71.6, 57.5, 43.6, 31.1; HRMS (ESI) calcd for  $\text{C}_{28}\text{H}_{25}\text{N}_2\text{O}_5^+$   $[M+H]^+$ : 469.1758; found: 469.1776. **anti-2c.**  $^1\text{H}$  NMR (300 MHz,  $\text{CDCl}_3$ ,  $25^\circ\text{C}$ )  $\delta$  8.07-8.04 (m, 2H), 7.64-7.59 (m, 1H), 7.50-7.43 (m, 2H), 7.33-7.20 (m, 7H), 7.14-7.11 (m, 2H), 7.05-6.94 (m, 1H), 6.53 (t,  $J = 5.4$  Hz, 1H), 6.09 (d,  $J = 4.0$  Hz, 1H), 5.43 (d,  $J = 5.0$  Hz, 1H), 4.93 (dd,  $J = 4.9, 3.9$  Hz, 1H), 4.45-4.40 (m, 1H), 4.29 (dd,  $J = 17.8, 2.6$  Hz, 1H), 4.02 (dd,  $J = 14.8, 5.3$  Hz, 1H), 3.86 (dd,  $J = 17.8, 2.5$  Hz, 1H), 2.31 (t,  $J = 2.3$  Hz, 1H);  $^{13}\text{C}$  NMR (75 MHz,  $\text{CDCl}_3$ ,  $25^\circ\text{C}$ )  $\delta$ : 166.7, 165.3, 165.2, 157.4, 137.0, 134.0, 130.0, 129.7, 128.74, 128.7, 128.68, 127.7, 127.6, 122.6, 115.5, 80.8, 75.8, 73.6, 69.7, 58.1, 43.3, 30.4.

**Passerini adduct 2d. Method A.** From 52 mg (0.22 mmol) of aldehyde (+)-**1a**, compound **2d** was obtained as a mixture of isomers in a *syn/anti* ratio (60:40). After flash chromatography using *n*-hexane/ethyl acetate (1:1) as eluent, the less polar

compound *syn*-(+)-**2d** (46 mg, 51%) and the more polar compound *anti*-(+)-**2d** (30 mg, 33%) were obtained. ***syn*-(+)-2d**. Colorless oil;  $[\alpha]_D +106.1$  (c 0.7, CHCl<sub>3</sub>); <sup>1</sup>H NMR (300 MHz, CDCl<sub>3</sub>, 25°C)  $\delta$  7.39 (AA'XX', 2H), 7.30-7.26 (m, 3H), 7.08-7.05 (m, 2H), 6.82 (AA'XX', 2H), 6.45 (bs, 1H), 5.56 (d,  $J = 4.5$  Hz, 1H), 4.97 (t,  $J = 4.8$  Hz, 1H), 4.66 (d,  $J = 5.3$  Hz, 1H), 4.43 (dd,  $J = 14.8, 5.8$  Hz, 1H), 4.25 (dd,  $J = 14.9, 5.6$  Hz, 1H), 3.77 (s, 3H), 3.52 (s, 3H), 1.99 (s, 3H); <sup>13</sup>C NMR (75 MHz, CDCl<sub>3</sub>, 25°C)  $\delta$  169.6, 167.7, 164.4, 156.7, 137.0, 130.1, 128.6, 127.62, 127.56, 119.7, 114.1, 82.7, 70.5, 59.8, 57.3, 55.4, 43.4, 20.7; IR (CHCl<sub>3</sub>, cm<sup>-1</sup>)  $\nu$  3347, 1750, 1668; HRMS (ESI) calcd for C<sub>22</sub>H<sub>25</sub>N<sub>2</sub>O<sub>6</sub><sup>+</sup>  $[M+H]^+$ : 413.1707; found: 413.1713. ***anti*-(+)-2d**. White solid; mp 179–181°C (*n*-hexane/ethyl acetate);  $[\alpha]_D +31.3$  (c 0.2, CHCl<sub>3</sub>); <sup>1</sup>H NMR (300 MHz, CDCl<sub>3</sub>, 25°C)  $\delta$  7.37 (AA'XX', 2H), 7.34-7.27 (m, 3H), 7.20-7.18 (m, 2H), 6.87 (AA'XX', 2H), 6.61 (t,  $J = 5.3$  Hz, 1H), 5.78 (d,  $J = 3.7$  Hz, 1H), 4.80 (dd,  $J = 5.1, 3.8$  Hz, 1H), 4.67 (d,  $J = 5.1$  Hz, 1H), 4.64 (dd,  $J = 14.7, 5.9$  Hz, 1H), 4.27 (dd,  $J = 14.8, 5.4$  Hz, 1H), 3.78 (s, 3H), 3.48 (s, 3H), 2.10 (s, 3H); <sup>13</sup>C NMR (75 MHz, CDCl<sub>3</sub>, 25°C)  $\delta$ : 169.2, 166.9, 164.4, 156.6, 137.3, 130.0, 128.7, 127.8, 127.6, 118.6, 114.4, 83.0, 69.0, 60.0, 58.1, 55.4, 43.4, 20.6. IR (KBr, cm<sup>-1</sup>)  $\nu$  3330, 1752, 1666; HRMS (ESI) calcd for C<sub>22</sub>H<sub>25</sub>N<sub>2</sub>O<sub>6</sub><sup>+</sup>  $[M+H]^+$ : 413.1707; found: 413.1709.

**Passerini adduct 2e. Method A.** From 59 mg (0.25 mmol) of aldehyde (+)-**1a**, compound **2e** was obtained as a mixture of isomers in a *syn/anti* ratio (60:40). After flash chromatography using *n*-hexane/ethyl acetate (1:1) as eluent, the less polar compound *syn*-(+)-**2e** (50 mg, 53%) and the more polar compound *anti*-(+)-**2e** (33 mg, 35%) were obtained. ***syn*-(+)-2e**. Colorless oil;  $[\alpha]_D +77.9$  (c 0.7, CHCl<sub>3</sub>); <sup>1</sup>H NMR (300 MHz, CDCl<sub>3</sub>, 25°C)  $\delta$  7.42 (AA'XX', 2H), 6.85 (AA'XX', 2H), 5.94 (bs, 1H), 5.39 (d,  $J = 5.1$  Hz, 1H), 4.92 (t,  $J = 5.1$  Hz, 1H), 4.67 (d,  $J = 5.1$  Hz, 1H), 3.79 (s, 3H), 3.59 (s, 3H), 1.99 (s, 3H), 1.29 (s, 9H); <sup>13</sup>C NMR (75 MHz, CDCl<sub>3</sub>, 25°C)  $\delta$  169.6, 166.5, 164.5,

156.7, 130.3, 119.9, 114.1, 82.7, 71.3, 59.8, 57.2, 55.4, 51.5, 28.4, 20.6. IR (CHCl<sub>3</sub>, cm<sup>-1</sup>)  $\nu$  3360, 1753, 1677; HRMS (ESI) calcd for C<sub>19</sub>H<sub>27</sub>N<sub>2</sub>O<sub>6</sub><sup>+</sup> [M+H]<sup>+</sup>: 379.1864; found: 379.1875. **anti-(+)-2e**. Colorless oil; [ $\alpha$ ]<sub>D</sub> +86.3 (c 0.3, CHCl<sub>3</sub>); <sup>1</sup>H NMR (300 MHz, CDCl<sub>3</sub>, 25°C)  $\delta$  7.41 (AA'XX', 2H), 6.86 (AA'XX', 2H), 6.23 (bs, 1H), 5.55 (d, *J* = 2.3 Hz, 1H), 4.71 (d, *J* = 5.4 Hz, 1H), 4.66 (dd, *J* = 5.4, 2.3 Hz, 1H), 3.78 (s, 3H), 3.69 (s, 3H), 2.17 (s, 3H), 1.27 (s, 9H); <sup>13</sup>C NMR (75 MHz, CDCl<sub>3</sub>, 25°C)  $\delta$  169.4, 164.8, 164.2, 156.6, 130.3, 118.7, 114.3, 82.6, 69.8, 60.0, 58.7, 55.4, 51.4, 28.4, 20.7; IR (CHCl<sub>3</sub>, cm<sup>-1</sup>)  $\nu$  = 3355, 1752, 1695; HRMS (ESI) calcd for C<sub>19</sub>H<sub>27</sub>N<sub>2</sub>O<sub>6</sub><sup>+</sup> [M+H]<sup>+</sup>: 379.1864; found: 379.1868.

**Passerini adduct 2f. Method A.** From 46 mg (0.20 mmol) of aldehyde (-)-**1d**, compound **2f** was obtained as a mixture of isomers in a *syn/anti* ratio (73:27). After flash chromatography using *n*-hexane/ethyl acetate (1:1) as eluent, an inseparable mixture of isomers (68 mg, 61%) was obtained as a colorless oil. **syn-2f**. <sup>1</sup>H NMR (300 MHz, CDCl<sub>3</sub>, 25°C)  $\delta$  7.98 (dd, *J* = 7.9, 0.9 Hz, 1H), 7.77 (dd, *J* = 7.8, 1.7 Hz, 1H), 7.41 (td, *J* = 7.6, 1.1 Hz, 1H), 7.29-7.23 (m, 2H), 7.19 (td, *J* = 7.7, 1.6 Hz, 1H), 7.08-6.97 (m, 3H), 6.23 (bs, 1H), 5.85-5.70 (m, 1H), 5.70 (d, *J* = 3.2 Hz, 1H), 5.39 (d, *J* = 5.1 Hz, 1H), 5.23-5.16 (m, 2H), 4.78 (dd, *J* = 5.0, 3.2 Hz, 1H), 4.21-4.11 (m, 1H), 3.68 (dd, *J* = 15.7, 6.5 Hz, 1H), 1.36 (s, 9H); <sup>13</sup>C NMR (75 MHz, CDCl<sub>3</sub>, 25°C)  $\delta$  166.0, 165.8, 165.7, 157.1, 140.9, 134.7, 133.1, 130.9, 130.8, 129.6, 128.4, 122.6, 118.9, 115.5, 93.8, 80.1, 71.5, 57.3, 51.9, 44.0, 28.5; HRMS (ESI) calcd for C<sub>25</sub>H<sub>28</sub>IN<sub>2</sub>O<sub>5</sub><sup>+</sup> [M+H]<sup>+</sup>: 563.1037; found: 563.1017. **anti-2f**. <sup>1</sup>H NMR (300 MHz, CDCl<sub>3</sub>, 25°C)  $\delta$  8.00 (dd, *J* = 7.9, 0.9 Hz, 1H), 7.87 (dd, *J* = 7.8, 1.7 Hz, 1H), 7.40 (td, *J* = 7.6, 1.1 Hz, 1H), 7.29-7.23 (m, 3H), 7.08-6.97 (m, 3H), 6.30 (bs, 1H), 5.85-5.70 (m, 1H), 5.73 (d, *J* = 3.9 Hz, 1H), 5.42 (d, *J* = 5.0 Hz, 1H), 5.34-5.25 (m, 2H), 4.66 (dd, *J* = 4.8, 4.1 Hz, 1H), 4.21-4.11 (m, 1H), 3.68 (dd, *J* = 15.7, 6.5 Hz, 1H), 1.28 (s, 9H); <sup>13</sup>C NMR (75 MHz, CDCl<sub>3</sub>, 25°C)  $\delta$ : 166.0, 165.7,

165.1, 157.1, 141.4, 134.7, 133.3, 131.5, 130.6, 129.7, 128.2, 122.6, 119.7, 115.5, 94.4, 80.2, 71.3, 57.7, 51.8, 43.6, 28.4.

**Passerini adduct 2g. Method A.** From 35 mg (0.15 mmol) of aldehyde (–)-**1d**, compound **2g** was obtained as a mixture of isomers in a *syn/anti* ratio (77:23). After flash chromatography using *n*-hexane/ethyl acetate (1:1) as eluent, the less polar compound *anti*-(–)-**2g** (14 mg, 17%) and the more polar compound *syn*-(–)-**2g** (46 mg, 55%) were obtained. *syn*-(–)-**2g**. White solid; mp 165–166°C (*n*-hexane/ethyl acetate);  $[\alpha]_D -4.6$  (c 1.5, CHCl<sub>3</sub>); <sup>1</sup>H NMR (300 MHz, CDCl<sub>3</sub>, 25°C)  $\delta$  7.92 (AA'BB', 2H), 7.78 (AA'BB', 2H), 7.33-7.28 (m, 2H), 7.10 (t, *J* = 5.5 Hz, 1H), 7.06-7.01 (m, 3H), 5.74-5.61 (m, 1H), 5.64 (d, *J* = 2.3 Hz, 1H), 5.28 (d, *J* = 5.0 Hz, 1H), 5.18-5.12 (m, 2H), 4.66 (dd, *J* = 5.0, 2.3 Hz, 1H), 4.60 (d, *J* = 17.4 Hz, 1H), 4.54 (d, *J* = 17.2 Hz, 1H), 4.24 (q, *J* = 7.2 Hz, 2H), 4.23 (dd, *J* = 18.0, 6.4 Hz, 1H), 3.91 (dd, *J* = 17.8, 4.9 Hz, 1H), 3.94-3.87 (m, 1H), 3.63 (dd, *J* = 15.6, 6.9 Hz, 1H), 1.31 (t, *J* = 7.1 Hz, 3H); <sup>13</sup>C NMR (75 MHz, CDCl<sub>3</sub>, 25°C)  $\delta$  168.9, 167.4, 167.2, 165.9, 165.3, 157.1, 134.4, 131.8, 130.8, 129.6, 123.8, 122.6, 119.0, 115.5, 80.2, 70.3, 61.6, 57.2, 43.3, 41.2, 39.2, 14.1; IR (KBr, cm<sup>-1</sup>)  $\nu$  3372, 1760, 1721, 1684; HRMS (ESI) calcd for C<sub>28</sub>H<sub>28</sub>N<sub>3</sub>O<sub>9</sub><sup>+</sup> [*M*+*H*]<sup>+</sup>: 550.1820; found: 550.1810. *anti*-(–)-**2g**. White solid; mp 159–161°C (*n*-hexane/ethyl acetate);  $[\alpha]_D -16.2$  (c 0.5, CHCl<sub>3</sub>); <sup>1</sup>H NMR (300 MHz, CDCl<sub>3</sub>, 25°C)  $\delta$  7.69 (AA'BB', 2H), 7.54 (AA'BB', 2H), 7.19-7.14 (m, 2H), 6.98-6.93 (m, 2H), 6.76-6.73 (m, 2H), 5.79 (d, *J* = 3.5 Hz, 1H), 5.82-5.68 (m, 1H), 5.31-5.25 (m, 2H), 5.09 (d, *J* = 5.0 Hz, 1H), 4.66 (d, *J* = 17.5 Hz, 1H), 4.53 (dd, *J* = 4.9, 3.7 Hz, 1H), 4.52 (d, *J* = 17.7 Hz, 1H), 4.24 (q, *J* = 7.1 Hz, 2H), 4.08 (ddt, *J* = 15.4, 5.8, 1.4 Hz, 1H), 4.02 (dd, *J* = 18.3, 5.8 Hz, 1H), 3.68 (dd, *J* = 18.1, 4.7 Hz, 1H), 3.58 (dd, *J* = 15.4, 7.1 Hz, 1H), 1.30 (t, *J* = 7.2 Hz, 3H); <sup>13</sup>C NMR (75 MHz, CDCl<sub>3</sub>, 25°C)  $\delta$  168.7, 167.5, 166.3, 165.9, 165.2, 157.3, 134.0, 131.5, 130.6, 129.3, 123.6, 122.3, 120.1, 115.6, 80.7, 69.7, 61.6, 57.3, 43.4, 41.2, 38.9, 14.1; IR (KBr,

$\text{cm}^{-1}$ )  $\nu$  3384, 1760, 1721, 1682; HRMS (ESI) calcd for  $\text{C}_{28}\text{H}_{28}\text{N}_3\text{O}_9^+$   $[M+H]^+$ : 550.1820; found: 550.1845.

**Passerini adduct 2h. Method A.** From 56 mg (0.24 mmol) of aldehyde (+)-**1a**, compound **2h** was obtained as a mixture of isomers in a *syn/anti* ratio (68:32). After flash chromatography using *n*-hexane/ethyl acetate (1:1) as eluent, the less polar compound *syn*-(+)-**2h** (69 mg, 58%) and the more polar compound *anti*-(+)-**2h** (32 mg, 28%) were obtained. **Method B.** From 30 mg (0.13 mmol) of aldehyde (+)-**1a**, compound **2h** was obtained as a mixture of isomers in a *syn/anti* ratio (63:37). After flash chromatography using *n*-hexane/ethyl acetate (1:1) as eluent, the less polar compound *syn*-(+)-**2h** (36 mg, 56%) and the more polar compound *anti*-(+)-**2h** (21 mg, 33%) were obtained. ***syn*-(+)-2h.** Colorless oil;  $[\alpha]_{\text{D}} +65.6$  (c 1.0,  $\text{CHCl}_3$ );  $^1\text{H}$  NMR (300 MHz,  $\text{CDCl}_3$ ,  $25^\circ\text{C}$ )  $\delta$  7.71 (AA'BB', 2H), 7.36 (AA'BB', 2H), 7.29 (AA'XX', 2H), 7.16 (dd,  $J = 8.2, 5.1$  Hz, 1H), 6.82 (AA'XX', 2H), 5.41 (d,  $J = 5.0$  Hz, 1H), 4.88 (dd,  $J = 14.0, 8.5$  Hz, 1H), 4.65 (d,  $J = 5.1$  Hz, 1H), 4.62 (t,  $J = 5.1$  Hz, 1H), 4.17 (dd,  $J = 14.0, 5.1$  Hz, 1H), 3.77 (s, 3H), 3.61 (s, 3H), 2.45 (s, 3H), 1.94 (s, 3H);  $^{13}\text{C}$  NMR (75 MHz,  $\text{CDCl}_3$ ,  $25^\circ\text{C}$ )  $\delta$  169.3, 167.5, 164.0, 156.8, 145.6, 133.6, 130.0, 129.9, 128.7, 119.8, 114.1, 82.3, 70.3, 59.8, 59.7, 56.8, 55.4, 21.7, 20.4; IR ( $\text{CHCl}_3$ ,  $\text{cm}^{-1}$ )  $\nu$  3333, 1752, 1696; HRMS (ESI) calcd for  $\text{C}_{23}\text{H}_{26}\text{N}_2\text{NaO}_8\text{S}^+$   $[M+Na]^+$ : 513.1302; found: 513.1306. ***anti*-(+)-2h.** Colorless oil;  $[\alpha]_{\text{D}} +31.3$  (c 3.1,  $\text{CHCl}_3$ );  $^1\text{H}$  NMR (300 MHz,  $\text{CDCl}_3$ ,  $25^\circ\text{C}$ )  $\delta$ : 7.73 (AA'BB', 2H), 7.39 (bs, 1H), 7.32 (AA'BB', 2H), 7.28 (AA'XX', 2H), 6.84 (AA'XX', 2H), 5.66 (d,  $J = 3.2$  Hz, 1H), 4.66 (d,  $J = 5.3$  Hz, 1H), 4.62-4.48 (m, 2H), 4.60 (dd,  $J = 5.3, 3.4$  Hz, 1H), 3.77 (s, 3H), 3.62 (s, 3H), 2.43 (s, 3H), 2.11 (s, 3H);  $^{13}\text{C}$  NMR (75 MHz,  $\text{CDCl}_3$ ,  $25^\circ\text{C}$ )  $\delta$ : 169.0, 166.9, 164.1, 156.8, 145.4, 133.8, 129.9, 129.7, 128.7, 118.7, 114.4, 82.8, 68.7, 60.1, 59.8, 57.9, 55.4, 21.7, 20.5; IR ( $\text{CHCl}_3$ ,  $\text{cm}^{-1}$ )  $\nu$  3331, 1753, 1700; HRMS (ESI) calcd for  $\text{C}_{23}\text{H}_{27}\text{N}_2\text{O}_8\text{S}^+$   $[M+H]^+$ : 419.1483; found: 491.1467.

## PREPARATION AND CHARACTERIZATION OF COMPOUNDS **3a-h** and **3j-m**

**Ugi adduct 3a. Method A.** From 100 mg (0.43 mmol) of aldehyde (+)-**1a**, compound **3a** was obtained as a mixture of isomers in a *syn/anti* ratio (65:35). After flash chromatography using *n*-hexane/ethyl acetate (2:1) as eluent, the less polar compound *syn*-(+)-**3a** (110 mg, 50%) and the more polar compound *anti*-(+)-**3a** (60 mg, 28%) were obtained.

Compounds **3a** and **3b** are a mixture of the corresponding rotamers, as shown in Scheme S1. Thus, the  $^1\text{H}$  and  $^{13}\text{C}$  NMR characterization has been achieved as is explained below.

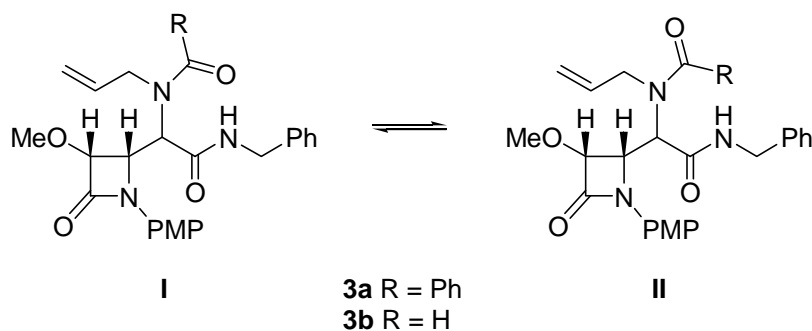

**Scheme S1.** Rotamers of compounds **3a** and **3b**

$^1\text{H}$  NMR spectra of both *syn*-(+)-**3a** and *anti*-(+)-**3a** at room temperature using  $\text{CDCl}_3$  showed a collection of broad signals. In addition, some signals of the  $^{13}\text{C}$  NMR spectra ( $\text{CDCl}_3$ ,  $25^\circ\text{C}$ ) for both isomers were missed. Then, the multiplicity of the corresponding signals of  $^1\text{H}$  NMR was achieved at  $100^\circ\text{C}$  using 1,1,2,2-tetrachloroethane as deuterated solvent. See:  $^1\text{H}$  NMR in  $(\text{CDCl}_2)_2$  of compound *syn*-(+)-**3a** at different temperatures in page 22.

***syn*-(+)-3a.** White solid; mp  $77\text{--}79^\circ\text{C}$  (*n*-hexane/ethyl acetate);  $[\alpha]_{\text{D}} +125.0$  (c 0.3,  $\text{CHCl}_3$ ).  $^1\text{H}$  NMR (300 MHz,  $\text{C}_2\text{D}_2\text{Cl}_4$ ,  $100^\circ\text{C}$ )  $\delta$  7.41-7.24 (m, 10H), 7.06-7.04 (m, 2H), 6.85-6.82 (m, 1H), 6.83 (AA'XX', 2H), 5.88-5.75 (m, 1H), 5.19 (dd,  $J = 9.1, 5.3$  Hz, 1H), 5.13-5.04 (m, 2H), 4.83 (d,  $J = 8.8$  Hz, 1H), 4.68 (d,  $J = 5.1$  Hz, 1H), 4.19 (dd,  $J =$



15.0, 5.7 Hz, 1H), 4.18-4.02 (m, 3H), 3.78 (s, 3H), 3.67 (s, 3H);  $^{13}\text{C}$  NMR (75 MHz,  $\text{C}_2\text{D}_2\text{Cl}_4$ ,  $100^\circ\text{C}$ )  $\delta$  174.6, 170.2, 166.5, 159.0, 139.2, 137.7, 135.7, 131.5, 131.1, 130.1, 129.9, 129.1, 129.0, 128.2, 123.0, 119.4, 116.0, 85.7, 62.6, 60.8, 58.1, 57.2, 45.2; IR (KBr,  $\text{cm}^{-1}$ )  $\nu$  3305, 1752, 1675, 1632; HRMS (ESI) calcd for  $\text{C}_{30}\text{H}_{32}\text{N}_3\text{O}_5^+$   $[M+H]^+$ : 514.2337; found: 514.2345. **anti-(+)-3a**. Colorless oil;  $[\alpha]_{\text{D}} +6.2$  (c 1.4,  $\text{CHCl}_3$ );  $^1\text{H}$  NMR (300 MHz,  $\text{C}_2\text{D}_2\text{Cl}_4$ ,  $100^\circ\text{C}$ )  $\delta$  7.35-7.18 (m, 10H), 6.89 (AA'XX', 2H), 6.75 (d,  $J = 7.1$  Hz, 2H), 6.44 (t,  $J = 5.5$  Hz, 1H), 5.58-5.45 (m, 1H), 5.26 (dd,  $J = 9.4, 5.2$  Hz, 1H), 4.89 (d,  $J = 9.3$  Hz, 1H), 5.02-4.87 (m, 2H), 4.72 (d,  $J = 5.1$  Hz, 1H), 4.47 (dd,  $J = 14.7, 5.5$  Hz, 1H), 4.40 (dd,  $J = 14.7, 5.6$  Hz, 1H), 3.85-3.66 (m, 2H), 3.79 (s, 3H), 3.54 (s, 3H);  $^{13}\text{C}$  NMR (75 MHz,  $\text{C}_2\text{D}_2\text{Cl}_4$ ,  $100^\circ\text{C}$ )  $\delta$ : 174.5, 169.6, 166.9, 159.4, 139.7, 137.0, 134.1, 131.5, 131.4, 130.2, 129.6, 129.2, 129.0, 128.2, 123.8, 120.8, 116.5, 85.8, 61.6, 61.0, 58.0, 57.3, 53.5, 45.1; IR ( $\text{CHCl}_3$ ,  $\text{cm}^{-1}$ )  $\nu$  3327, 1751, 1674, 1630; HRMS (ESI) calcd for  $\text{C}_{30}\text{H}_{32}\text{N}_3\text{O}_5^+$   $[M+H]^+$ : 514.2337; found: 514.2337.

**Ugi adduct 3b. Method A.** From 71 mg (0.30 mmol) of aldehyde (+)-**1a**, compound **3b** was obtained as a mixture of isomers in a *syn/anti* ratio (55:45). After flash chromatography using *n*-hexane/ethyl acetate (2:1) as eluent, the less polar compound *syn*-(+)-**3b** (50 mg, 38%) and the more polar compound *anti*-(+)-**3b** (41 mg, 31%) were obtained.<sup>1</sup> **syn-(+)-3b**. Colorless oil;  $[\alpha]_{\text{D}} +27.0$  (c 0.3,  $\text{CHCl}_3$ ).  $^1\text{H}$  NMR<sup>2</sup> (300 MHz,  $\text{C}_2\text{D}_2\text{Cl}_4$ ,  $25^\circ\text{C}$ )  $\delta$  7.97 (s, 0.3H), 7.65 (s, 0.7H), 7.31-7.09 (m, 7H), 6.81 (AA'XX', 2H), 6.22 (bs, 0.3H), 6.17 (t,  $J = 5.9$  Hz, 0.7H), 5.65-5.43 (m, 1H), 5.17-5.04 (m, 2H), 5.06 (dd,  $J = 9.7, 5.2$  Hz, 0.7H), 4.94 (dd,  $J = 8.6, 5.2$  Hz, 0.3H), 4.69-4.13 (m, 4H), 3.83-3.55 (m, 2H), 3.74 (s, 2.1H), 3.72 (s, 0.9H), 3.45 (s, 2.1H), 3.44 (s, 0.9H);  $^{13}\text{C}$  NMR (75

<sup>1</sup>  $^1\text{H}$  NMR spectra of both isomers of compound **3b** at room temperature in  $\text{CDCl}_3$  and  $(\text{CDCl}_2)_2$  showed two collections of well resolved signals of the corresponding rotamers **I** and **II**. However, it was not possible to achieve the coalescence temperature. Then, *syn*-(+)-**3b** and *anti*-(+)-**3b** are described as a mixture of rotamers at room temperature.

<sup>2</sup> Compound *syn*-(+)-**3b** is observed as a mixture of rotamers 37:63 in  $\text{CDCl}_3$  and 30:70 in  $\text{C}_2\text{D}_2\text{Cl}_4$  at  $25^\circ\text{C}$ .

MHz, CDCl<sub>3</sub>, 25°C) (m, rotamer)  $\delta$  167.33, 165.1, 162.8, 157.1, 137.4, 132.0, 129.3, 128.63, 127.8, 127.6, 120.3, 118.7, 114.5, 83.3, 60.9, 57.0, 56.1, 55.4, 45.7, 43.5; (M, rotamer)  $\delta$  167.27, 165.2, 163.7, 157.4, 137.7, 132.5, 128.8, 128.57, 127.7, 127.5, 122.0, 119.9, 114.1, 83.6, 60.1, 55.5, 55.3, 55.4, 49.6, 43.4; IR (KBr, cm<sup>-1</sup>)  $\nu$  3307, 1752, 1662; HRMS (ESI) calcd for C<sub>24</sub>H<sub>28</sub>N<sub>3</sub>O<sub>5</sub><sup>+</sup> [M+H]<sup>+</sup>: 438.2024; found: 438.2034. **anti-(+)-3b**. White solid; mp 130–132°C (*n*-hexane/ethyl acetate); [ $\alpha$ ]<sub>D</sub> +70.3 (c 0.5, CHCl<sub>3</sub>); <sup>1</sup>H NMR<sup>3</sup> (300 MHz, C<sub>2</sub>D<sub>2</sub>Cl<sub>4</sub>, 25°C)  $\delta$  8.30 (s, 0.5H), 8.00 (s, 0.5H), 7.27-7.14 (m, 5H), 6.86-6.76 (m, 4H), 6.76 (bs, 0.5H), 6.33 (bs, 0.5H), 5.84-5.64 (m, 1H), 5.28-5.08 (m, 2H), 5.07 (dd, *J* = 9.4, 5.1 Hz, 0.5H), 4.80 (dd, *J* = 9.2, 5.1 Hz, 0.5H), 4.74 (d, *J* = 9.5 Hz, 0.5H), 4.58 (d, *J* = 4.9 Hz, 0.5H), 4.56 (d, *J* = 4.9 Hz, 0.5H), 4.43 (dd, *J* = 15.8, 4.2 Hz, 0.5H), 4.16-3.98 (m, 2.5H), 3.83 (dd, *J* = 15.7, 7.8 Hz, 0.5H), 3.74 (s, 1.5H), 3.72 (s, 1.5H), 3.73-3.65 (m, 0.5H), 3.48-3.42 (m, 0.5H), 3.52 (s, 1.5H), 3.46 (s, 1.5H); <sup>13</sup>C NMR (75 MHz, CDCl<sub>3</sub>, 25°C): (m, rotamer)  $\delta$  168.11, 164.9, 163.8, 157.10, 137.0, 133.3, 129.0, 128.47, 127.6, 127.4, 120.9, 118.0, 114.1, 83.6, 60.3, 56.8, 55.6, 55.37, 46.1, 43.8; (M, rotamer)  $\delta$  168.09, 165.1, 163.5, 157.13, 136.7, 134.0, 129.1, 128.49, 127.8, 127.5, 120.2, 118.6, 114.2, 84.0, 60.0, 59.4, 57.0, 55.43, 49.8, 43.5; IR (CHCl<sub>3</sub>, cm<sup>-1</sup>)  $\nu$  3308, 1752, 1663; HRMS (ESI) calcd for C<sub>24</sub>H<sub>28</sub>N<sub>3</sub>O<sub>5</sub><sup>+</sup> [M+H]<sup>+</sup>: 438.2024; found: 438.2034.

**Ugi adduct 3c. Method A.** From 82 mg (0.35 mmol) of aldehyde (+)-**1a**, compound **3c** was obtained as a mixture of isomers in a *syn/anti* ratio (57:43). After flash chromatography using *n*-hexane/ethyl acetate (1:1) as eluent, an inseparable mixture of isomers (85 mg, 54%) was obtained as a colorless oil. **syn-3c** <sup>1</sup>H NMR (300 MHz, CDCl<sub>3</sub>, 25°C)  $\delta$  7.35-7.18 (m, 5H), 6.91-6.80 (m, 4H), 6.76 (t, *J* = 5.6 Hz, 1H), 5.91-5.78

<sup>3</sup> Compound *anti*-(+)-**3b** is observed as a mixture of rotamers 47:53 in CDCl<sub>3</sub> and 50:50 in C<sub>2</sub>D<sub>2</sub>Cl<sub>4</sub> at 25°C.

(m, 1H), 5.29-5.09 (m, 3H), 5.01-4.96 (m, 1H), 4.60 (d,  $J = 5.0$  Hz, 1H), 4.36-4.27 (m, 1H), 4.14 (dd,  $J = 14.6$  Hz, 6.3 Hz, 1H), 4.02 (dd,  $J = 14.8$ , 5.1 Hz, 1H), 3.78 (s, 3H), 3.60 (s, 3H), 3.56-3.48 (m, 1H), 2.10 (s, 3H);  $^{13}\text{C}$  NMR (75 MHz,  $\text{CDCl}_3$ ,  $25^\circ\text{C}$ )  $\delta$  172.1, 168.7, 165.1, 157.1, 137.2, 134.0, 128.9, 128.4, 127.6, 127.2, 121.3, 116.9, 114.0, 83.7, 59.2, 56.1, 55.43, 55.35, 49.5, 43.4, 21.7; HRMS (ESI) calcd for  $\text{C}_{25}\text{H}_{30}\text{N}_3\text{O}_5^+$  [ $M+H$ ] $^+$ : 452.2180; found: 452.2199. **anti-3c**  $^1\text{H}$  NMR (300 MHz,  $\text{CDCl}_3$ ,  $25^\circ\text{C}$ )  $\delta$  7.35-7.18 (m, 5H), 6.91-6.80 (m, 4H), 6.25 (t,  $J = 5.5$  Hz, 1H), 5.66-5.53 (1H, m), 5.29-5.09 (m, 3H), 5.01-4.96 (m, 1H), 4.73 (d,  $J = 5.0$  Hz, 1H), 4.50 (dd,  $J = 14.9$ , 6.2 Hz, 1H), 4.36-4.27 (m, 1H), 4.13-4.06 (m, 1H), 3.84-3.78 (m, 1H), 3.78 (s, 3H), 3.59 (s, 3H), 1.59 (s, 3H);  $^{13}\text{C}$  NMR (75 MHz,  $\text{CDCl}_3$ ,  $25^\circ\text{C}$ )  $\delta$  172.0, 168.0, 165.2, 157.1, 137.8, 132.5, 129.0, 128.5, 127.7, 127.4, 121.7, 118.2, 114.2, 83.6, 60.1, 57.3, 55.7, 55.4, 49.5, 43.3, 21.2.

**Ugi adduct 3d. Method A.** From 56 mg (0.24 mmol) of aldehyde (+)-**1a**, compound **3d** was obtained as a mixture of isomers in a *syn/anti* ratio (60:40). After flash chromatography using *n*-hexane/ethyl acetate (1:1) as eluent, the less polar compound *syn*-(+)-**3d** (56 mg, 44%) and the more polar compound *anti*-(+)-**3d** (37 mg, 30%) were obtained. **syn**-(+)-**3d**. Colorless oil;  $[\alpha]_{\text{D}} +85.3$  (c 1.0,  $\text{CHCl}_3$ );  $^1\text{H}$  NMR (300 MHz,  $\text{CDCl}_3$ ,  $25^\circ\text{C}$ )  $\delta$  7.31 (AA'XX', 2H), 7.22-7.19 (m, 3H), 6.92-6.88 (m, 2H), 6.84 (AA'XX', 2H), 6.64 (t,  $J = 5.4$  Hz, 1H), 5.96-5.81 (m, 1H), 5.31-5.21 (m, 2H), 5.16 (d,  $J = 9.2$  Hz, 1H), 4.98 (dd,  $J = 9.1$ , 5.1 Hz, 1H), 4.61 (d,  $J = 5.0$  Hz, 1H), 4.46-4.33 (m, 2H), 4.17 (dd,  $J = 14.8$ , 5.9 Hz, 1H), 4.06 (dd,  $J = 14.8$ , 5.4 Hz, 1H), 3.85 (s, 2H), 3.78 (s, 3H), 3.62 (s, 3H);  $^{13}\text{C}$  NMR (75 MHz,  $\text{CDCl}_3$ ,  $25^\circ\text{C}$ )  $\delta$  168.2, 167.9, 165.0, 157.2, 137.0, 133.8, 128.8, 128.4, 127.5, 127.3, 121.4, 117.3, 114.0, 83.6, 59.2, 57.9, 55.8, 55.4, 49.3, 43.4, 26.2; IR ( $\text{CHCl}_3$ ,  $\text{cm}^{-1}$ )  $\nu$  3313, 1752, 1659; HRMS (ESI) calcd for  $\text{C}_{25}\text{H}_{28}\text{BrN}_3\text{NaO}_5^+$  [ $M+Na$ ] $^+$ : 552.1105; found: 552.1127. **anti**-(+)-**3d**. Colorless oil;  $[\alpha]_{\text{D}} +16.1$  (c 1.3,  $\text{CHCl}_3$ );  $^1\text{H}$  NMR (300 MHz,  $\text{CDCl}_3$ ,  $25^\circ\text{C}$ )  $\delta$  7.36-7.26 (m, 5H), 7.19 (AA'XX', 2H), 6.85 (AA'XX',

2H), 6.17 (t,  $J = 5.0$  Hz, 1H), 5.73-5.60 (m, 1H), 5.27-5.17 (m, 3H), 4.80 (d,  $J = 9.2$  Hz, 1H), 4.75 (d,  $J = 5.1$  Hz, 1H), 4.42 (d,  $J = 5.7$  Hz, 2H), 3.91 (dd,  $J = 16.3, 4.9$  Hz, 1H), 3.78 (s, 3H), 3.62-3.54 (m, 1H), 3.56 (s, 3H), 3.50 (d,  $J = 11.7$  Hz, 1H), 3.32 (d,  $J = 11.7$  Hz, 1H);  $^{13}\text{C}$  NMR (75 MHz,  $\text{CDCl}_3$ , 25°C)  $\delta$  167.7, 167.5, 165.3, 157.4, 137.6, 131.7, 129.0, 128.6, 127.7, 127.5, 121.8, 120.0, 114.4, 83.8, 60.2, 58.5, 55.8, 55.5, 51.3, 43.5, 26.5; IR ( $\text{CHCl}_3$ ,  $\text{cm}^{-1}$ )  $\nu$  3307, 1751, 1654; HRMS (ESI) calcd for  $\text{C}_{25}\text{H}_{29}\text{BrN}_3\text{O}_5^+$   $[M+H]^+$ : 530.1285; found: 530.1271.

**Ugi adduct 3e. Method A.** From 66 mg (0.28 mmol) of aldehyde (+)-**1a**, compound **3e** was obtained as a mixture of isomers in a *syn/anti* ratio (57:43). After flash chromatography using *n*-hexane/ethyl acetate (1:1) as eluent, the less polar compound *syn*-(+)-**3e** (88 mg, 52%) and the more polar compound *anti*-(-)-**3e** (66 mg, 39%) were obtained. **syn**-(+)-**3e**. Colorless oil;  $[\alpha]_{\text{D}} +89.9$  (c 1.6,  $\text{CHCl}_3$ );  $^1\text{H}$  NMR (300 MHz,  $\text{CDCl}_3$ , 25°C)  $\delta$  7.88 (AA'BB', 2H), 7.74 (AA'BB', 2H), 7.29 (AA'XX', 2H), 7.21-7.19 (m, 3H), 6.89-6.86 (m, 2H), 6.81 (AA'XX', 2H), 6.62 (t,  $J = 5.7$  Hz, 1H), 6.00-5.87 (m, 1H), 5.46-5.36 (m, 2H), 5.12 (d,  $J = 9.1$  Hz, 1H), 5.01 (dd,  $J = 9.1, 5.0$  Hz, 1H), 4.64 (d,  $J = 5.0$  Hz, 1H), 4.60-4.42 (m, 1H), 4.57 (d,  $J = 16.5$  Hz, 1H), 4.45 (d,  $J = 16.5$  Hz, 1H), 4.23-4.16 (m, 1H), 4.20 (dd,  $J = 14.9, 6.3$  Hz, 1H), 4.02 (dd,  $J = 14.8, 4.8$  Hz, 1H), 3.77 (s, 3H), 3.67 (s, 3H);  $^{13}\text{C}$  NMR (75 MHz,  $\text{CDCl}_3$ , 25°C)  $\delta$  168.1, 167.8, 167.6, 165.0, 157.1, 137.0, 134.1, 133.1, 132.1, 128.9, 128.5, 127.6, 127.3, 123.5, 121.2, 118.0, 114.0, 83.8, 59.5, 58.3, 55.7, 55.4, 48.5, 43.5, 39.5; IR ( $\text{CHCl}_3$ ,  $\text{cm}^{-1}$ )  $\nu$  3336, 1752, 1718, 1667; HRMS (ESI) calcd for  $\text{C}_{33}\text{H}_{33}\text{N}_4\text{O}_7^+$   $[M+H]^+$ : 597.2344; found: 597.2339. **anti**-(-)-**3e**. White solid; mp 157–158°C (*n*-hexane/ethyl acetate);  $[\alpha]_{\text{D}} -15.2$  (c 1.6,  $\text{CHCl}_3$ );  $^1\text{H}$  NMR (300 MHz,  $\text{CDCl}_3$ , 25°C)  $\delta$  7.84 (AA'BB', 2H), 7.75 (AA'BB', 2H), 7.33-7.22 (m, 7H), 7.06 (AA'XX', 2H), 6.24 (t,  $J = 5.3$  Hz, 1H), 5.84-5.71 (m, 1H), 5.38-5.28 (m, 2H), 5.21 (dd,  $J = 9.5, 5.0$  Hz, 1H), 4.74 (d,  $J = 5.0$  Hz, 1H), 4.66-4.52 (m, 1H), 4.46

(dd,  $J = 15.0, 6.1$  Hz, 1H), 4.34 (dd,  $J = 14.9, 5.6$  Hz, 1H), 4.00 (AB,  $J = 16.3$  Hz, 2H), 3.88 (s, 3H), 3.83-3.74 (m, 1H), 3.54 (s, 3H), 3.50 (dd,  $J = 11.8, 6.9$  Hz, 1H);  $^{13}\text{C}$  NMR (75 MHz,  $\text{CDCl}_3$ ,  $25^\circ\text{C}$ )  $\delta$  167.6, 167.5, 167.4, 165.3, 157.3, 137.8, 134.1, 132.1, 131.3, 129.0, 128.5, 127.6, 127.2, 123.4, 121.4, 120.1, 114.8, 83.9, 60.3, 59.8, 55.6, 55.5, 50.7, 43.4, 39.3; IR (KBr,  $\text{cm}^{-1}$ )  $\nu$  3329, 1751, 1719, 1664; HRMS (ESI) calcd for  $\text{C}_{33}\text{H}_{33}\text{N}_4\text{O}_7^+$  [ $M+H$ ] $^+$ : 597.2344; found: 597.2362.

**Ugi adduct 3f. Method A.** From 53 mg (0.23 mmol) of aldehyde (+)-**1a**, compound **3f** was obtained as a mixture of isomers in a *syn/anti* ratio (60:40). After flash chromatography using *n*-hexane/ethyl acetate (1:1) as eluent, the less polar compound *anti*-(+)-**3f** (31 mg, 36%) and the more polar compound *syn*-(+)-**3f** (46 mg, 54%) were obtained. ***syn*-(+)-3f.** White solid; mp  $176\text{--}178^\circ\text{C}$  (*n*-hexane/ethyl acetate);  $[\alpha]_{\text{D}} +79.6$  (c 1.5,  $\text{CHCl}_3$ );  $^1\text{H}$  NMR (300 MHz,  $\text{CDCl}_3$ ,  $25^\circ\text{C}$ )  $\delta$  7.30 (AA'XX', 2H), 6.82 (AA'XX', 2H), 6.22 (bs, 1H), 5.90-5.78 (m, 1H), 5.27-5.21 (m, 2H), 5.11 (d,  $J = 8.6$  Hz, 1H), 4.89 (dd,  $J = 8.6, 5.1$  Hz, 1H), 4.60 (d,  $J = 5.0$  Hz, 1H), 4.24 (dd,  $J = 18.2, 5.6$  Hz, 1H), 4.13-4.04 (m, 1H), 3.76 (s, 3H), 3.62 (s, 3H), 2.10 (s, 3H), 1.07 (s, 9H);  $^{13}\text{C}$  NMR (75 MHz,  $\text{CDCl}_3$ ,  $25^\circ\text{C}$ )  $\delta$  172.1, 167.6, 165.3, 157.4, 134.2, 128.9, 122.2, 116.7, 114.0, 83.6, 59.3, 57.9, 56.5, 55.5, 51.3, 49.3, 28.2, 21.8; IR (KBr,  $\text{cm}^{-1}$ )  $\nu$  3310, 1753, 1675, 1634; HRMS (ESI) calcd for  $\text{C}_{22}\text{H}_{32}\text{N}_3\text{O}_5^+$  [ $M+H$ ] $^+$ : 418.2337; found: 418.2358; ***anti*-(+)-3f.** White solid; mp  $134\text{--}135^\circ\text{C}$  (*n*-hexane/ethyl acetate);  $[\alpha]_{\text{D}} +10.8$  (c 0.3,  $\text{CHCl}_3$ );  $^1\text{H}$  NMR (300 MHz,  $\text{CDCl}_3$ ,  $25^\circ\text{C}$ )  $\delta$  7.19 (AA'XX', 2H), 6.87 (AA'XX', 2H), 5.77-5.63 (m, 1H), 5.63 (bs, 1H), 5.22-5.15 (m, 2H), 5.00 (dd,  $J = 9.5, 4.8$  Hz, 1H), 4.93 (d,  $J = 8.8$  Hz, 1H), 4.71 (d,  $J = 4.7$  Hz, 1H), 3.91 (dd,  $J = 16.7, 4.7$  Hz, 1H), 3.79 (s, 3H), 3.58 (s, 3H), 3.52 (dd,  $J = 17.0, 6.9$  Hz, 1H), 1.60 (s, 3H), 1.32 (s, 9H);  $^{13}\text{C}$  NMR (75 MHz,  $\text{CDCl}_3$ ,  $25^\circ\text{C}$ )  $\delta$  171.9, 167.5, 165.3, 157.3, 132.9, 129.4, 122.0, 118.3, 114.3, 83.8, 60.3, 58.0,

56.1, 55.5, 51.4, 50.0, 28.6, 21.4; IR (KBr,  $\text{cm}^{-1}$ )  $\nu$  3312, 1753, 1642; HRMS (ESI) calcd for  $\text{C}_{22}\text{H}_{32}\text{N}_3\text{O}_5^+$   $[M+H]^+$ : 418.2337; found: 418.2334.

**Ugi adduct 3g. Method A.** From 66 mg (0.23 mmol) of aldehyde (+)-**1b**, compound **3g** was obtained as a mixture of isomers in a *syn/anti* ratio (65:35). After flash chromatography using *n*-hexane/ethyl acetate (1:1) as eluent, the less polar compound *anti*-(+)-**3g** (22 mg, 20%) and the more polar compound *syn*-(+)-**3g** (42 mg, 37%) were obtained. *syn*-(+)-**3g**. White solid; mp 137–138°C (*n*-hexane/ethyl acetate);  $[\alpha]_{\text{D}} +28.5$  (c 0.4,  $\text{CHCl}_3$ );  $^1\text{H}$  NMR (300 MHz,  $\text{CDCl}_3$ , 25°C)  $\delta$  7.31-7.25 (m, 5H), 7.24 (AA'XX', 2H), 7.17-7.14 (m, 2H), 7.05-7.01 (m, 3H), 6.90 (AA'XX', 2H), 6.26 (t,  $J = 5.5$  Hz, 1H), 5.65-5.52 (m, 1H), 5.49 (d,  $J = 4.8$  Hz, 1H), 5.34 (d,  $J = 9.9$  Hz, 1H), 5.27 (dd,  $J = 9.4$ , 5.1 Hz, 1H), 5.18-5.09 (m, 2H), 4.30 (dd,  $J = 14.6$ , 6.0 Hz, 1H), 4.20 (dd,  $J = 14.6$ , 5.3 Hz, 1H), 4.02-3.94 (m, 1H), 3.80 (s, 3H), 3.56 (dd,  $J = 17.0$ , 6.3 Hz, 1H), 1.60 (s, 3H);  $^{13}\text{C}$  NMR (75 MHz,  $\text{CDCl}_3$ , 25°C)  $\delta$  172.2, 167.6, 163.8, 157.7, 157.5, 137.4, 132.6, 129.5, 128.9, 128.6, 128.0, 127.5, 122.6, 122.1, 118.0, 116.4, 114.3, 80.8, 57.1, 55.7, 55.5, 49.8, 43.5, 21.4; IR (KBr,  $\text{cm}^{-1}$ )  $\nu$  3324, 1756, 1641; HRMS (ESI) calcd for  $\text{C}_{30}\text{H}_{32}\text{N}_3\text{O}_5^+$   $[M+H]^+$ : 514.2336; found: 514.2317. *anti*-(+)-**3g**. White solid; mp 158–159°C (*n*-hexane/ethyl acetate);  $[\alpha]_{\text{D}} +95.5$  (c 0.8,  $\text{CHCl}_3$ );  $^1\text{H}$  NMR (300 MHz,  $\text{CDCl}_3$ , 25°C)  $\delta$  7.39 (AA'XX', 2H), 7.30 (t,  $J = 8.0$  Hz, 1H), 7.22-7.19 (m, 3H), 7.06-7.02 (m, 3H), 6.89-6.84 (m, 3H), 6.85 (AA'XX', 2H), 5.77-5.64 (m, 1H), 5.44 (d,  $J = 4.5$  Hz, 1H), 5.30 (dd,  $J = 9.9$ , 4.4 Hz, 1H), 5.23 (d,  $J = 9.8$  Hz, 1H), 5.18-5.10 (m, 2H), 4.22-4.10 (m, 1H), 4.19 (dd,  $J = 15.0$ , 6.6 Hz, 1H), 4.01-3.95 (m, 1H), 4.00 (dd,  $J = 14.7$ , 4.9 Hz, 1H), 3.79 (s, 3H), 1.94 (s, 3H);  $^{13}\text{C}$  NMR (75 MHz,  $\text{CDCl}_3$ , 25°C)  $\delta$  172.2, 168.6, 164.4, 157.3, 157.2, 137.1, 133.6, 129.6, 128.8, 128.5, 127.6, 127.3, 122.3, 121.5, 117.3, 115.3, 114.0, 80.1, 58.5, 56.1, 55.4, 50.0, 43.4, 21.8; IR (KBr,  $\text{cm}^{-1}$ )  $\nu$  3286, 1757, 1642; HRMS (ESI) calcd for  $\text{C}_{30}\text{H}_{32}\text{N}_3\text{O}_5^+$   $[M+H]^+$ : 514.2336; found: 514.2355.

**Ugi adduct 3h. Method A.** From 77 mg (0.35 mmol) of aldehyde (+)-**1e**, compound **3h** was obtained as a mixture of isomers in a *syn/anti* ratio (76:24). After flash chromatography using *n*-hexane/ethyl acetate (1:1) as an eluent, the less polar compound *syn*-(-)-**3h** (20 mg) and an inseparable mixture of isomers (68 mg) in a *syn/anti* ratio (69:31), (62% yield considering both fractions). *syn*-(-)-**3h**. Colorless oil;  $[\alpha]_D -29.0$  (c 1.4, CHCl<sub>3</sub>); <sup>1</sup>H NMR (300 MHz, CDCl<sub>3</sub>, 25°C)  $\delta$  7.38-7.13 (m, 10H), 6.45 (t, *J* = 5.6 Hz, 1H), 5.50-5.38 (m, 1H), 5.25 (d, *J* = 10.0 Hz, 1H), 4.98-5.04 (m, 2H), 4.66 (d, *J* = 5.0 Hz, 1H), 4.60 (d, *J* = 15.9 Hz, 1H), 4.47 (dd, *J* = 10.0, 4.9 Hz, 1H), 4.46 (dd, *J* = 14.9, 5.1 Hz, 1H), 4.18 (dd, *J* = 14.9, 5.3 Hz, 1H), 4.16 (d, *J* = 16.2 Hz, 1H), 3.71 (dd, *J* = 17.1, 4.8 Hz, 1H), 3.48 (s, 3H), 3.47 (dd, *J* = 16.9, 6.9 Hz, 1H), 1.87 (s, 3H); <sup>13</sup>C NMR (75 MHz, CDCl<sub>3</sub>, 25°C)  $\delta$  172.6, 168.6, 168.3, 137.8, 135.7, 132.7, 128.8, 128.5, 127.8, 127.7, 127.4, 127.1, 117.8, 84.4, 59.8, 56.5, 55.4, 48.3, 44.8, 43.1, 21.9; IR (CHCl<sub>3</sub>, cm<sup>-1</sup>)  $\nu$  3318, 1755, 1645; HRMS (ESI) calcd for C<sub>25</sub>H<sub>30</sub>N<sub>3</sub>O<sub>4</sub><sup>+</sup> [*M+H*]<sup>+</sup>: 436.2231; found: 436.2229.

**Ugi adduct 3j. Method A.** From 78 mg (0.34 mmol) of aldehyde (-)-**1d**, compound **3j** was obtained as a mixture of isomers in a *syn/anti* ratio (68:32). After flash chromatography using *n*-hexane/ethyl acetate (2:1) as eluent, the less polar compound *anti*-(+)-**3j** (49 mg, 28%) and the more polar compound *syn*-(-)-**3j** (103 mg, 58%) were obtained. *syn*-(-)-**3j**. Colorless oil;  $[\alpha]_D -39.0$  (c 1.2, CHCl<sub>3</sub>); <sup>1</sup>H NMR (300 MHz, CDCl<sub>3</sub>, 25°C)  $\delta$  7.28-7.23 (m, 5H), 7.18-7.15 (m, 2H), 7.07-6.92 (m, 3H), 6.37 (t, *J* = 5.6 Hz, 1H), 5.85-5.62 (m, 2H), 5.42 (d, *J* = 10.2 Hz, 1H), 5.40 (d, *J* = 5.0 Hz, 1H), 5.31-5.11 (m, 4H), 4.73 (dd, *J* = 9.9, 4.9 Hz, 1H), 4.26-4.04 (m, 5H), 3.99 (d, *J* = 10.8 Hz, 1H), 3.85 (d, *J* = 11.0 Hz, 1H), 3.64 (dd, *J* = 16.2, 6.7 Hz, 1H); <sup>13</sup>C NMR (75 MHz, CDCl<sub>3</sub>, 25°C)  $\delta$  168.7, 167.4, 166.1, 157.4, 137.2, 132.8, 131.8, 129.4, 128.7, 128.1, 127.6, 122.6, 118.35, 118.27, 116.2, 81.4, 57.5, 54.6, 48.3, 43.6, 43.5, 26.2; IR (CHCl<sub>3</sub>,

cm<sup>-1</sup>)  $\nu$  3323, 1760, 1660; HRMS (ESI) calcd for C<sub>26</sub>H<sub>29</sub>BrN<sub>3</sub>O<sub>4</sub><sup>+</sup> [M+H]<sup>+</sup>: 526.1336; found: 526.1357. **anti-(+)-3j**. Colorless oil; [ $\alpha$ ]<sub>D</sub> +105.3 (c 0.4, CHCl<sub>3</sub>); <sup>1</sup>H NMR (300 MHz, CDCl<sub>3</sub>, 25°C)  $\delta$  7.35-7.24 (m, 7H), 7.12-6.95 (m, 3H), 5.91-5.62 (m, 2H), 5.29 (d,  $J$  = 10.4 Hz, 1H), 5.26 (d,  $J$  = 5.0 Hz, 1H), 5.32-5.12 (m, 4H), 4.61 (dd,  $J$  = 9.9, 4.8 Hz, 1H), 4.44 (dd,  $J$  = 14.7, 6.1 Hz, 1H), 4.36 (dd,  $J$  = 14.9, 6.0 Hz, 1H), 4.16-3.87 (m, 3H), 3.71 (d,  $J$  = 11.1 Hz, 1H), 3.64 (d,  $J$  = 11.0 Hz, 1H), 3.65-3.58 (m, 1H); <sup>13</sup>C NMR (75 MHz, CDCl<sub>3</sub>, 25°C)  $\delta$  168.3, 168.2, 166.0, 157.0, 137.4, 132.9, 131.6, 129.6, 128.6, 127.7, 127.6, 122.3, 118.4, 117.9, 115.4, 80.6, 58.0, 55.4, 48.8, 43.8, 43.6, 26.1; IR (CHCl<sub>3</sub>, cm<sup>-1</sup>)  $\nu$  3321, 1759, 1652; HRMS (ESI) calcd for C<sub>26</sub>H<sub>29</sub>BrN<sub>3</sub>O<sub>4</sub><sup>+</sup> [M+H]<sup>+</sup>: 526.1336; found: 526.1356.

**Ugi adduct 3k. Method B.** From 76 mg (0.32 mmol) of aldehyde (+)-**1a**, compound **3k** was obtained as a mixture of isomers in a *syn/anti* ratio (60:40). After flash chromatography using *n*-hexane/ethyl acetate (2:1) as eluent, the less polar compound *syn*-(+)-**3k** (58 mg, 34%), and the more polar compound *anti*-(+)-**3k** (38 mg, 23%) were obtained. **syn-(+)-3k**. Colorless oil; [ $\alpha$ ]<sub>D</sub> +35.4 (c 0.8, CHCl<sub>3</sub>); <sup>1</sup>H NMR (300 MHz, CDCl<sub>3</sub>, 25°C)  $\delta$  7.23-7.19 (m, 5H), 7.22 (AA'XX', 2H), 6.94 (AA'XX', 2H), 6.86-6.83 (m, 2H), 6.82 (AA'XX', 2H), 6.50 (t,  $J$  = 5.5 Hz, 1H), 5.21 (d,  $J$  = 9.8 Hz, 1H), 4.39 (dd,  $J$  = 9.8, 5.1 Hz, 1H), 4.34 (d,  $J$  = 5.0 Hz, 1H), 4.13 (dd,  $J$  = 14.6, 5.1 Hz, 1H), 3.98 (dd,  $J$  = 14.6, 6.1 Hz, 1H), 3.87 (s, 3H), 3.76 (s, 3H), 3.71 (s, 3H), 1.81 (s, 3H); <sup>13</sup>C NMR (75 MHz, CDCl<sub>3</sub>, 25°C)  $\delta$  171.5, 169.2, 165.0, 159.6, 157.0, 137.1, 132.1, 128.9, 128.4, 127.6, 127.2, 121.2, 114.5, 113.8, 82.6, 58.8, 58.1, 56.1, 55.4, 55.3, 43.6, 22.7; IR (CHCl<sub>3</sub>, cm<sup>-1</sup>)  $\nu$  3301, 1751, 1654; HRMS (ESI) calcd for C<sub>29</sub>H<sub>32</sub>N<sub>3</sub>O<sub>6</sub><sup>+</sup> [M+H]<sup>+</sup>: 518.2286; found: 518.2293. **anti-(+)-3j**. Colorless oil; [ $\alpha$ ]<sub>D</sub> +29.1 (c 0.5, CHCl<sub>3</sub>); <sup>1</sup>H NMR (300 MHz, CDCl<sub>3</sub>, 25°C)  $\delta$  7.38-7.19 (m, 7H), 6.91 (AA'XX', 2H), 6.71-6.67 (m, 1H), 6.69 (AA'XX', 2H), 6.51 (AA'XX', 2H), 5.12 (dd,  $J$  = 9.3, 5.2 Hz, 1H), 4.95 (d,  $J$  =



9.2 Hz, 1H), 4.68 (d,  $J = 5.0$  Hz, 1H), 4.51 (d,  $J = 5.7$  Hz, 2H), 3.82 (s, 3H), 3.76 (s, 3H), 3.50 (s, 3H), 1.61 (s, 3H);  $^{13}\text{C}$  NMR (75 MHz,  $\text{CDCl}_3$ ,  $25^\circ\text{C}$ )  $\delta$  173.0, 168.2, 166.0, 159.0, 158.0, 138.1, 129.1, 128.7, 128.6, 127.7, 127.5, 123.7, 114.6, 114.2, 83.6, 60.0, 56.8, 55.5, 55.4, 43.5, 23.1; IR ( $\text{CHCl}_3$ ,  $\text{cm}^{-1}$ )  $\nu$  3366, 1751, 1660; HRMS (ESI) calcd for  $\text{C}_{29}\text{H}_{32}\text{N}_3\text{O}_6^+$   $[M+H]^+$ : 518.2286; found: 518.2295.

**Ugi adduct 3I. Method B.** From 112 mg (0.48 mmol) of aldehyde (–)-**1d**, compound **3I** was obtained as a mixture of isomers in a *syn/anti* ratio (70:30). After flash chromatography using *n*-hexane/ethyl acetate (1:1), the less polar compound *anti*-(+)-**3I** (34 mg, 19%) and the more polar compound *syn*-(+)-**3I** (80 mg, 46%) were obtained.

***syn*-(+)-3I.** Colorless oil;  $[\alpha]_{\text{D}} +36.7$  (c 1.7,  $\text{CHCl}_3$ );  $^1\text{H}$  NMR (300 MHz,  $\text{CDCl}_3$ ,  $25^\circ\text{C}$ )  $\delta$  7.33-7.21 (m, 7H), 7.02-6.97 (m, 5H), 6.84 (AA'BB', 2H), 6.74 (t,  $J = 5.9$  Hz, 1H), 5.89-5.76 (m, 1H), 5.71 (d,  $J = 8.9$  Hz, 1H), 5.31 (d,  $J = 4.4$  Hz, 1H), 5.26-5.19 (m, 2H), 4.46 (dd,  $J = 8.9, 5.0$  Hz, 1H), 4.41 (dd,  $J = 14.5, 5.8$  Hz, 1H), 4.32 (dd,  $J = 14.7, 5.9$  Hz, 1H), 3.96 (ddt,  $J = 16.7, 5.3, 1.5$  Hz, 1H), 3.82 (s, 3H), 3.81 (ddt,  $J = 16.5, 5.4, 1.5$  Hz, 1H), 1.86 (s, 3H);  $^{13}\text{C}$  NMR (75 MHz,  $\text{CDCl}_3$ ,  $25^\circ\text{C}$ )  $\delta$  172.7, 168.2, 166.5, 159.5, 157.6, 137.8, 132.2, 131.7, 130.0, 129.3, 128.6, 128.1, 127.4, 122.3, 117.5, 116.2, 114.7, 81.9, 58.9, 56.4, 55.4, 43.5, 43.3, 23.1; IR ( $\text{CHCl}_3$ ,  $\text{cm}^{-1}$ )  $\nu$  3336, 1758, 1653; HRMS (ESI) calcd for  $\text{C}_{30}\text{H}_{32}\text{N}_3\text{O}_5^+$   $[M+H]^+$ : 514.2336; found: 514.2339.

***anti*-(+)-3I.** Colorless oil;  $[\alpha]_{\text{D}} +50.7$  (c 0.4,  $\text{CHCl}_3$ );  $^1\text{H}$  NMR (300 MHz,  $\text{CDCl}_3$ ,  $25^\circ\text{C}$ )  $\delta$  7.40-7.29 (m, 7H), 7.15-7.12 (m, 2H), 7.05 (t,  $J = 7.3$  Hz, 1H), 6.83 (AA'BB', 2H), 6.79 (AA'BB', 2H), 5.76-5.63 (m, 1H), 5.62 (d,  $J = 10.8$  Hz, 1H), 5.17-5.05 (m, 2H), 5.11 (d,  $J = 4.8$  Hz, 1H), 4.51 (dd,  $J = 14.6, 6.0$  Hz, 1H), 4.44 (dd,  $J = 14.4, 5.6$  Hz, 1H), 4.00 (dd,  $J = 10.4, 4.8$  Hz, 1H), 3.84 (ddt,  $J = 15.6, 6.2, 1.2$  Hz, 1H), 3.78 (s, 3H), 3.63 (ddt,  $J = 15.6, 5.6, 1.4$  Hz, 1H), 1.84 (s, 3H);  $^{13}\text{C}$  NMR (75 MHz,  $\text{CDCl}_3$ ,  $25^\circ\text{C}$ )  $\delta$  171.9, 169.4, 165.9, 159.7, 157.3, 137.9, 131.9, 131.3, 129.9, 129.7, 128.6, 127.8, 127.5, 122.3, 117.8, 115.7, 114.9, 80.5,

57.1, 55.6, 55.4, 43.9, 43.6, 22.5; IR (CHCl<sub>3</sub>, cm<sup>-1</sup>)  $\nu$  3345, 1760, 1676, 1651; HRMS (ESI) calcd for C<sub>30</sub>H<sub>32</sub>N<sub>3</sub>O<sub>5</sub><sup>+</sup> [M]<sup>+</sup>: 514.2336; found: 514.2358.

**Ugi adduct 3m. Method B.** From 76 mg (0.33 mmol) of aldehyde (-)-**1d**, compound **3m** was obtained as a mixture of isomers in a *syn/anti* ratio (70:30). After flash chromatography using *n*-hexane/ethyl acetate (1:1) as eluent, the less polar compound *anti*-(+)-**3m** (44 mg, 20%) and the more polar compound *syn*-(+)-**3m** (103 mg, 48%) were obtained. ***syn*-(+)-3m.** Colorless oil; [ $\alpha$ ]<sub>D</sub> +26.4 (c 0.7, CHCl<sub>3</sub>); <sup>1</sup>H NMR (300 MHz, CDCl<sub>3</sub>, 25°C)  $\delta$  7.87 (AA'BB', 2H), 7.74 (AA'BB', 2H), 7.44 (AA'XX', 2H), 7.24-7.21 (m, 2H), 7.02-6.96 (m, 5H), 6.76 (t, *J* = 5.6 Hz, 1H), 5.97-5.84 (m, 1H), 5.64 (d, *J* = 8.6 Hz, 1H), 5.37-5.31 (m, 2H), 5.32 (d, *J* = 5.1 Hz, 1H), 4.59 (dd, *J* = 8.6, 5.0 Hz, 1H), 4.24 (q, *J* = 7.2 Hz, 2H), 4.22 (d, *J* = 17.2 Hz, 1H), 4.14-4.03 (m, 2H), 4.13 (d, *J* = 17.1 Hz, 1H), 3.84 (s, 3H), 3.82-3.75 (m, 2H), 1.30 (t, *J* = 7.2 Hz, 3H); <sup>13</sup>C NMR (75 MHz, CDCl<sub>3</sub>, 25°C)  $\delta$  169.3, 168.3, 167.8, 167.7, 166.4, 160.1, 157.3, 134.1, 132.1, 132.0, 130.4, 129.8, 129.3, 123.5, 122.3, 118.0, 115.9, 115.2, 81.4, 61.4, 59.8, 56.0, 55.5, 43.4, 40.9, 40.3, 14.1; IR (CHCl<sub>3</sub>, cm<sup>-1</sup>)  $\nu$  3340, 1759, 1718, 1669; HRMS (ESI) calcd for C<sub>35</sub>H<sub>34</sub>N<sub>4</sub>NaO<sub>9</sub><sup>+</sup> [M+Na]<sup>+</sup>: 677.2218; found: 677.2237. ***anti*-(+)-3m.** Colorless oil; [ $\alpha$ ]<sub>D</sub> +134.7 (c 0.3, CHCl<sub>3</sub>); <sup>1</sup>H NMR (300 MHz, CDCl<sub>3</sub>, 25°C)  $\delta$  7.93 (AA'BB', 2H), 7.75 (AA'BB', 2H), 7.47-7.41 (m, 2H), 7.38-7.35 (m, 2H), 7.20 (t, *J* = 6.1 Hz, 1H), 7.11 (tt, *J* = 7.1, 1.2 Hz, 1H), 7.04-6.82 (m, 4H), 5.78-5.65 (m, 1H), 5.59 (d, *J* = 10.2 Hz, 1H), 5.18-5.07 (m, 2H), 5.15 (d, *J* = 5.0 Hz, 1H), 4.31 (d, *J* = 16.8 Hz, 1H), 4.27 (q, *J* = 7.2 Hz, 2H), 4.16 (dd, *J* = 17.8, 6.6 Hz, 1H), 4.06 (d, *J* = 16.8 Hz, 1H), 4.04 (dd, *J* = 10.4, 4.8 Hz, 1H), 3.93-3.86 (m, 1H), 3.91 (dd, *J* = 17.8, 5.5 Hz, 1H), 3.82 (s, 3H), 3.68 (ddt, *J* = 15.6, 5.7, 1.3 Hz, 1H), 1.32 (t, *J* = 7.1 Hz, 3H); <sup>13</sup>C NMR (75 MHz, CDCl<sub>3</sub>, 25°C)  $\delta$  169.6, 169.0, 167.7, 167.6, 166.0, 160.2, 157.3, 134.0, 132.1, 131.8, 130.8, 129.8, 129.0, 123.5, 122.4, 117.9, 116.1, 115.3, 80.6, 61.5, 57.5, 55.5, 54.9, 43.8, 41.3, 40.0, 14.2; IR

(CHCl<sub>3</sub>, cm<sup>-1</sup>):  $\nu$  3364, 1760, 1721, 1682; HRMS (ES): calcd for C<sub>35</sub>H<sub>34</sub>N<sub>4</sub>O<sub>9</sub><sup>+</sup> [M+H]<sup>+</sup>:  
655.2399; found: 655.2410.

**Figure S1.** Observed NOE for compounds **5**

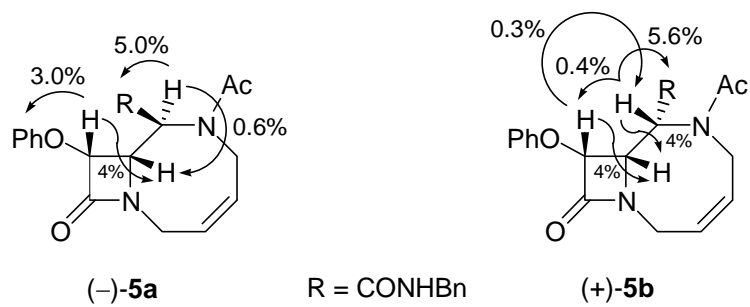

**Table S1.** Representative chemical shifts ( $\delta$ , ppm) and vicinal coupling constants ( $^3J$ , Hz) of  $^1\text{H}$  and  $^{13}\text{C}$  NMR of compounds **2**<sup>a</sup>

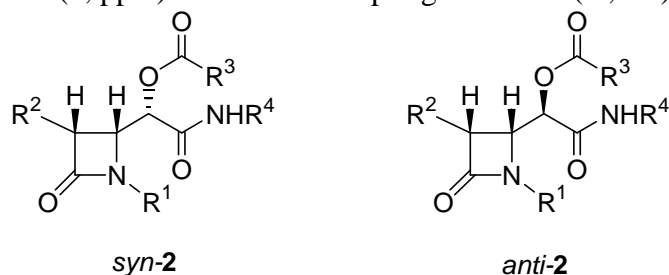

| Comp.     | R <sup>1</sup>   | R <sup>2</sup> | R <sup>3</sup>                   | R <sup>4</sup>                     | <i>syn</i> |      |       |        | <i>anti</i> |      |       |        |
|-----------|------------------|----------------|----------------------------------|------------------------------------|------------|------|-------|--------|-------------|------|-------|--------|
|           |                  |                |                                  |                                    | $\delta$   |      | $^3J$ |        | $\delta$    |      | $^3J$ |        |
|           |                  |                |                                  |                                    | H4'        | C4'  | H3-H4 | H4-H4' | H4'         | C4'  | H3-H4 | H4-H4' |
| <b>2a</b> | PMP <sup>b</sup> | MeO            | Ph                               | Bn                                 | 5.80       | 70.4 | 5.3   | 3.2    | 6.10        | 69.1 | 5.3   | 3.4    |
| <b>2b</b> | PMP <sup>b</sup> | PhO            | Ph                               | Bn                                 | 5.95       | 69.8 | 5.3   | 2.1    | 6.29        | 68.7 | 5.1   | 3.2    |
| <b>2c</b> | 2-propynyl       | PhO            | Ph                               | Bn                                 | 5.81       | 71.6 | 5.1   | 5.1    | 6.09        | 69.7 | 5.0   | 4.0    |
| <b>2d</b> | PMP <sup>b</sup> | MeO            | Me                               | Bn                                 | 5.56       | 70.5 | 5.3   | 4.6    | 5.78        | 69.0 | 5.1   | 3.8    |
| <b>2e</b> | PMP <sup>b</sup> | MeO            | Me                               | <i>t</i> -Bu                       | 5.39       | 71.3 | 5.1   | 5.1    | 5.55        | 69.8 | 5.4   | 2.3    |
| <b>2f</b> | 2-propenyl       | PhO            | 2-IC <sub>6</sub> H <sub>4</sub> | <i>t</i> -Bu                       | 5.70       | 71.5 | 5.1   | 3.2    | 5.73        | 71.3 | 5.0   | 4.0    |
| <b>2g</b> | 2-propenyl       | PhO            | CH <sub>2</sub> Phth             | CH <sub>2</sub> CO <sub>2</sub> Et | 5.64       | 70.3 | 5.0   | 2.3    | 5.79        | 69.7 | 5.0   | 3.6    |
| <b>2h</b> | PMP <sup>b</sup> | MeO            | Me                               | CH <sub>2</sub> Ts                 | 5.41       | 70.3 | 5.1   | 5.0    | 5.66        | 68.7 | 5.3   | 3.3    |

<sup>a</sup>Chemical shifts and vicinal coupling constants from  $^1\text{H}$  NMR spectra (300 MHz) and  $^{13}\text{C}$  NMR spectra (75 MHz) recorded at 300 MHz using CDCl<sub>3</sub> as solvent. <sup>b</sup>PMP = 4-MeO-C<sub>6</sub>H<sub>4</sub>. <sup>c</sup>Phth = Phtalimido.

**Table S2.** Representative chemical shifts ( $\delta$ , ppm) and vicinal coupling constants ( $^3J$ , Hz) of  $^1\text{H}$  and  $^{13}\text{C}$  NMR of compounds **3**<sup>a</sup>

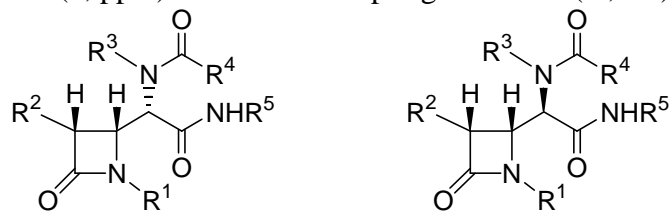

*syn-3*

*anti-3*

| Comp.     | R <sup>1</sup>   | R <sup>2</sup> | R <sup>3</sup>   | R <sup>4</sup>                    | R <sup>5</sup>                     | <i>syn</i>     |      |       |                | <i>anti</i>    |      |       |                |
|-----------|------------------|----------------|------------------|-----------------------------------|------------------------------------|----------------|------|-------|----------------|----------------|------|-------|----------------|
|           |                  |                |                  |                                   |                                    | $\delta$       |      | $^3J$ |                | $\delta$       |      | $^3J$ |                |
|           |                  |                |                  |                                   |                                    | H4'            | C4'  | H3-H4 | H4-H4'         | H4'            | C4'  | H3-H4 | H4-H4'         |
| <b>3c</b> | PMP <sup>b</sup> | MeO            | 2-propenyl       | Me                                | Bn                                 | – <sup>d</sup> | 56.1 | 5.0   | – <sup>d</sup> | – <sup>d</sup> | 57.3 | 5.0   | – <sup>d</sup> |
| <b>3d</b> | PMP <sup>b</sup> | MeO            | 2-propenyl       | CH <sub>2</sub> Br                | Bn                                 | 5.16           | 57.9 | 5.0   | 9.2            | 4.80           | 58.5 | 5.1   | 9.2            |
| <b>3e</b> | PMP <sup>b</sup> | MeO            | 2-propenyl       | CH <sub>2</sub> Phth <sup>c</sup> | Bn                                 | 5.12           | 58.3 | 5.0   | 9.1            | 4.59           | 59.8 | 5.0   | 9.5            |
| <b>3f</b> | PMP <sup>b</sup> | MeO            | 2-propenyl       | Me                                | <i>t</i> -Bu                       | 5.11           | 57.9 | 5.0   | 8.6            | 4.93           | 58.0 | 4.7   | 9.2            |
| <b>3g</b> | Bn               | MeO            | 2-propenyl       | Me                                | Bn                                 | 5.25           | 56.5 | 5.0   | 10.0           | –              | –    | –     | –              |
| <b>3h</b> | PMP <sup>b</sup> | PhO            | 2-propenyl       | Me                                | Bn                                 | 5.34           | 57.1 | 4.8   | 9.6            | 5.23           | 58.5 | 4.5   | 9.8            |
| <b>3i</b> | 2-propenyl       | PhO            | 2-propenyl       | Me                                | Bn                                 | 5.53           | 56.2 | 4.9   | 10.0           | 5.09           | 58.1 | 4.7   | 10.2           |
| <b>3j</b> | 2-propenyl       | PhO            | 2-propenyl       | CH <sub>2</sub> Br                | Bn                                 | 5.42           | 57.5 | 5.0   | 10.1           | 5.29           | 58.0 | 5.0   | 10.2           |
| <b>3k</b> | PMP <sup>b</sup> | MeO            | PMP <sup>b</sup> | Me                                | Bn                                 | 5.21           | 58.1 | 5.0   | 9.8            | 4.95           | 56.8 | 5.0   | 9.2            |
| <b>3l</b> | 2-propenyl       | PhO            | PMP <sup>b</sup> | Me                                | Bn                                 | 5.71           | 58.9 | 4.4   | 8.9            | 5.62           | 57.1 | 4.8   | 10.6           |
| <b>3m</b> | 2-propenyl       | PhO            | PMP <sup>b</sup> | CH <sub>2</sub> Phth <sup>c</sup> | CH <sub>2</sub> CO <sub>2</sub> Et | 5.64           | 59.8 | 5.1   | 8.6            | 5.59           | 57.5 | 5.0   | 10.3           |

<sup>a</sup>Chemical shifts and vicinal coupling constants from  $^1\text{H}$  NMR spectra (300 MHz) and  $^{13}\text{C}$  NMR spectra (75 MHz) recorded at 300 MHz using CDCl<sub>3</sub> as solvent. <sup>b</sup>PMP = 4-MeO-C<sub>6</sub>H<sub>4</sub>. <sup>c</sup> Phth = Phtalimido. <sup>d</sup> It could not be measured because the corresponding signals are observed as a complex multiplet.

$^1\text{H}$  NMR in  $(\text{CDCl}_2)_2$  of compound *syn*-(+)-**3a** at different temperatures

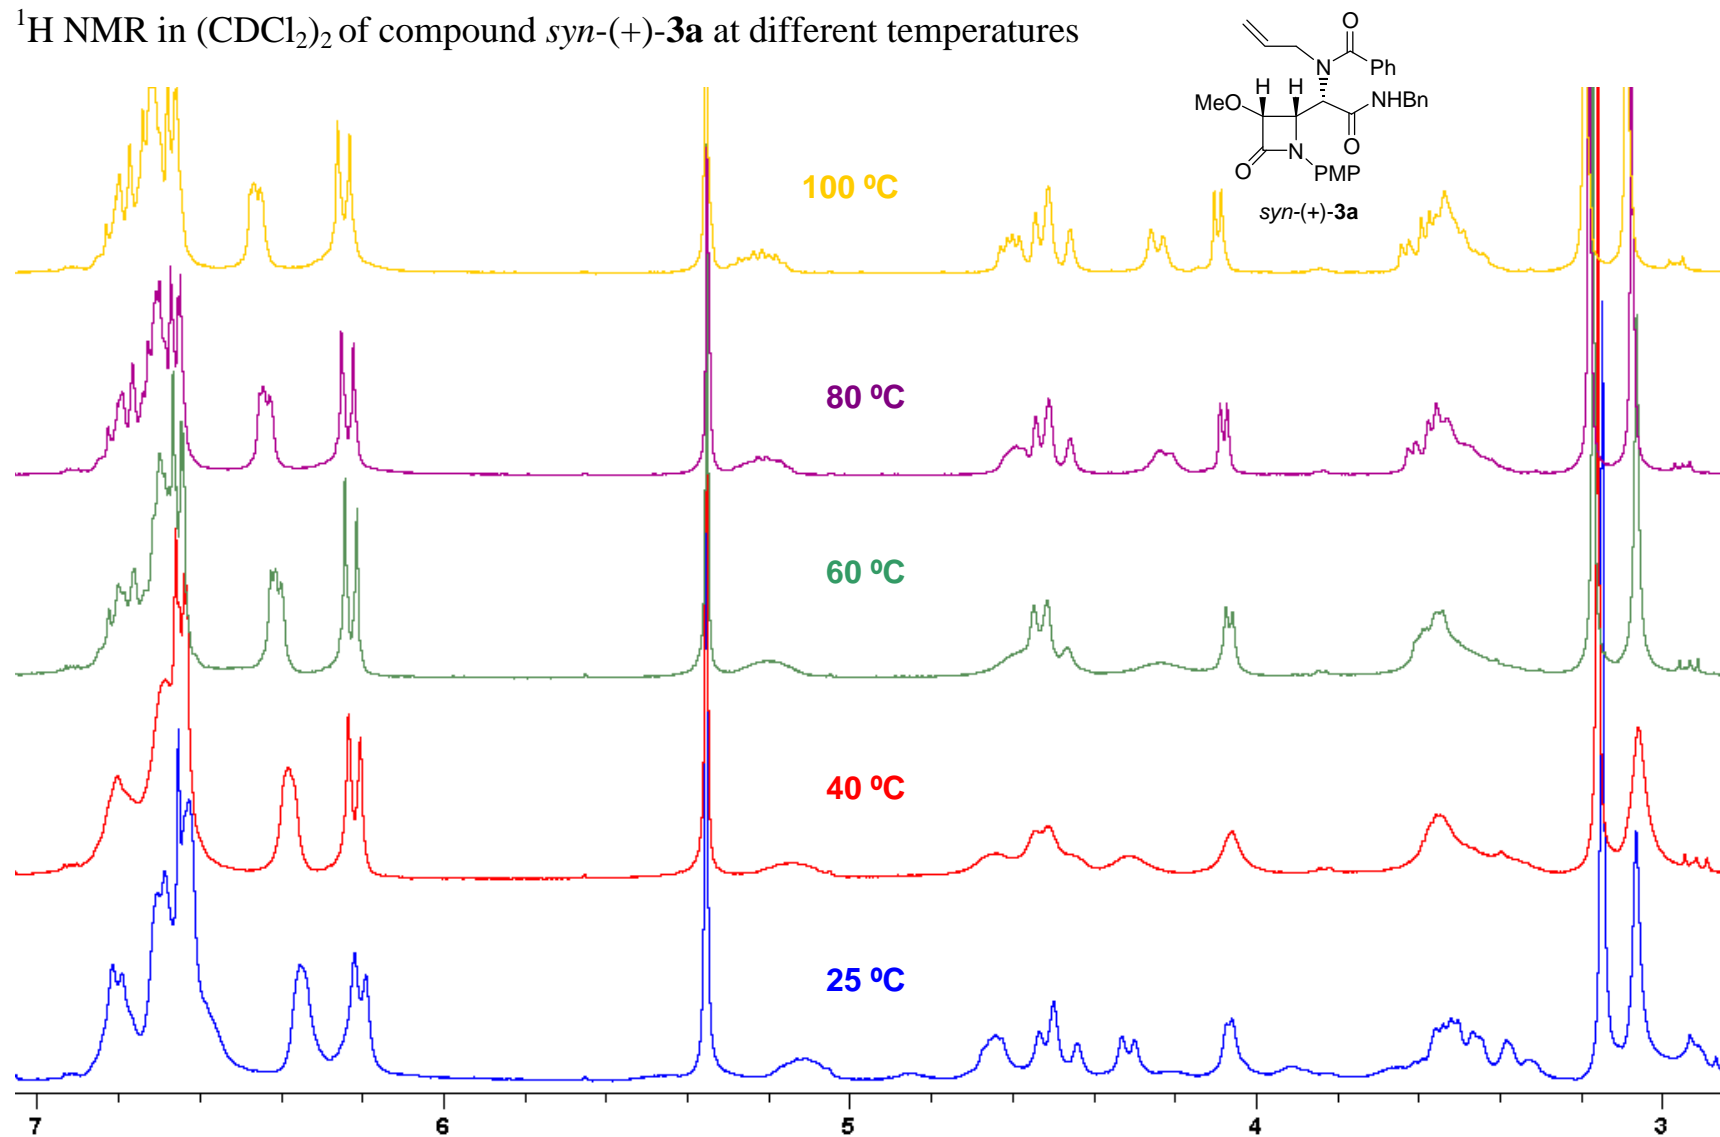

$^1\text{H}$  NMR in  $(\text{CDCl}_2)_2$  of compound *anti*-(+)-**3b** at different temperatures

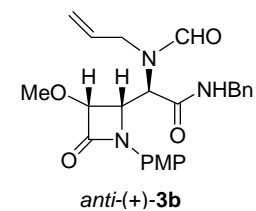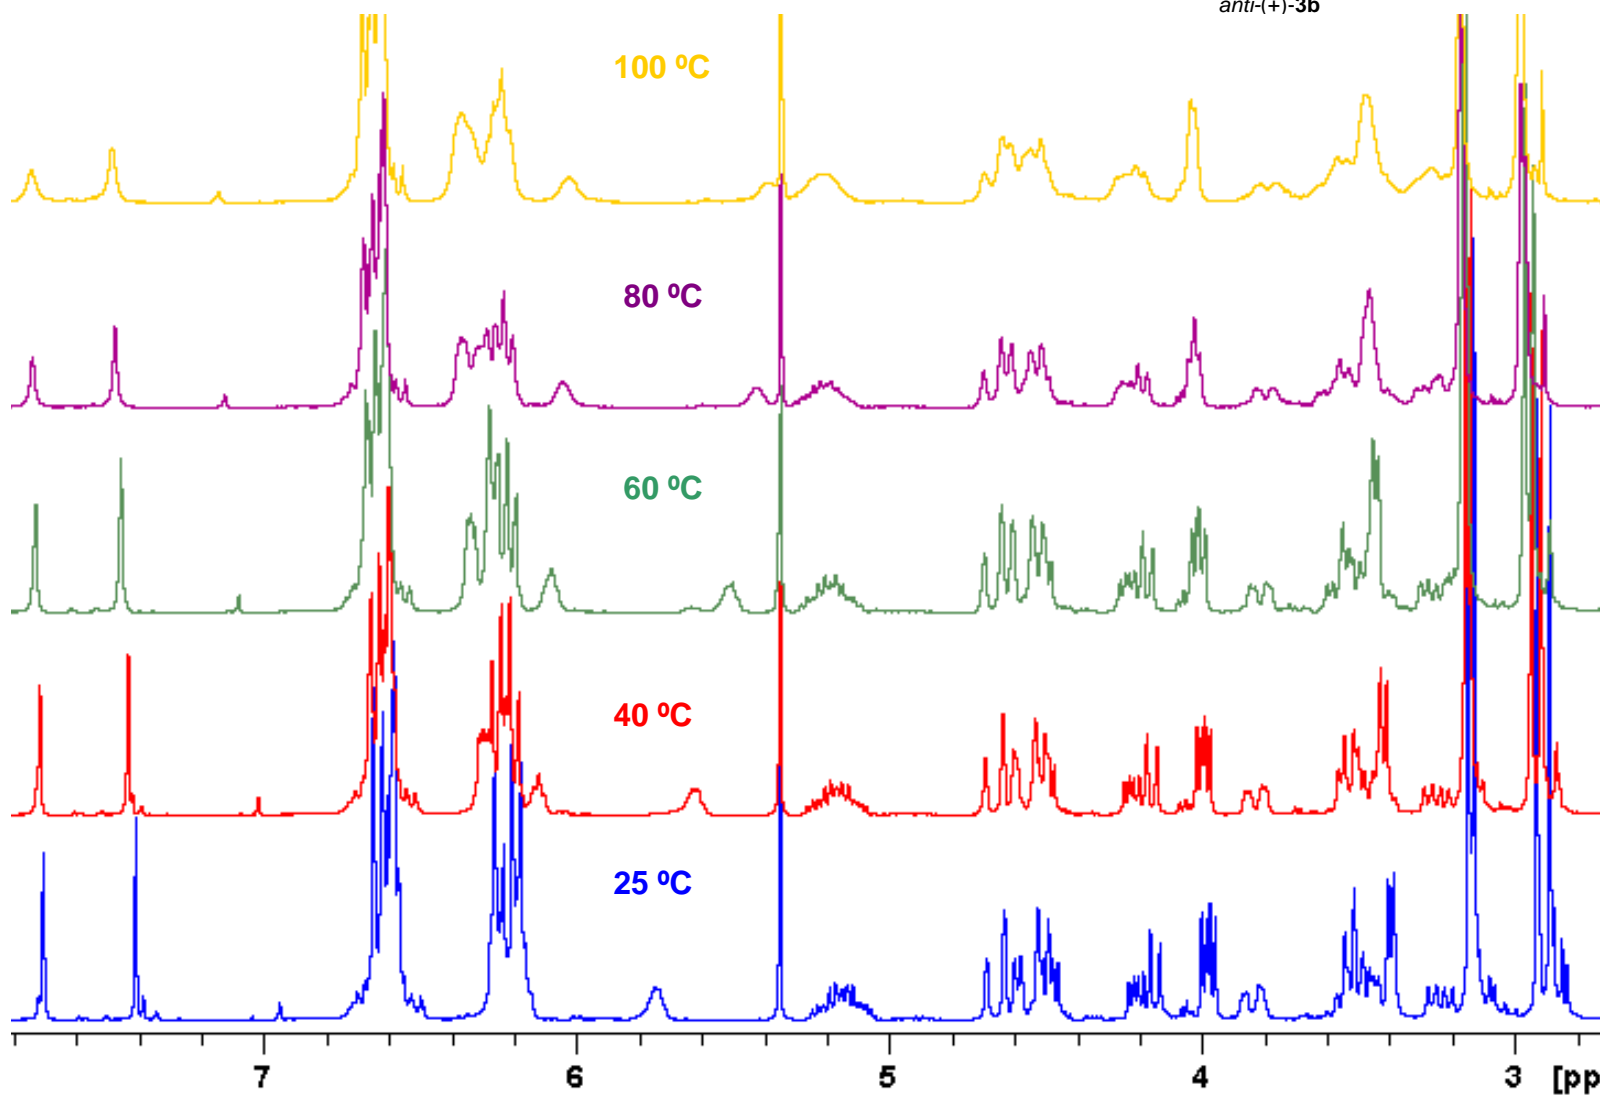

# $^1\text{H}$ and $^{13}\text{C}$ NMR spectra for all new compounds

300 MHz ( $\text{CDCl}_3$ ,  $25^\circ\text{C}$ )

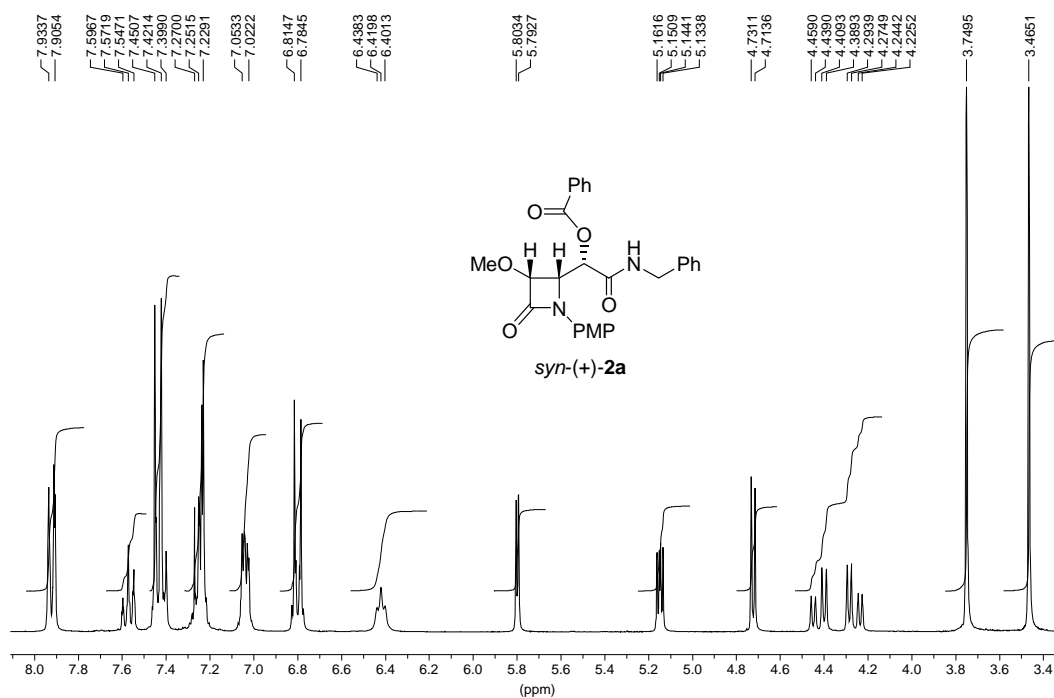

75 MHz ( $\text{CDCl}_3$ ,  $25^\circ\text{C}$ )

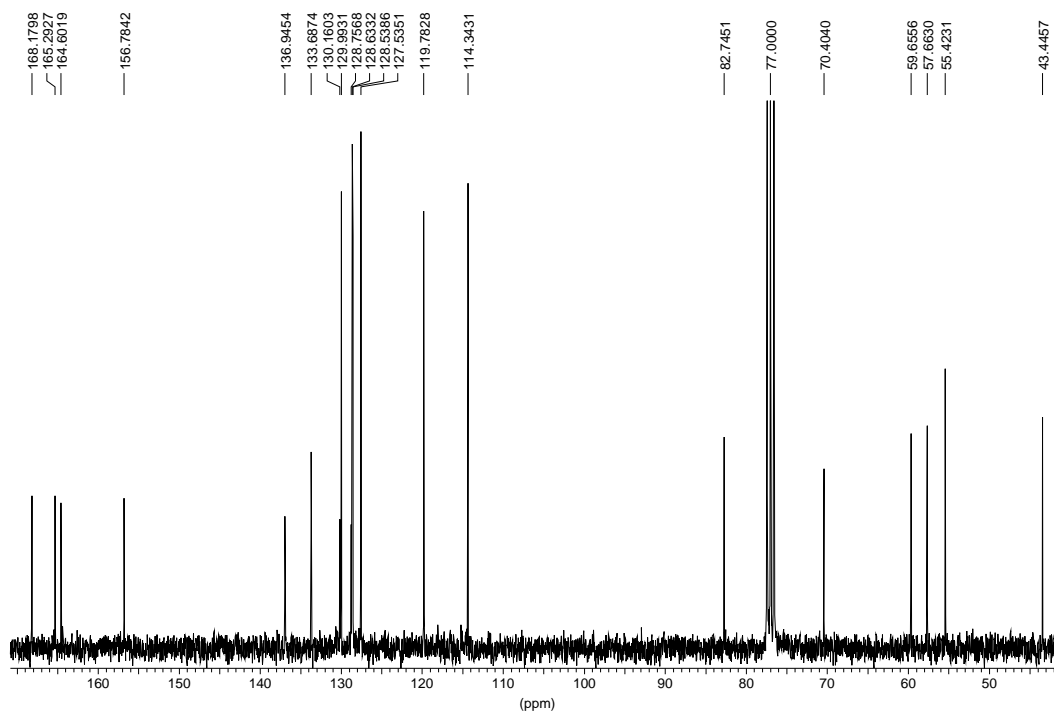



300 MHz (CDCl<sub>3</sub>, 25°C)

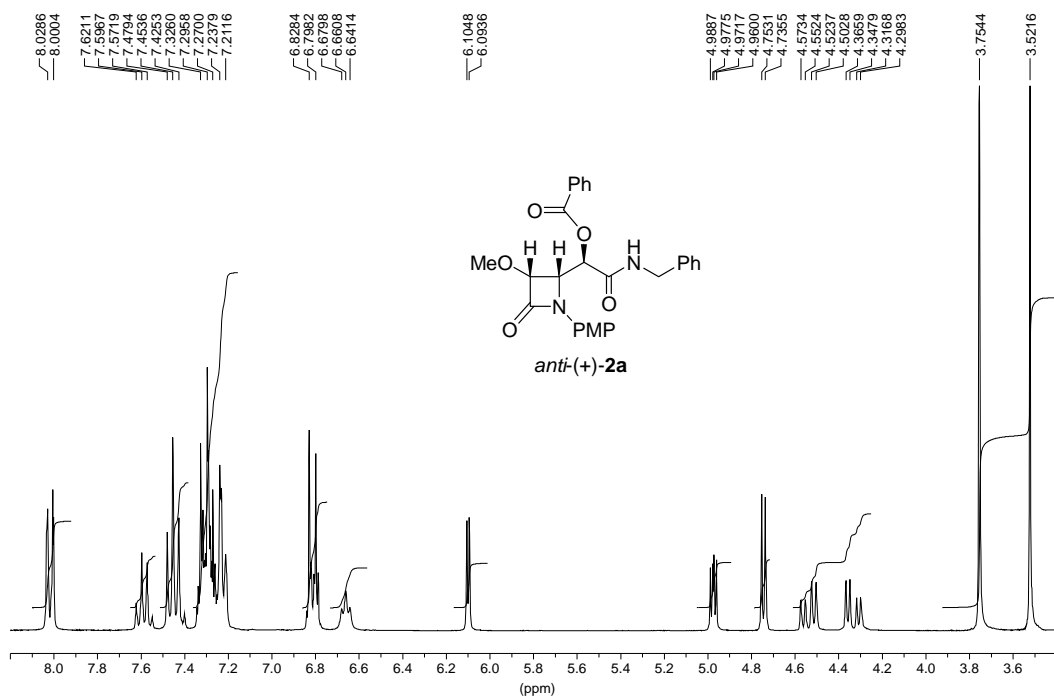

75 MHz (CDCl<sub>3</sub>, 25°C)

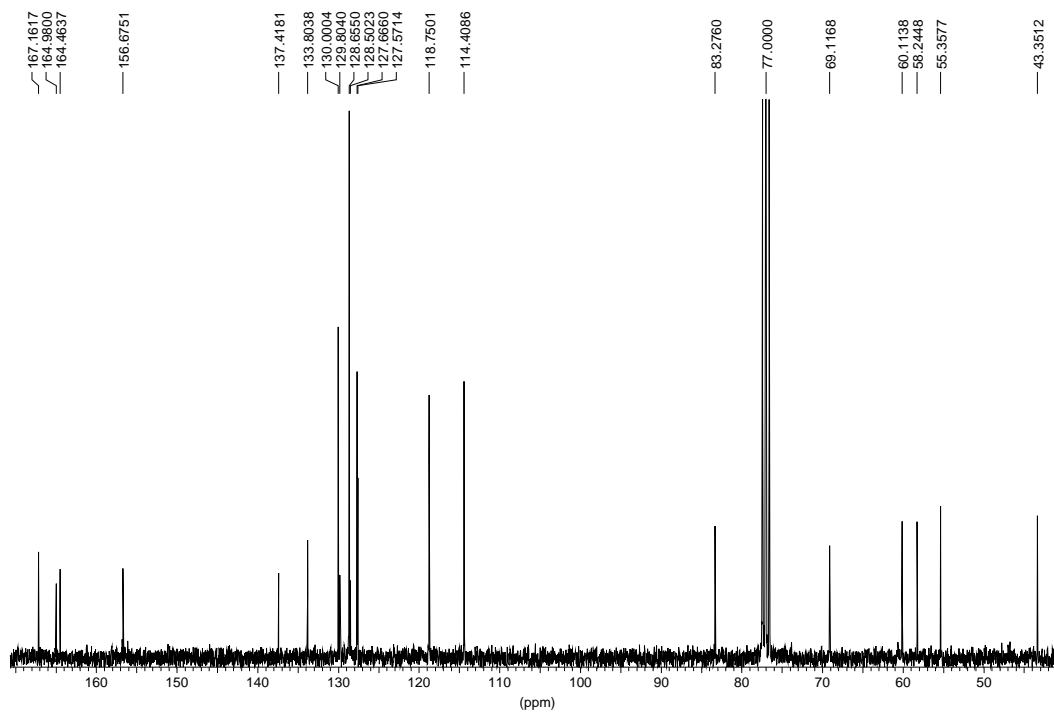

300 MHz (CDCl<sub>3</sub>, 25°C)

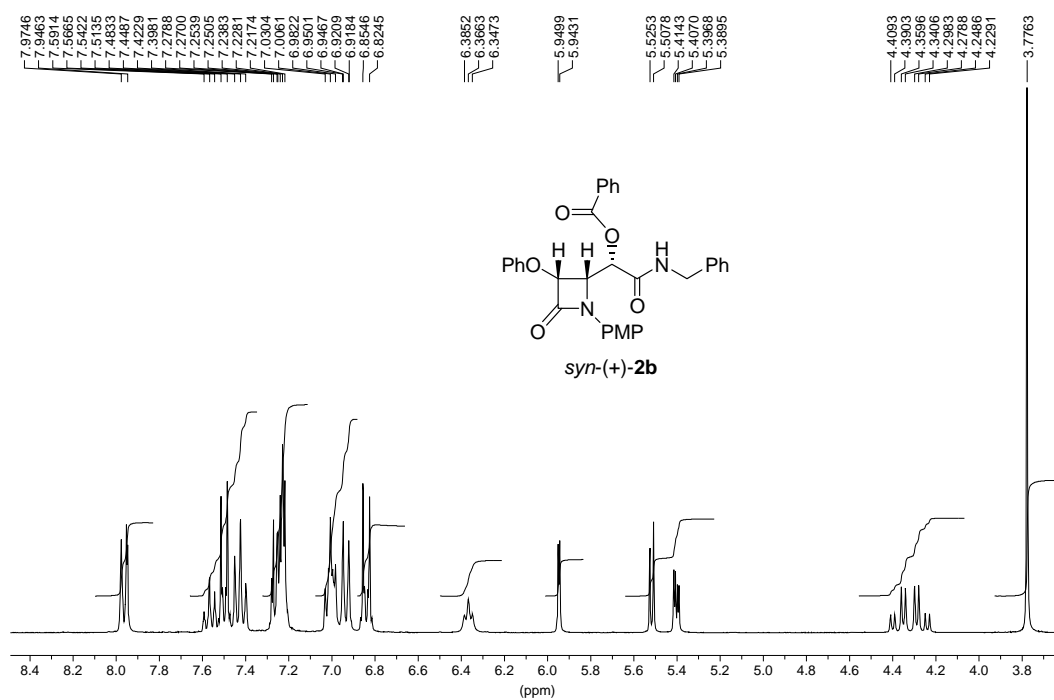

75 MHz (CDCl<sub>3</sub>, 25°C)

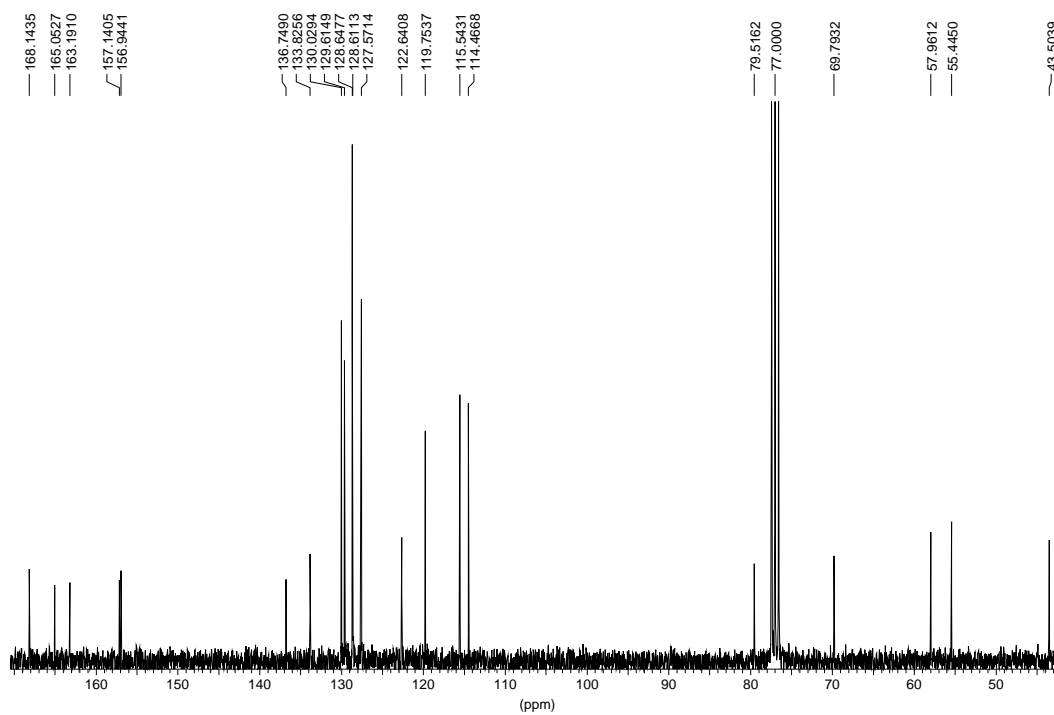

300 MHz (CDCl<sub>3</sub>, 25°C)

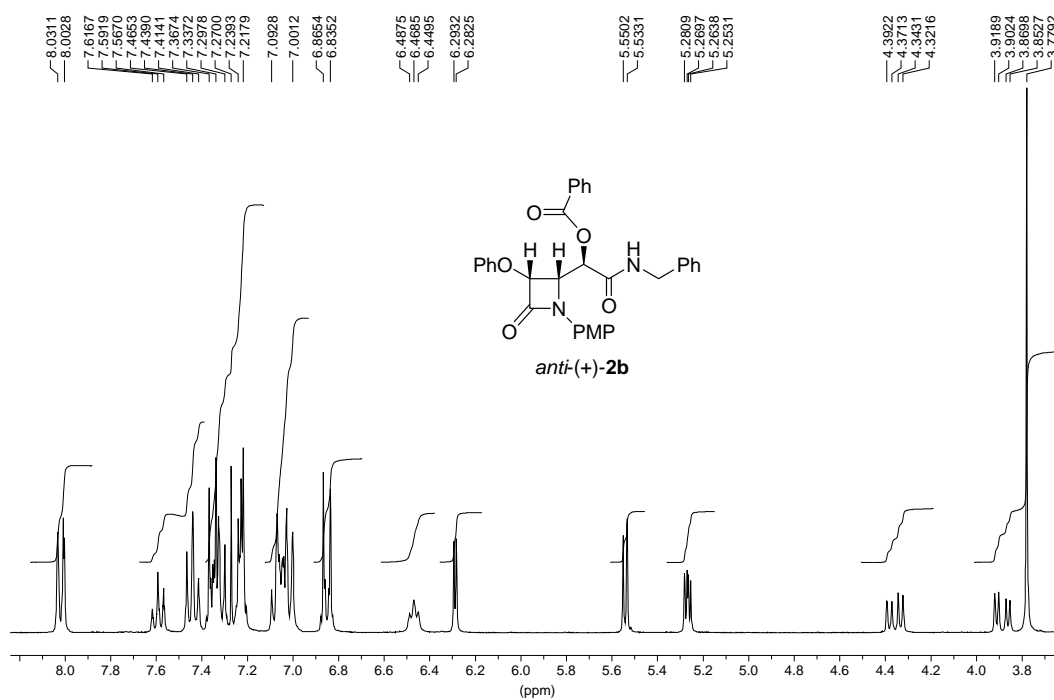

75 MHz (CDCl<sub>3</sub>, 25°C)

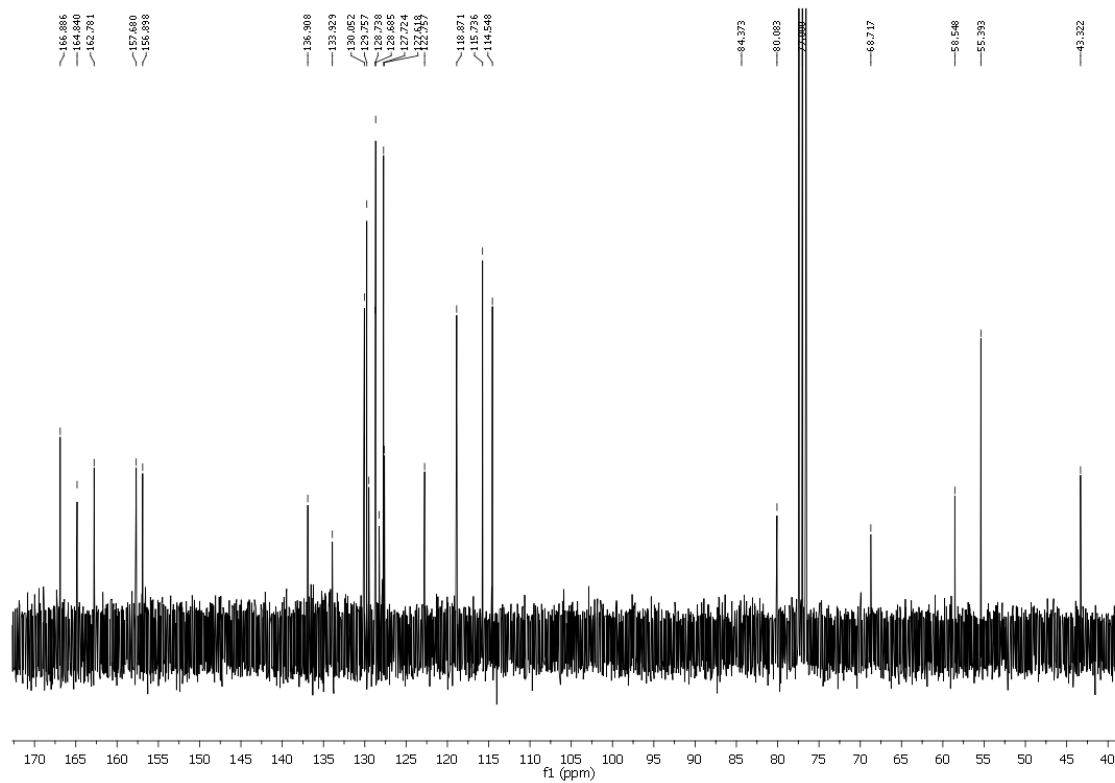

300 MHz (CDCl<sub>3</sub>, 25°C)

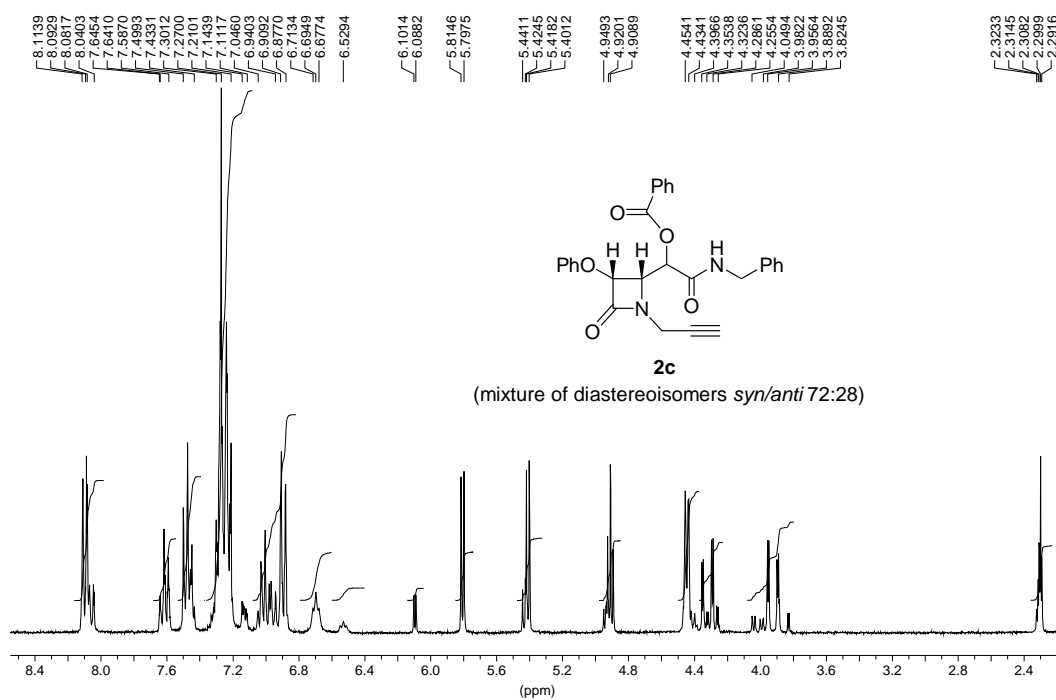

75 MHz (CDCl<sub>3</sub>, 25°C)

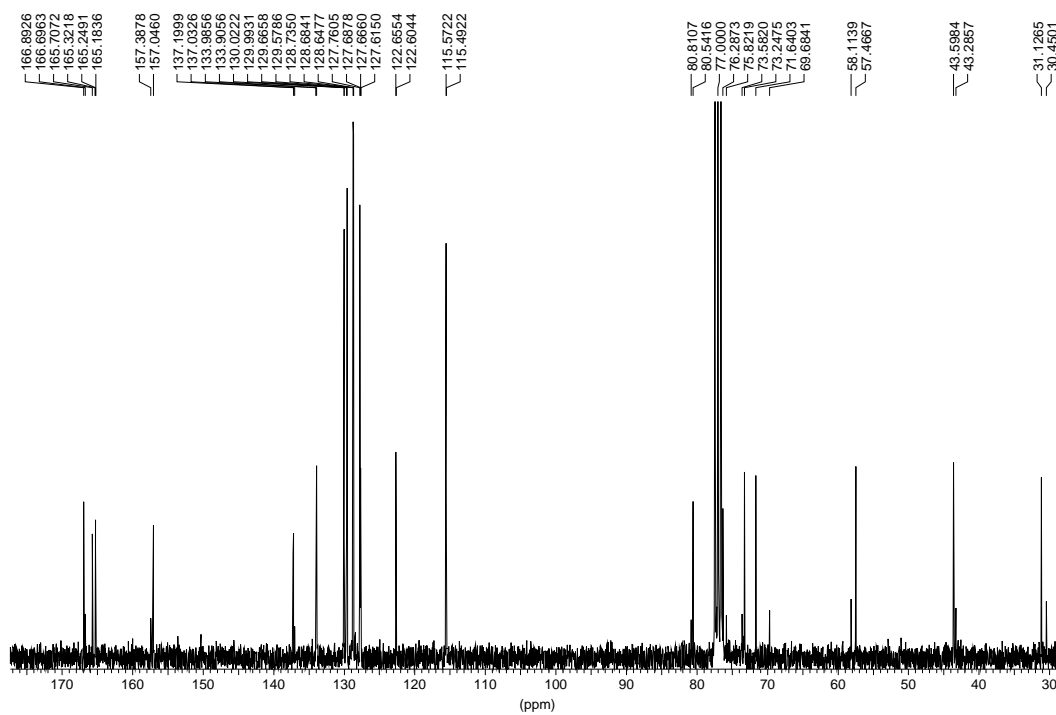

300 MHz (CDCl<sub>3</sub>, 25°C)

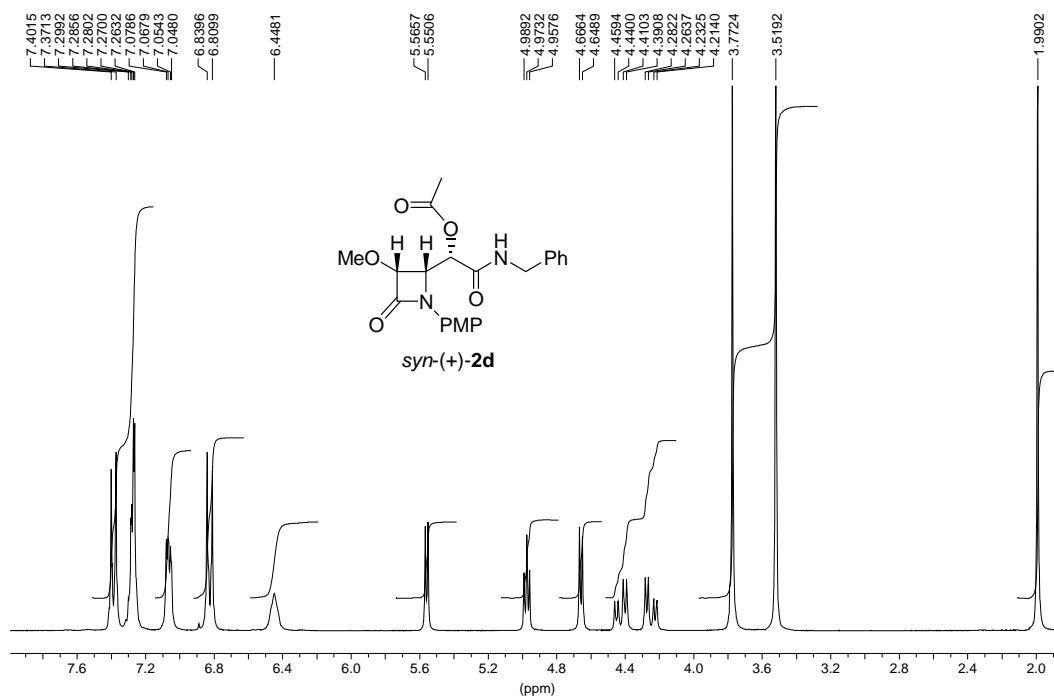

75 MHz (CDCl<sub>3</sub>, 25°C)

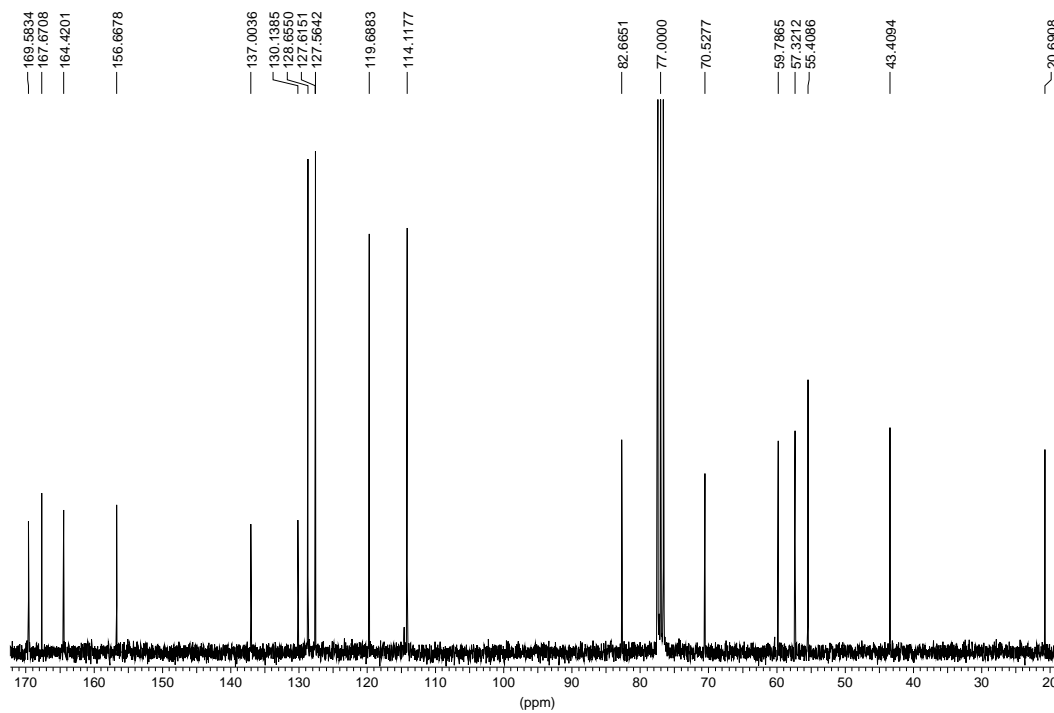

300 MHz (CDCl<sub>3</sub>, 25°C)

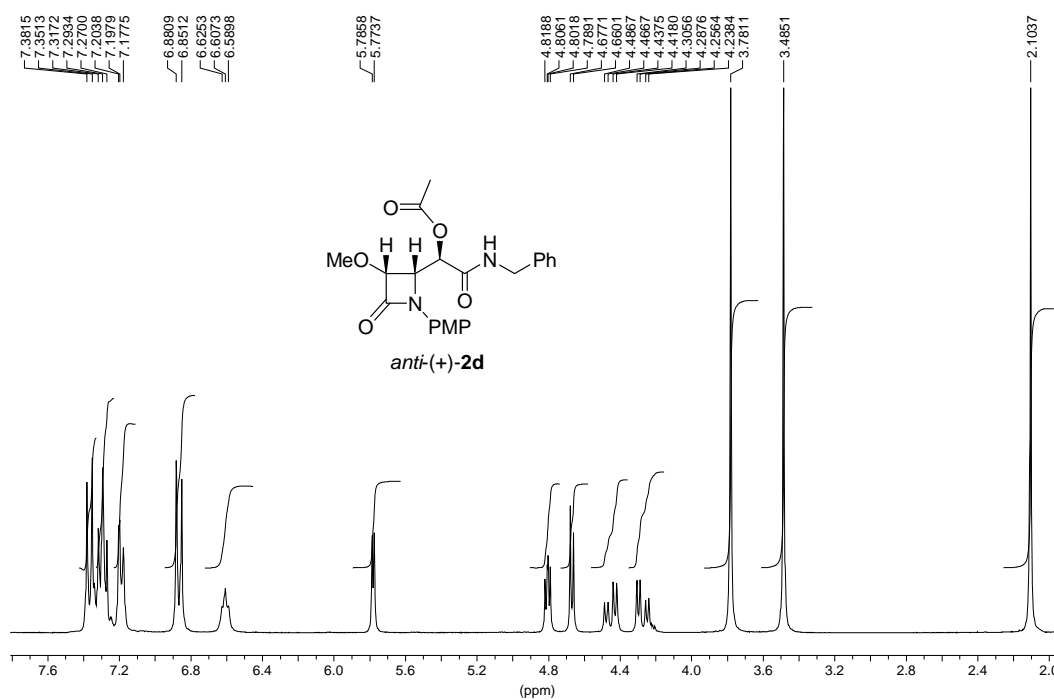

75 MHz (CDCl<sub>3</sub>, 25°C)

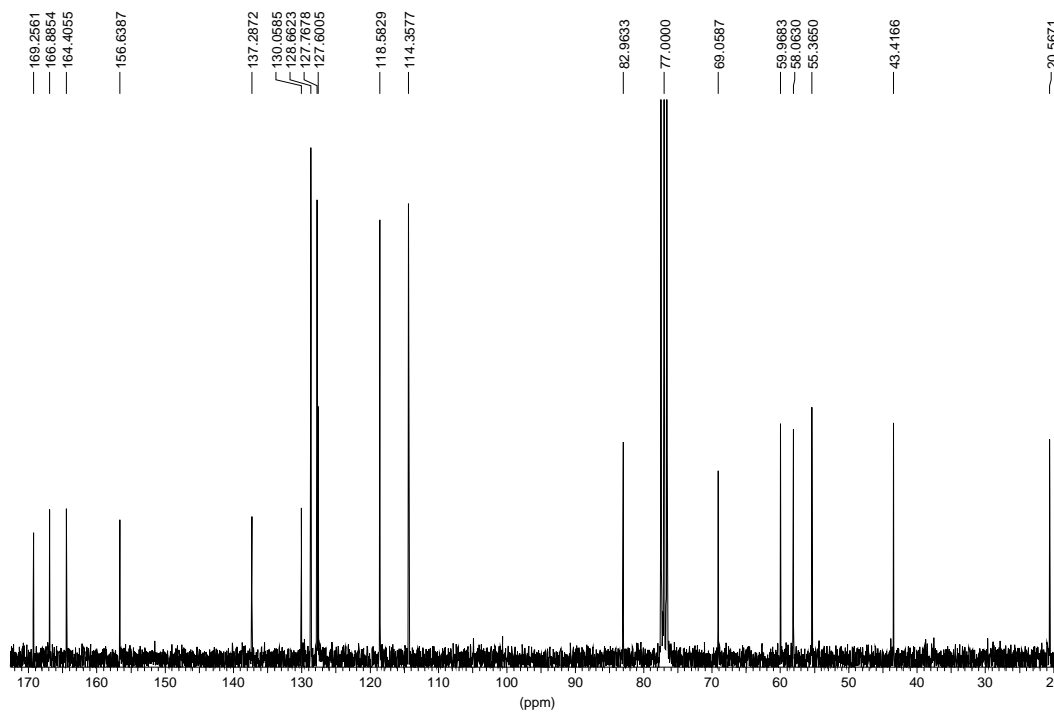

300 MHz (CDCl<sub>3</sub>, 25°C)

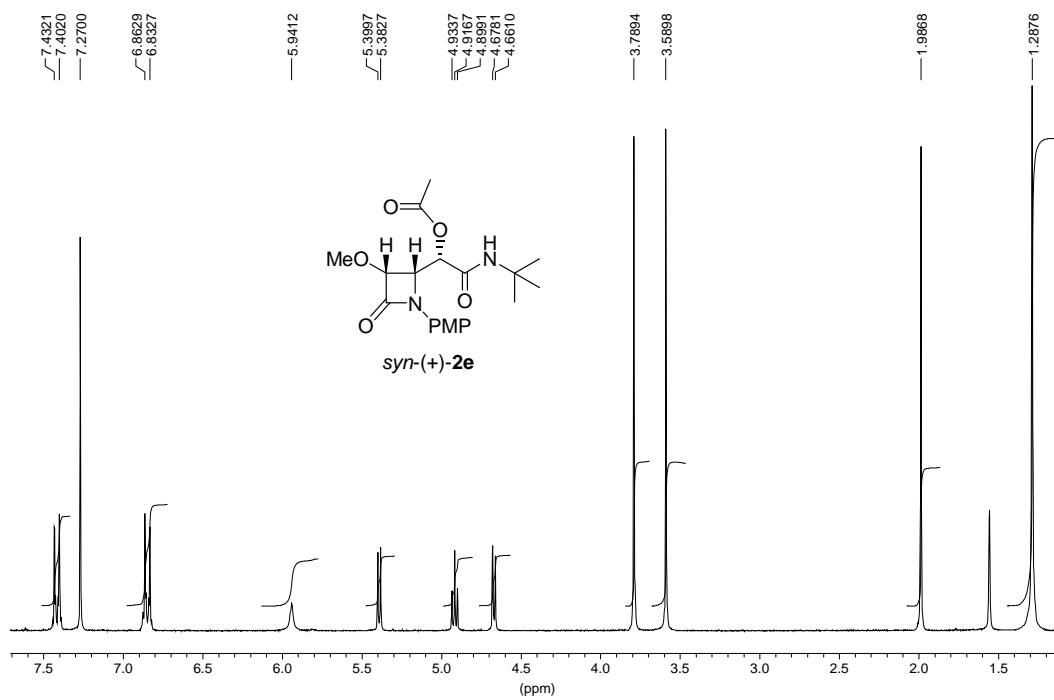

75 MHz (CDCl<sub>3</sub>, 25°C)

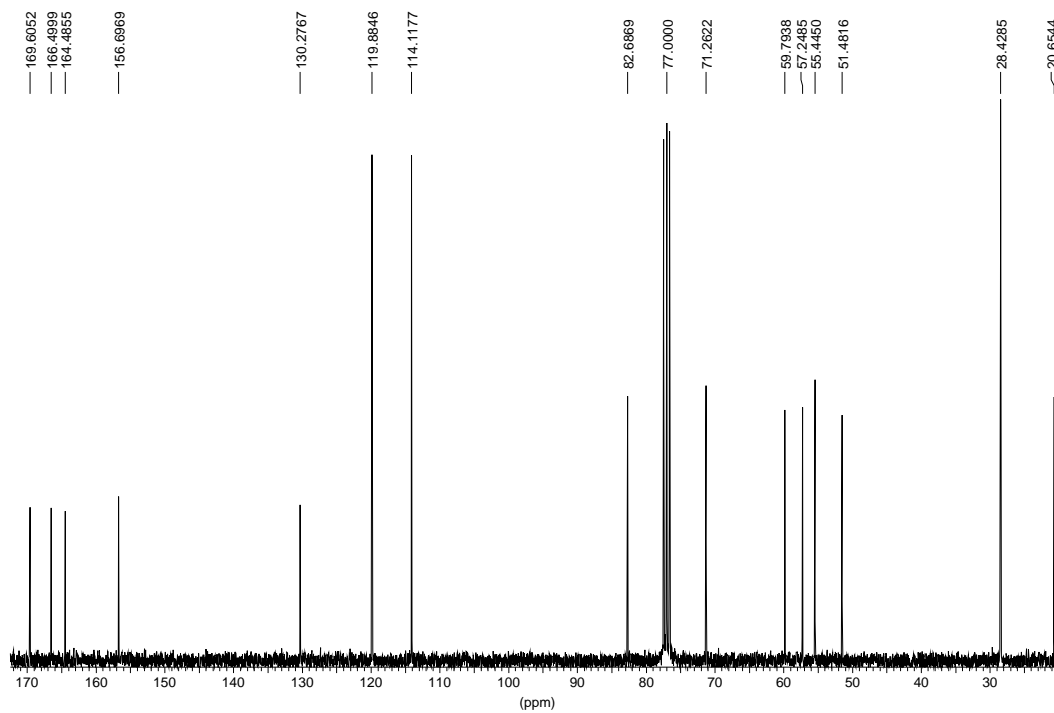

300 MHz (CDCl<sub>3</sub>, 25°C)

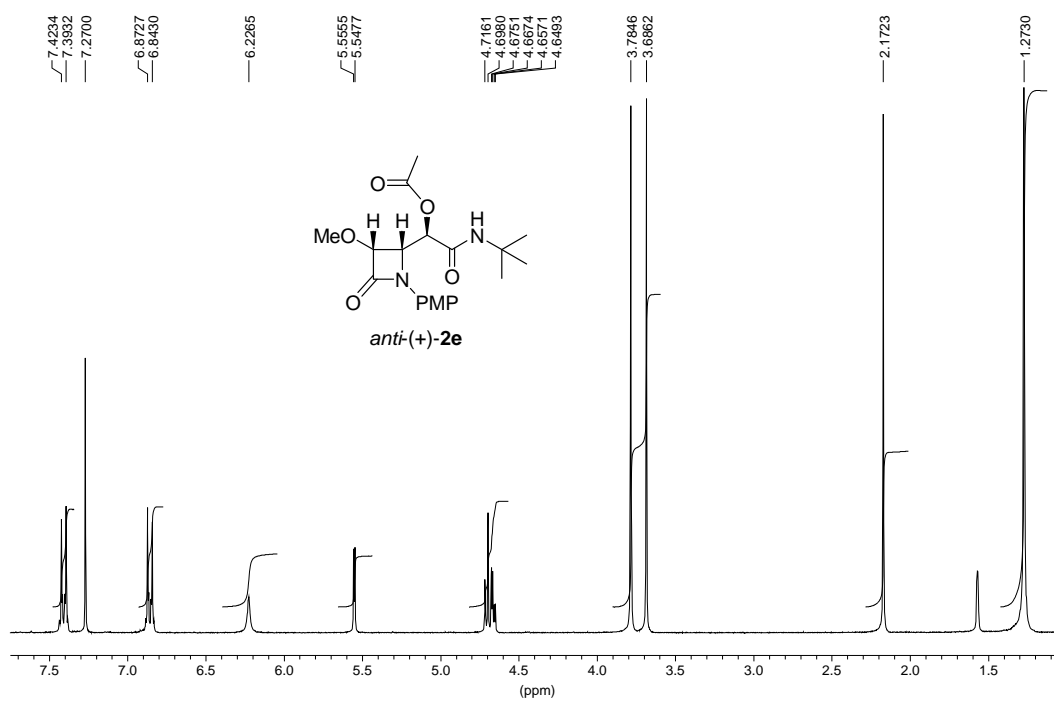

75 MHz (CDCl<sub>3</sub>, 25°C)

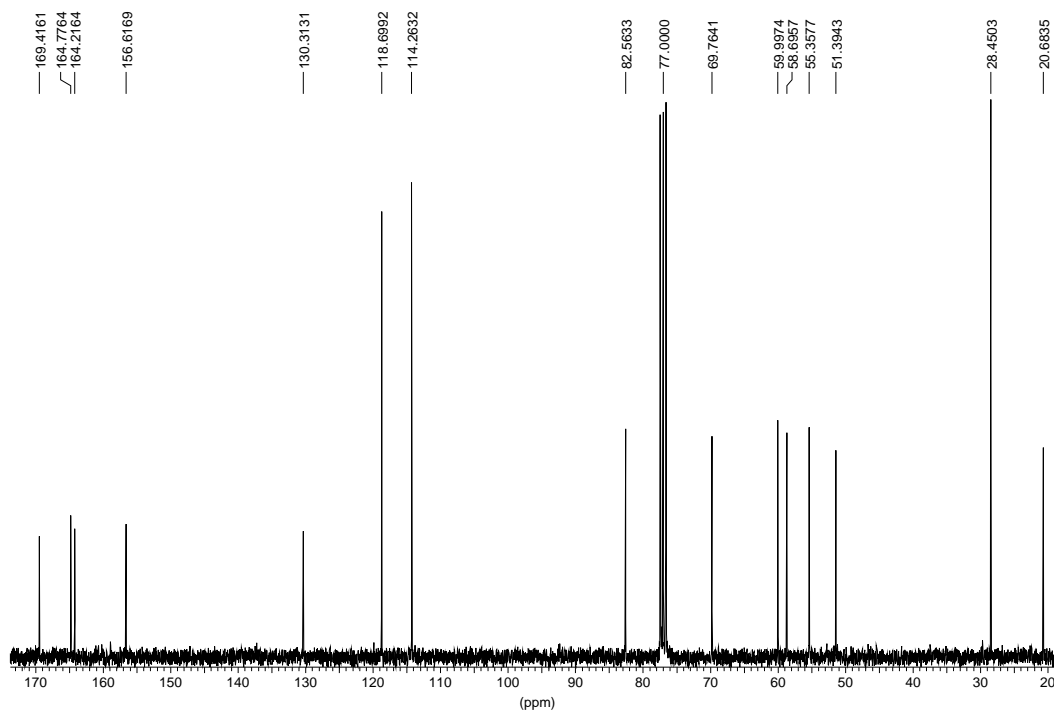



300 MHz (CDCl<sub>3</sub>, 25°C)

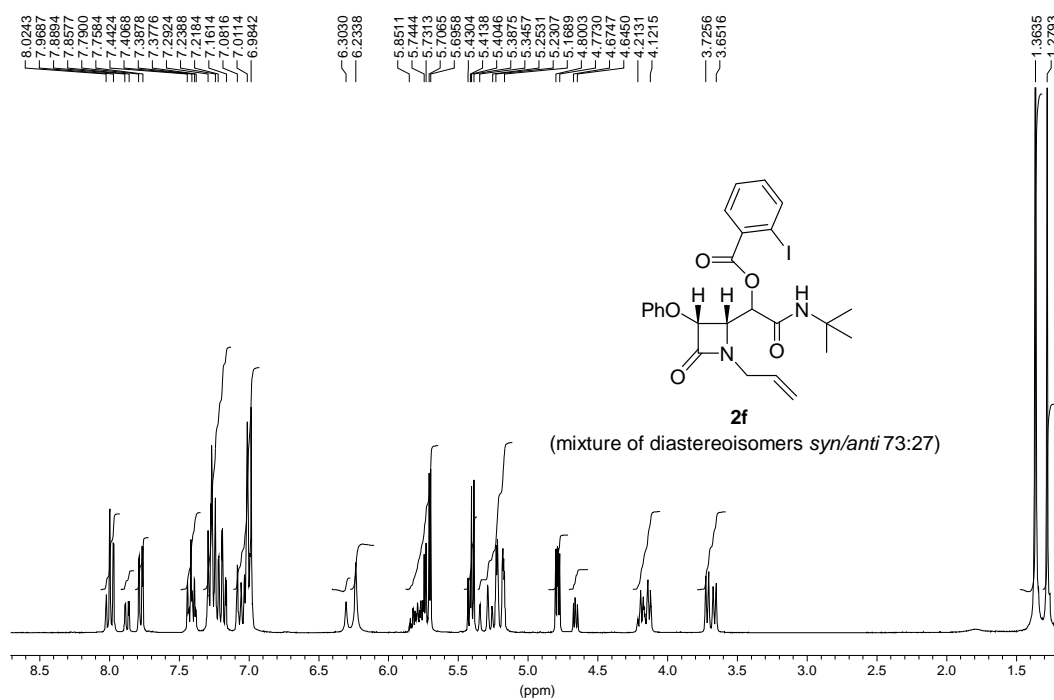

75 MHz (CDCl<sub>3</sub>, 25°C)

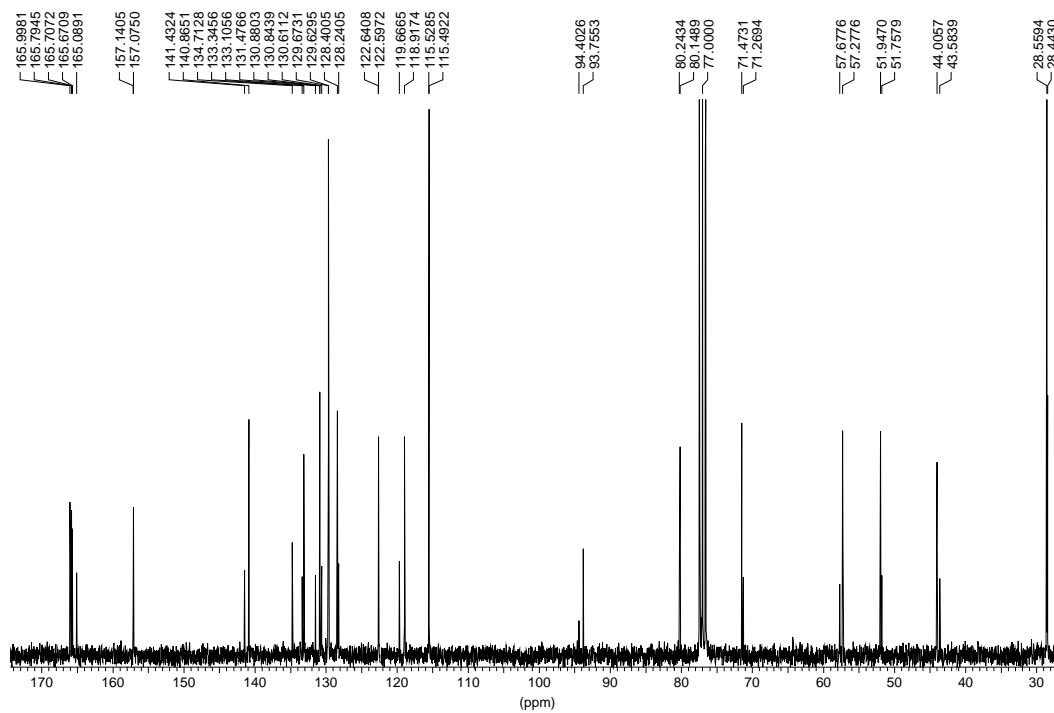

300 MHz (CDCl<sub>3</sub>, 25°C)

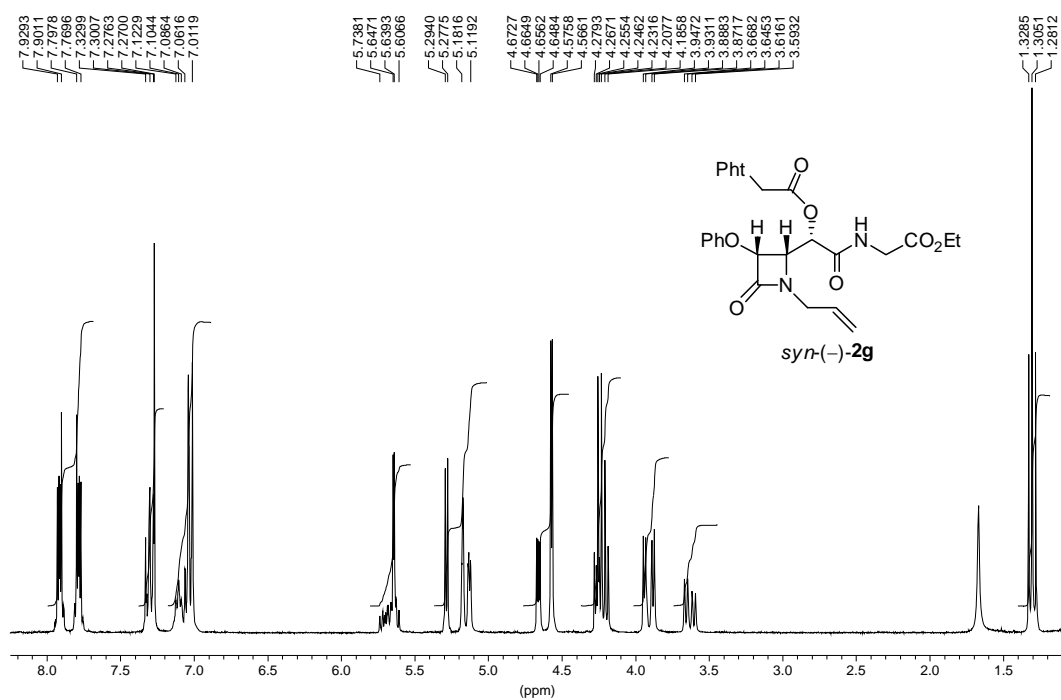

75 MHz (CDCl<sub>3</sub>, 25°C)

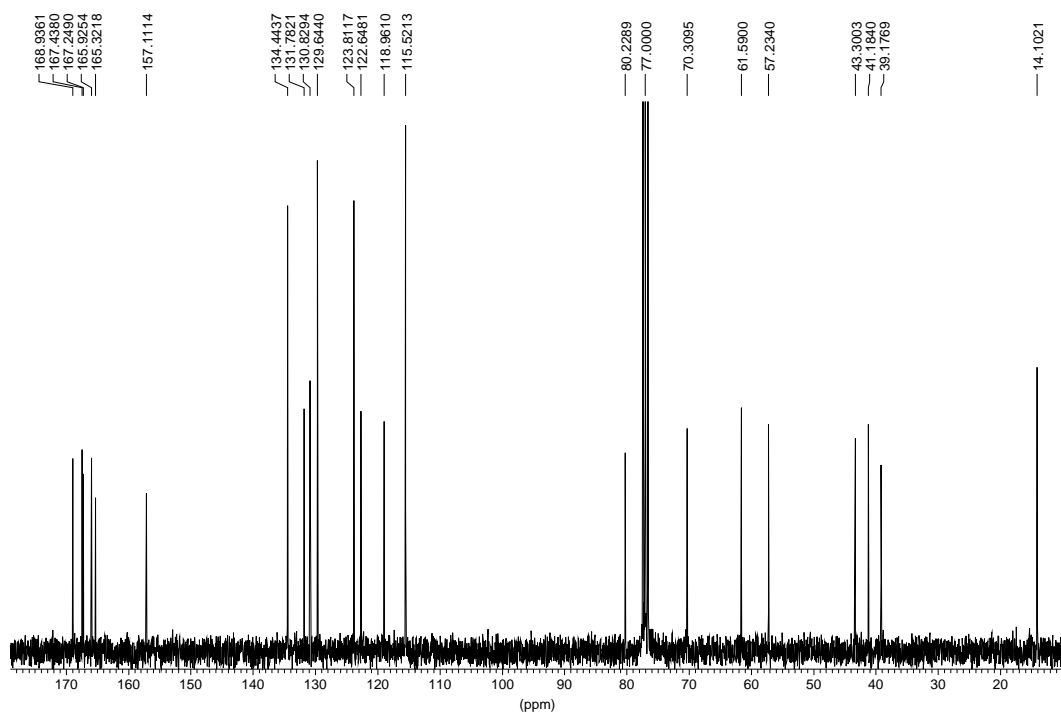

300 MHz (CDCl<sub>3</sub>, 25°C)

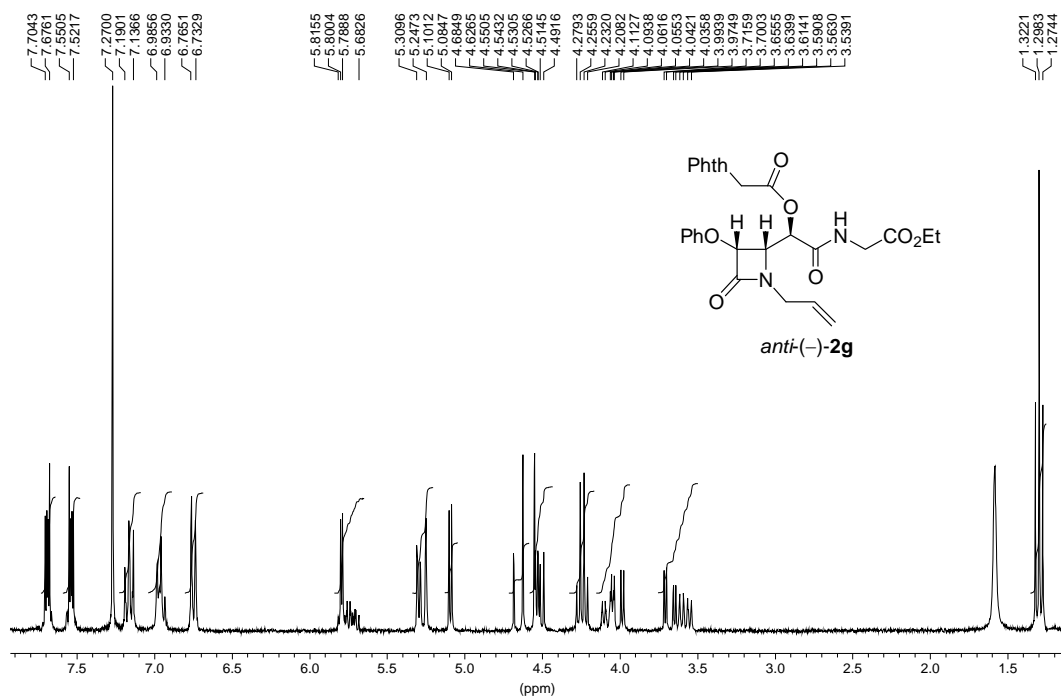

75 MHz (CDCl<sub>3</sub>, 25°C)

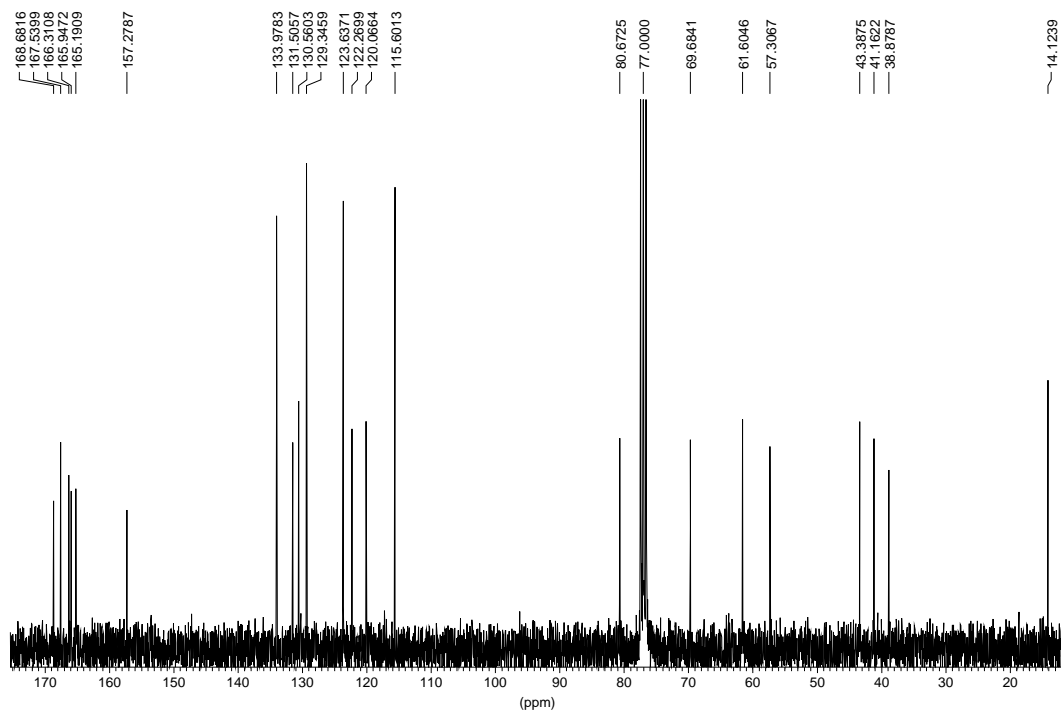

300 MHz (CDCl<sub>3</sub>, 25°C)

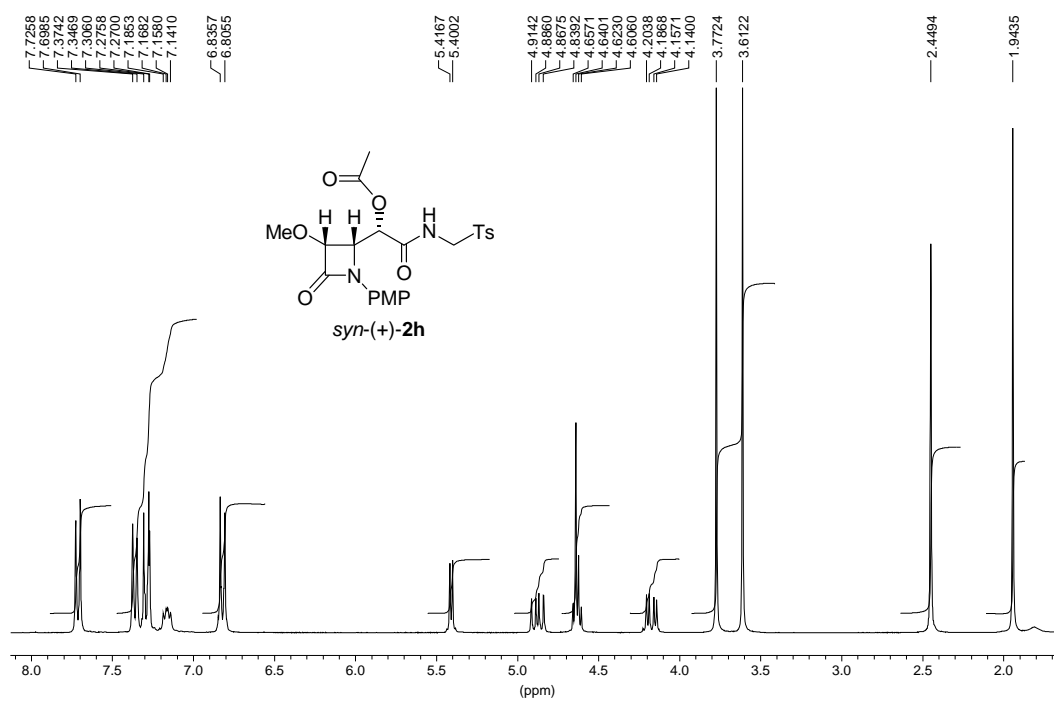

75 MHz (CDCl<sub>3</sub>, 25°C)

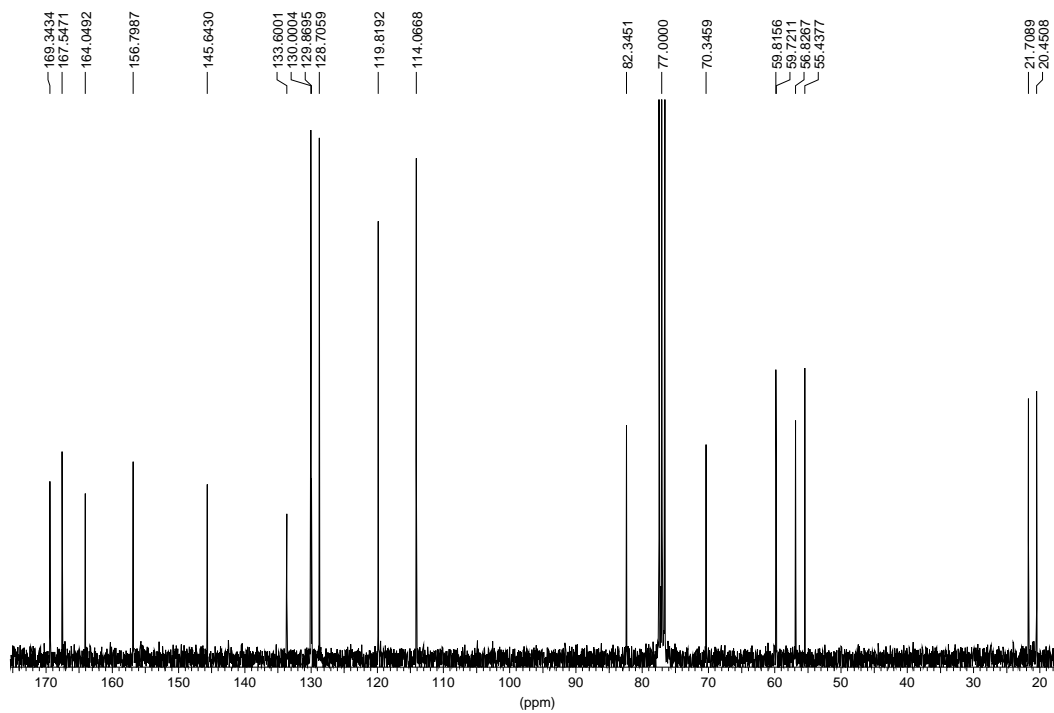

300 MHz (CDCl<sub>3</sub>, 25°C)

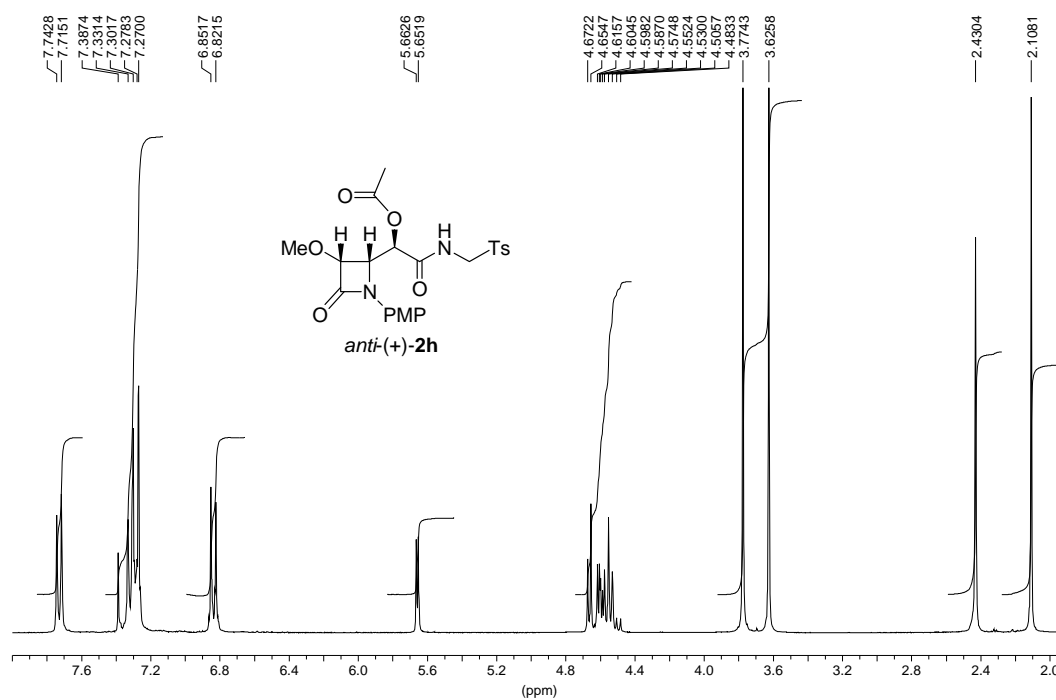

75 MHz (CDCl<sub>3</sub>, 25°C)

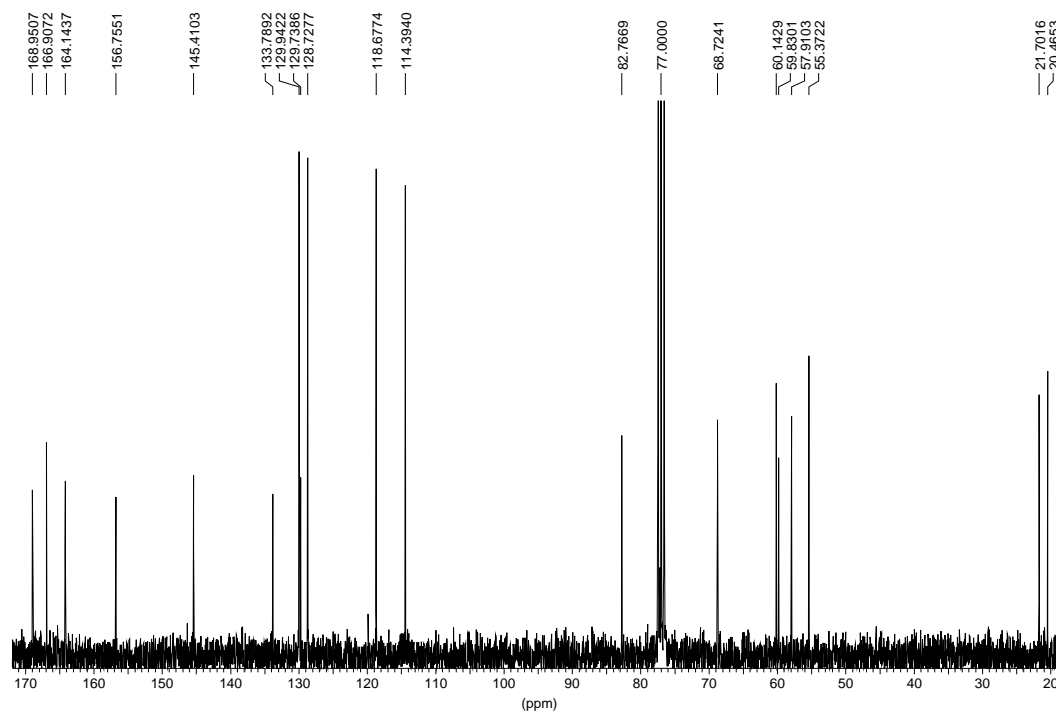

300 MHz (C<sub>2</sub>D<sub>2</sub>Cl<sub>4</sub>, 100°C)

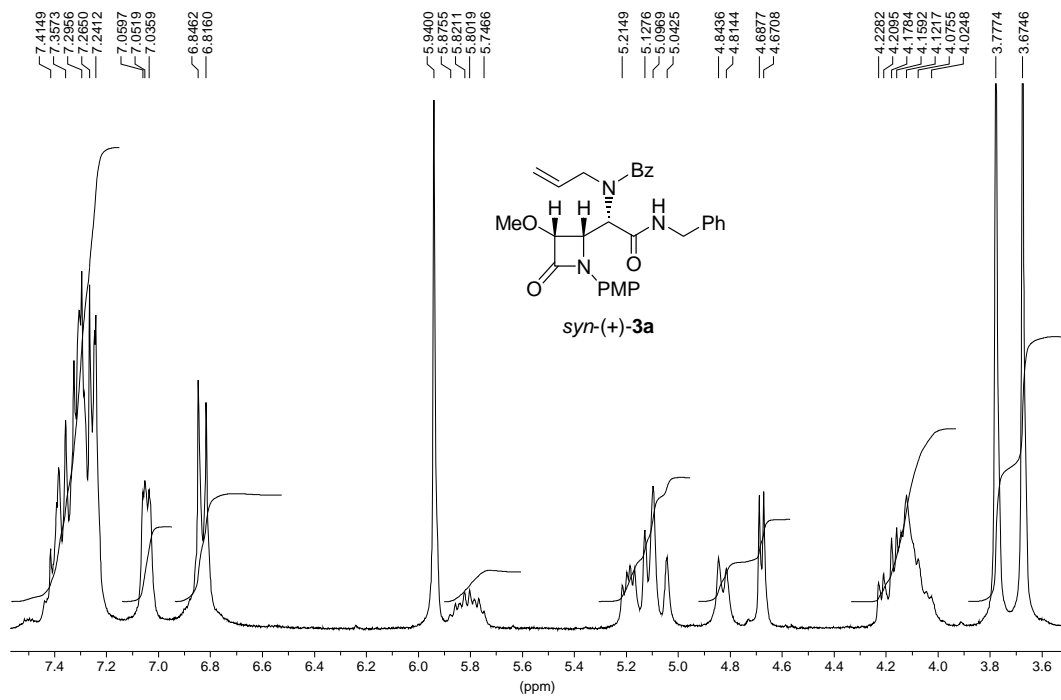

75 MHz (C<sub>2</sub>D<sub>2</sub>Cl<sub>4</sub>, 100°C)

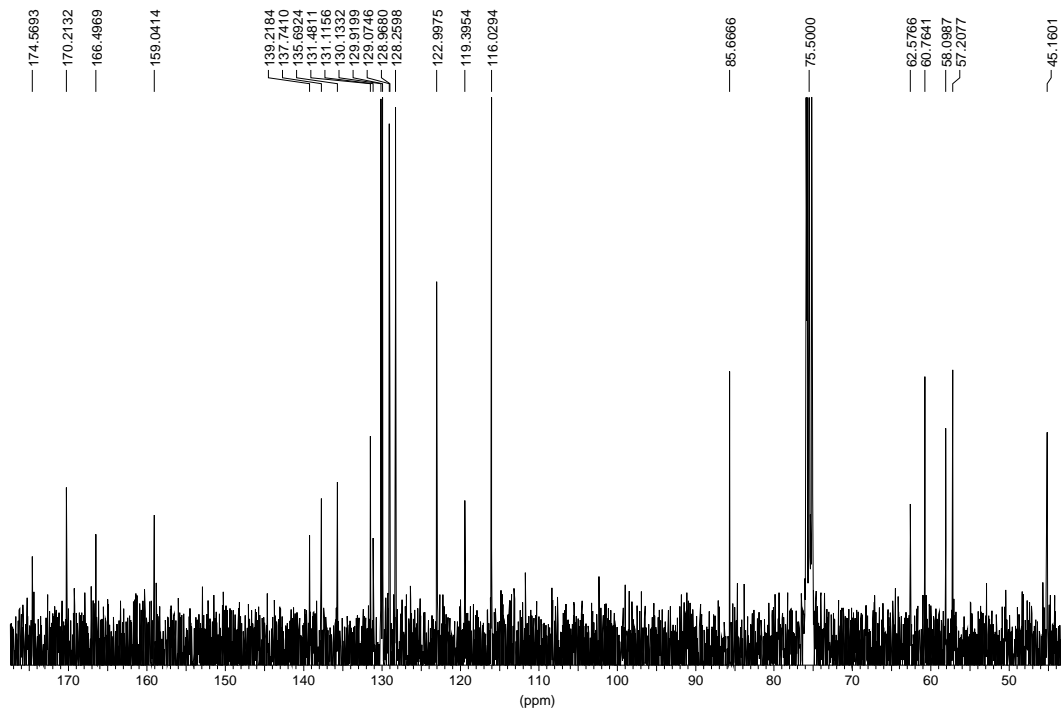

300 MHz (C<sub>2</sub>D<sub>2</sub>Cl<sub>4</sub>, 100°C)

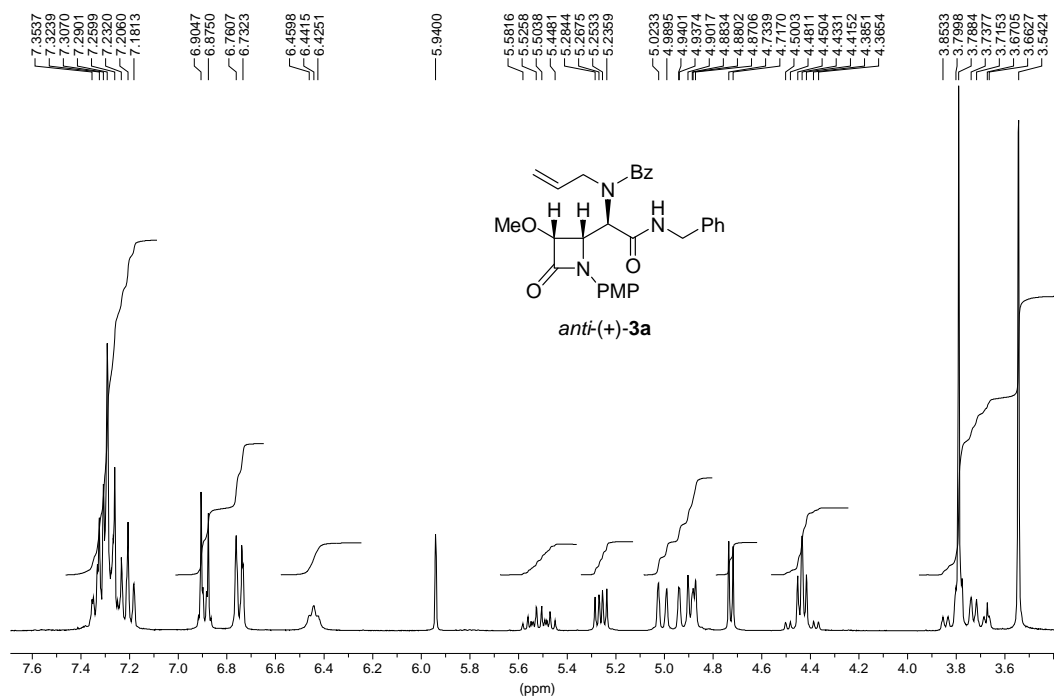

75 MHz (C<sub>2</sub>D<sub>2</sub>Cl<sub>4</sub>, 100°C)

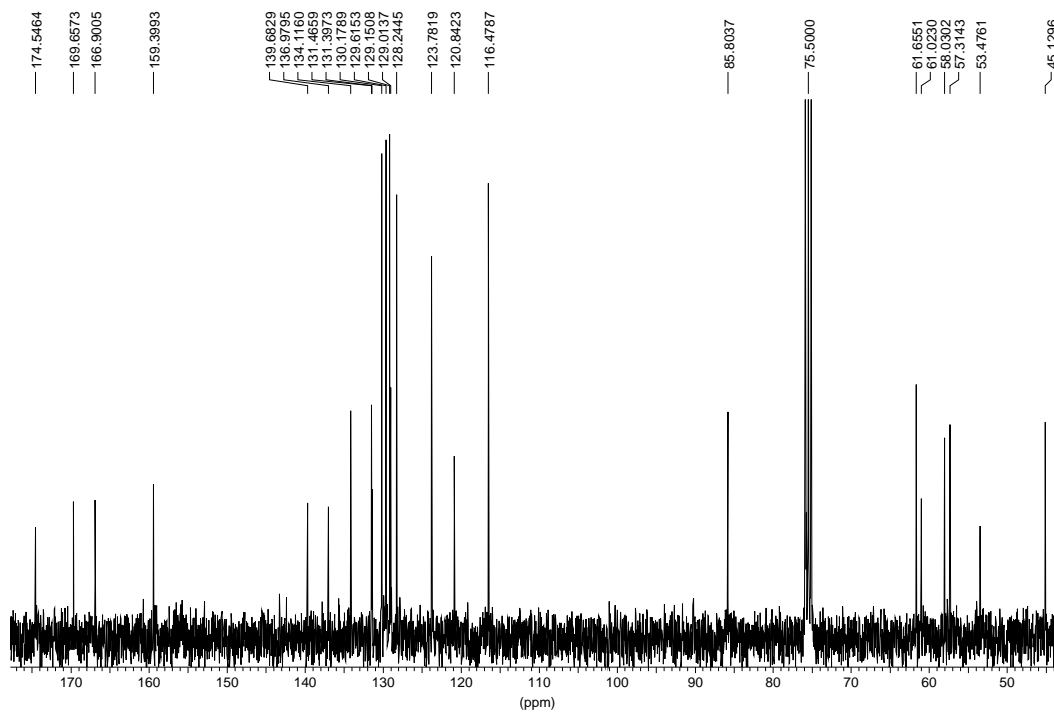





300 MHz (C<sub>2</sub>D<sub>2</sub>Cl<sub>4</sub>, 25°C)

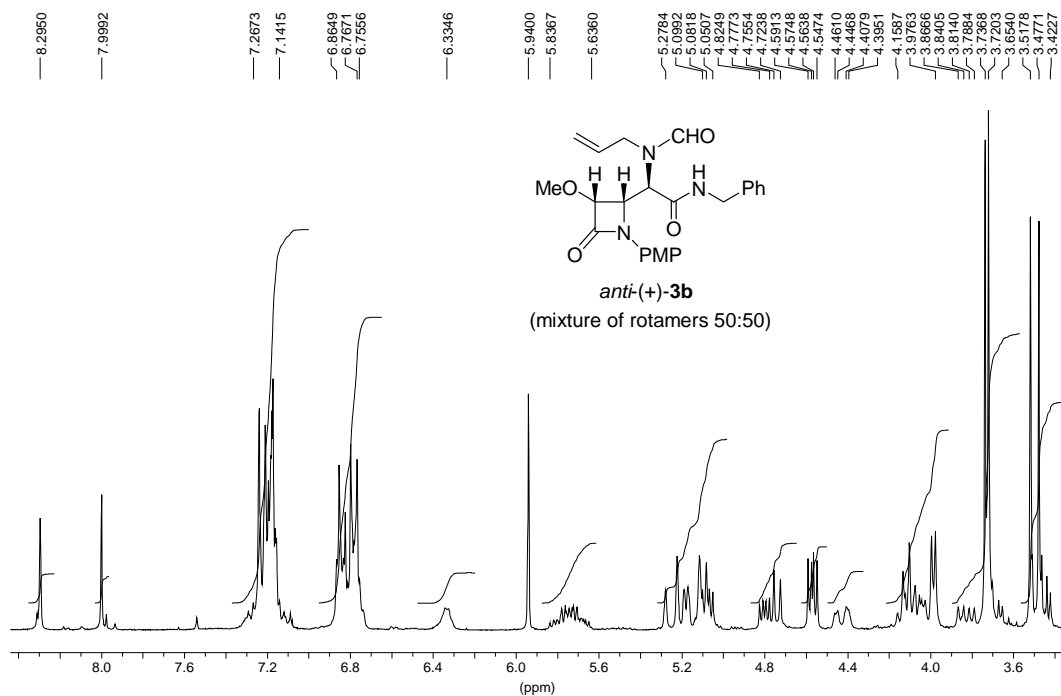

75 MHz (CDCl<sub>3</sub>, 25°C)

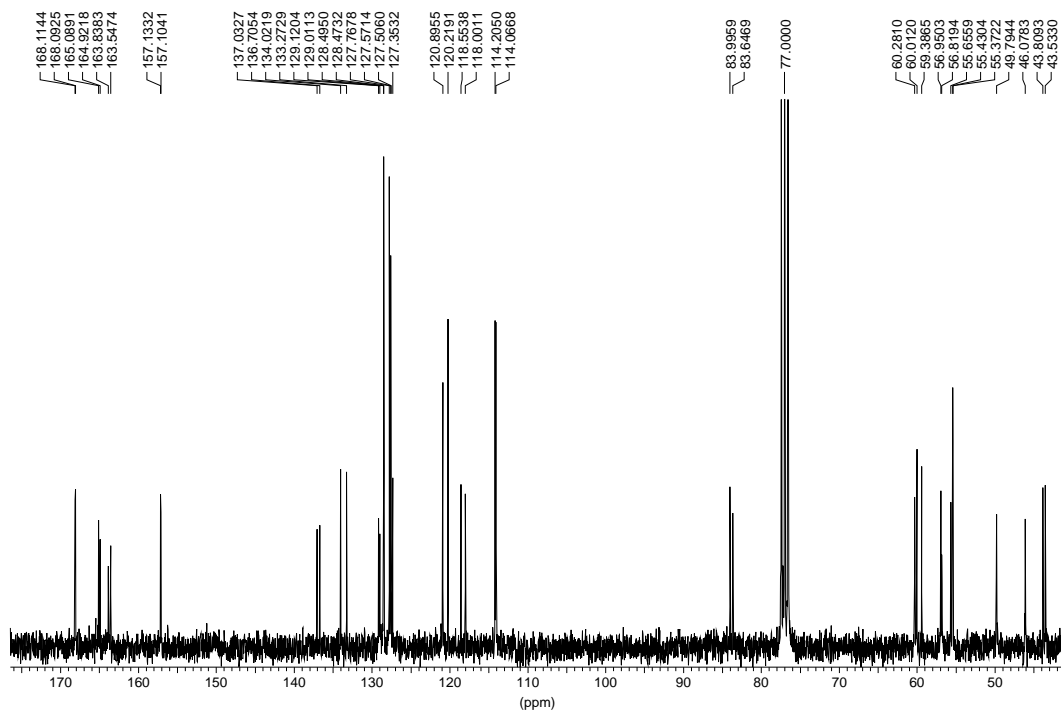

300 MHz (CDCl<sub>3</sub>, 25°C)

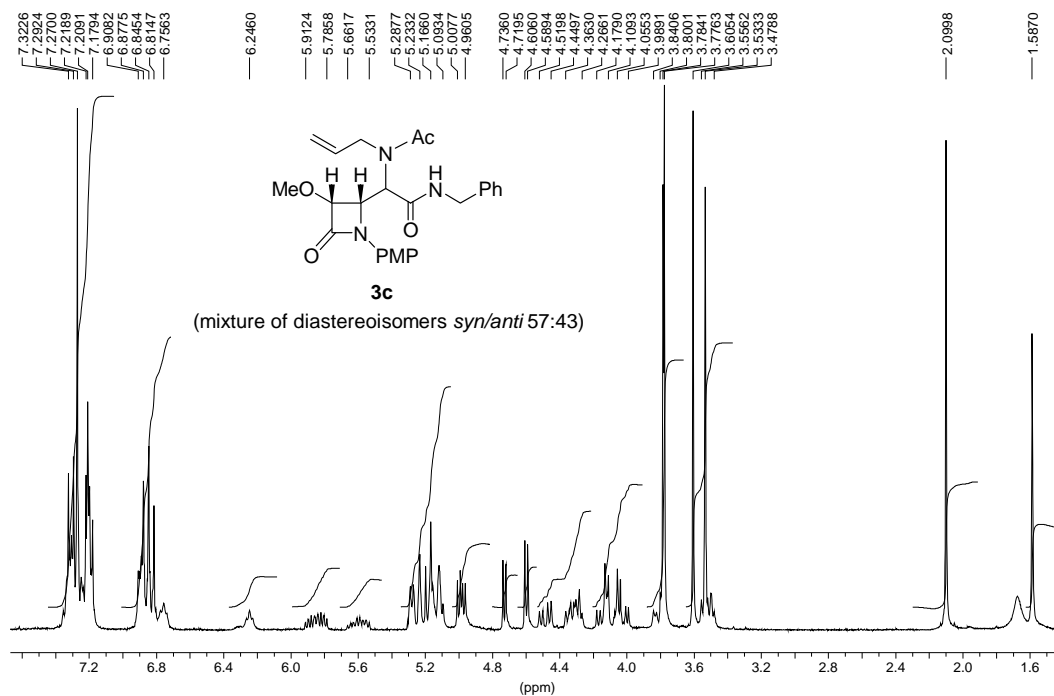

75 MHz (CDCl<sub>3</sub>, 25°C)

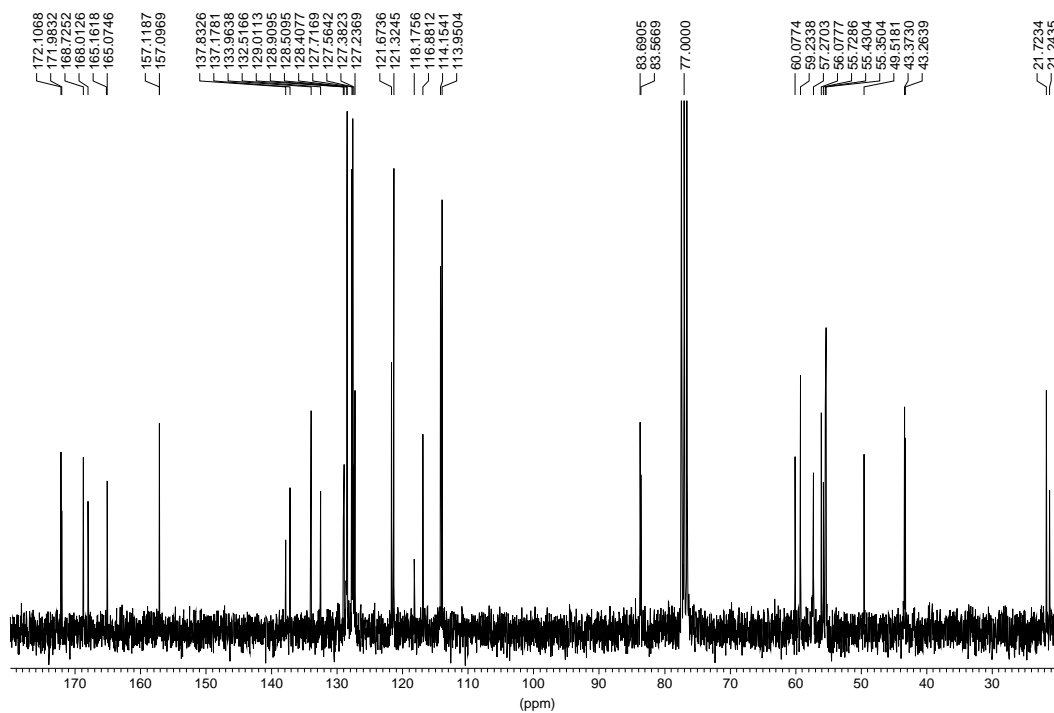

300 MHz (CDCl<sub>3</sub>, 25°C)

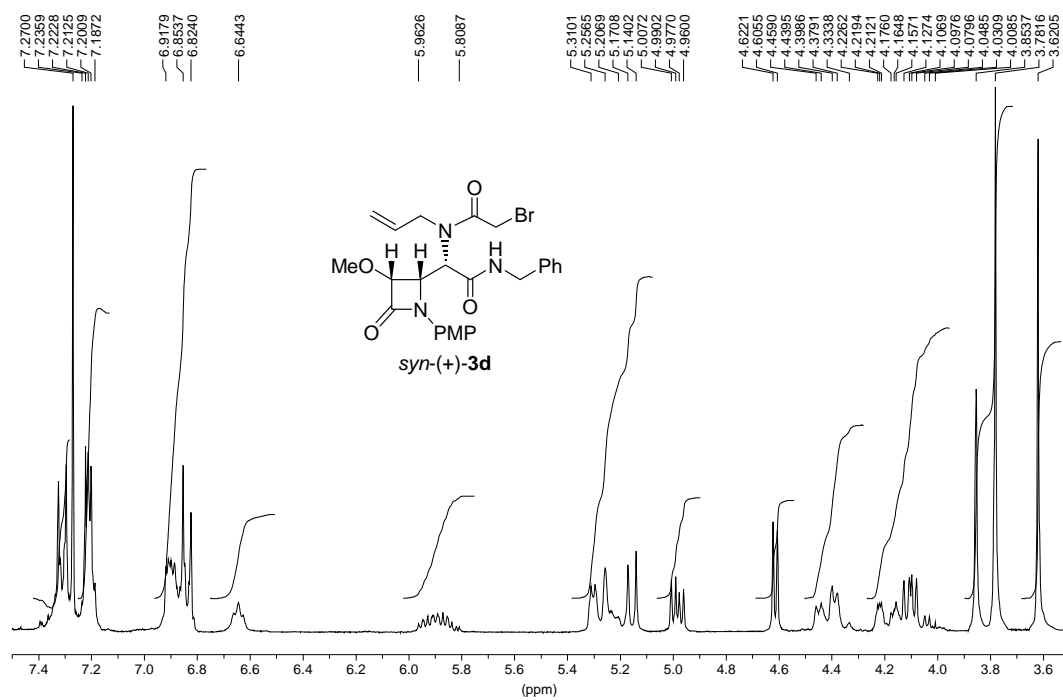

75 MHz (CDCl<sub>3</sub>, 25°C)

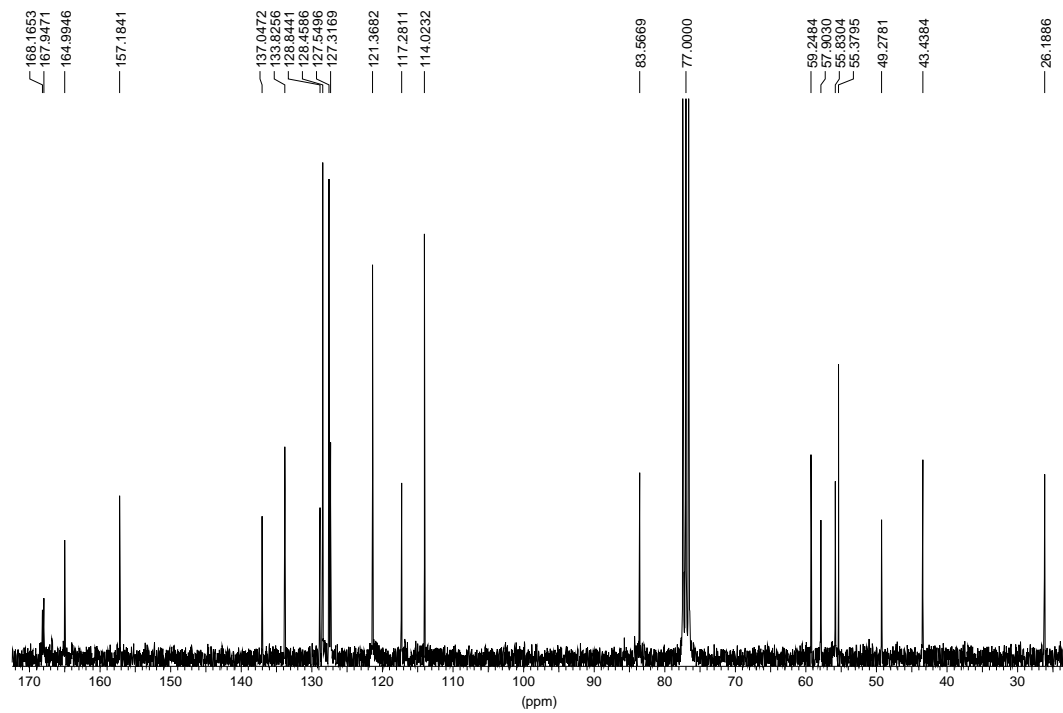

300 MHz (CDCl<sub>3</sub>, 25°C)

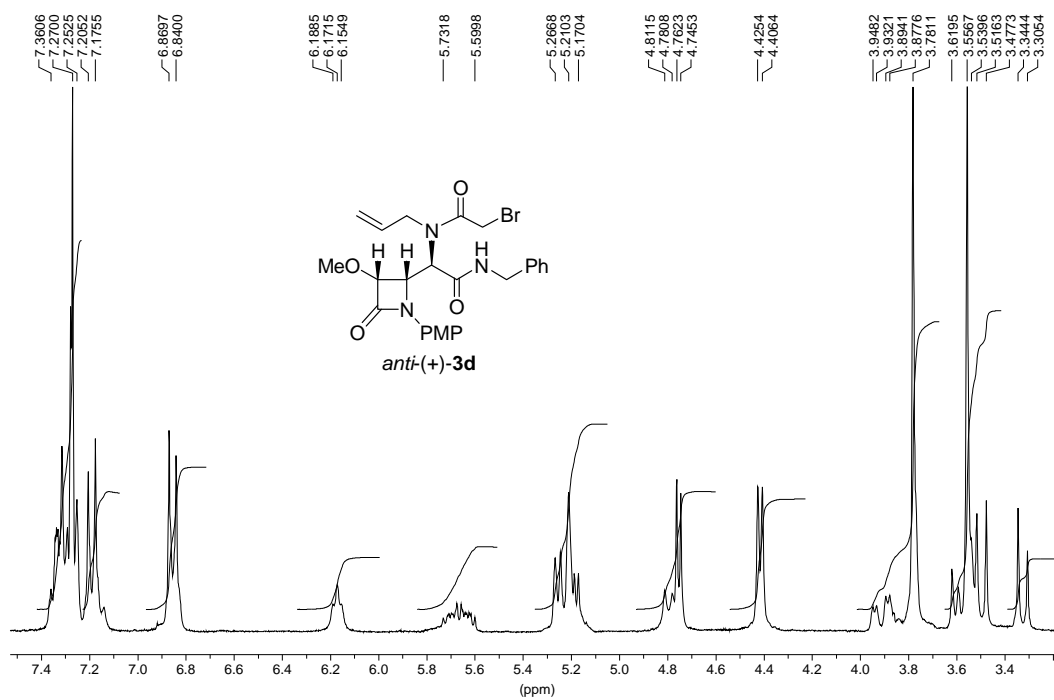

75 MHz (CDCl<sub>3</sub>, 25°C)

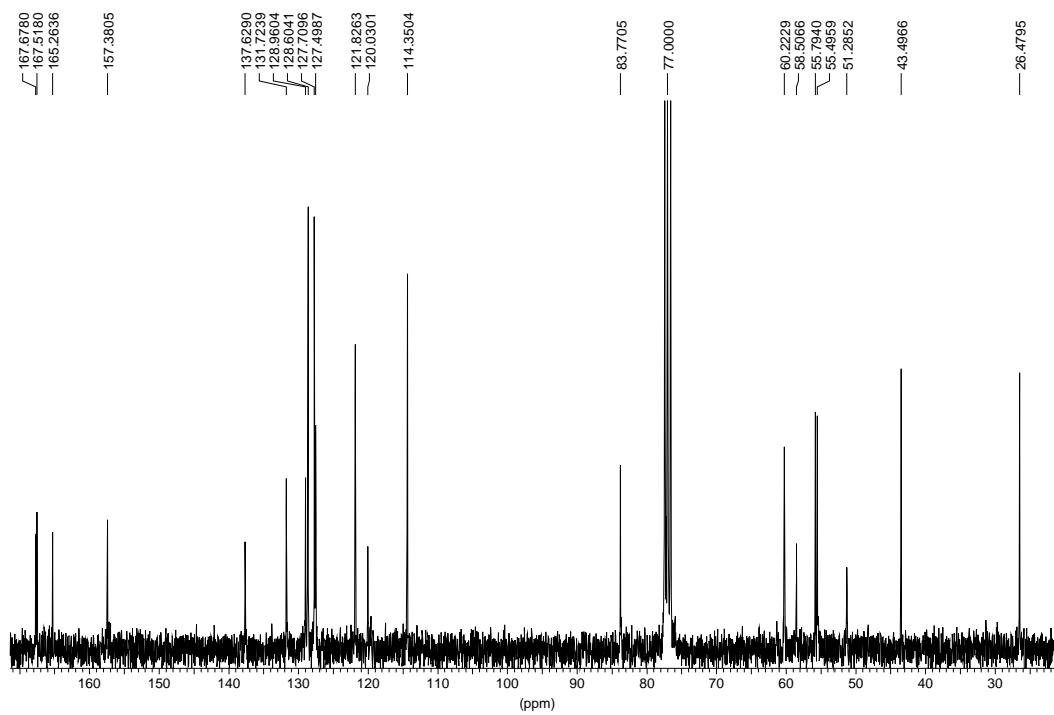

300 MHz (CDCl<sub>3</sub>, 25°C)

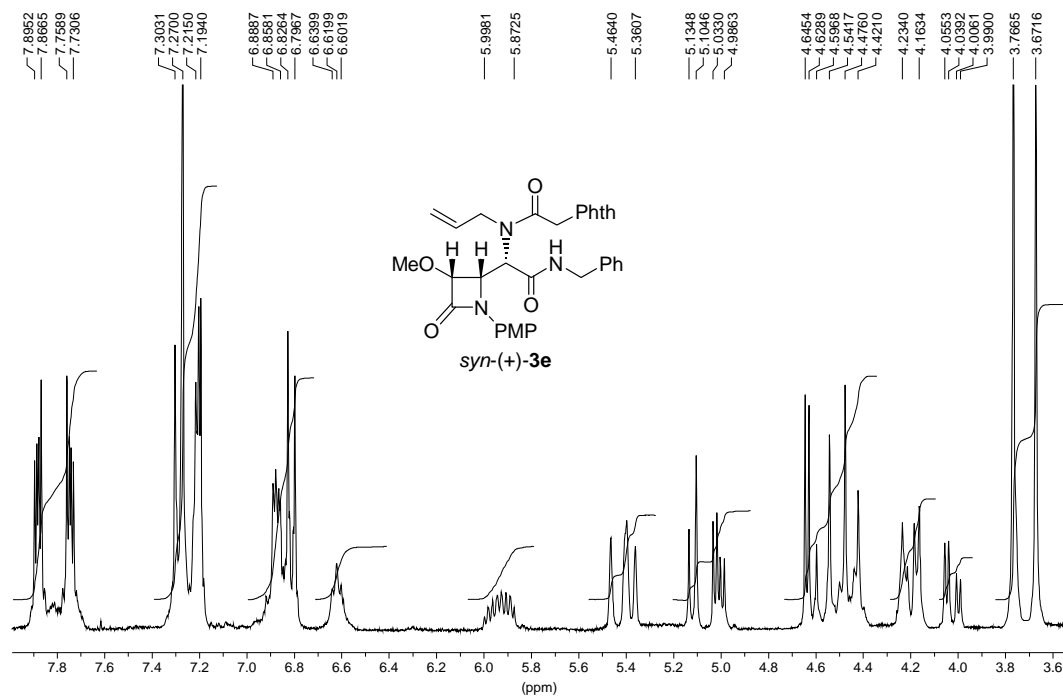

75 MHz (CDCl<sub>3</sub>, 25°C)

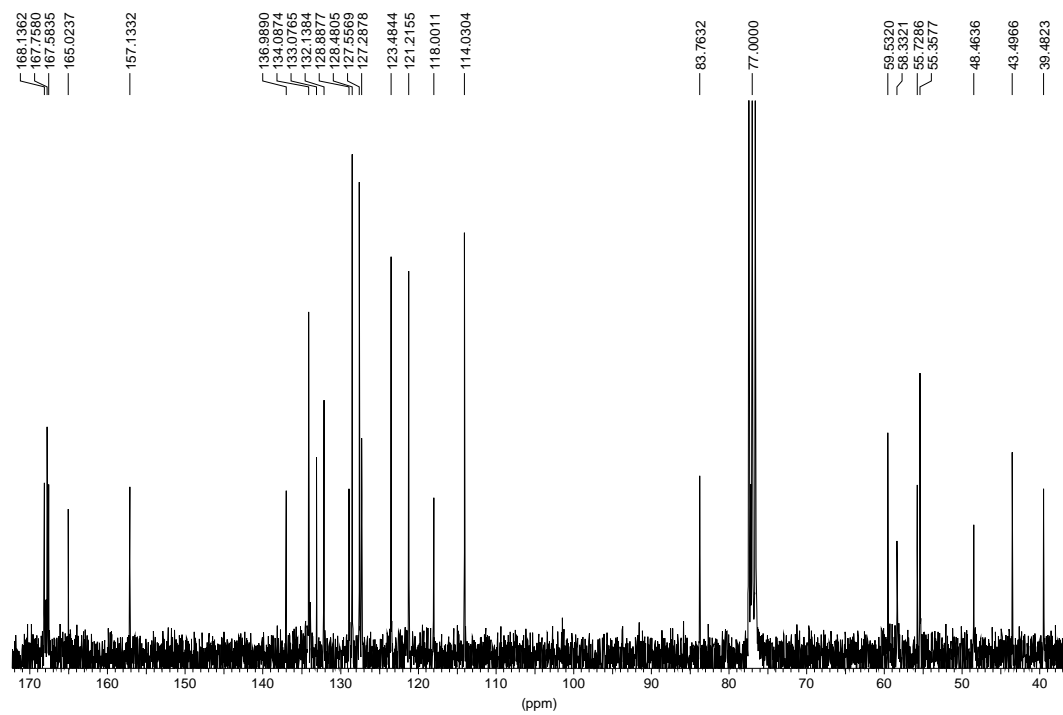

300 MHz (CDCl<sub>3</sub>, 25°C)

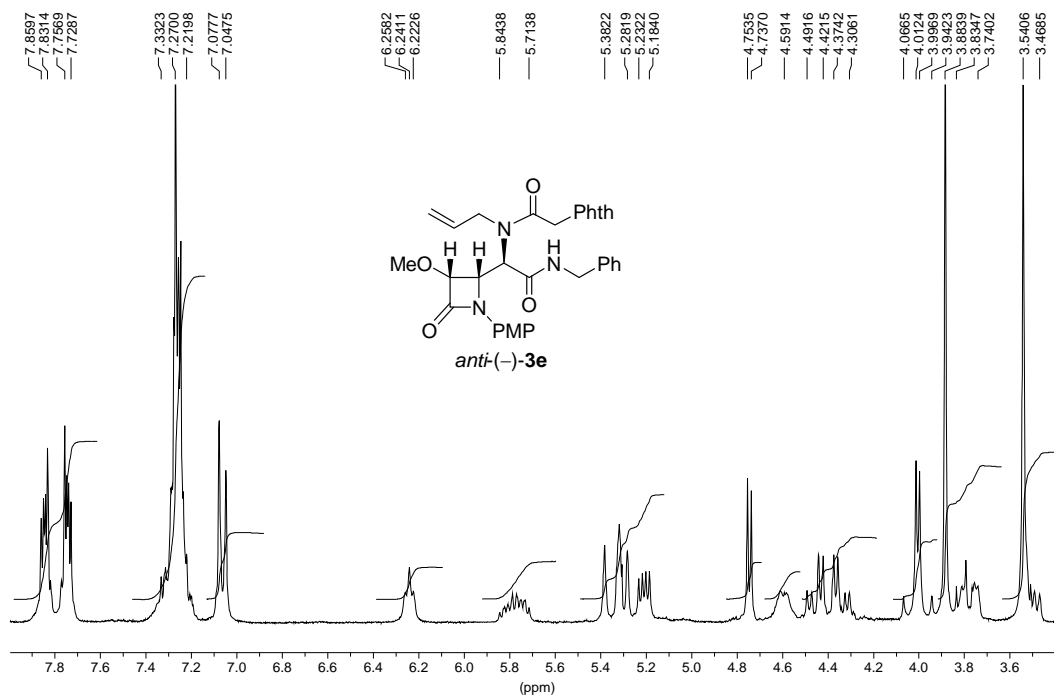

75 MHz (CDCl<sub>3</sub>, 25°C)

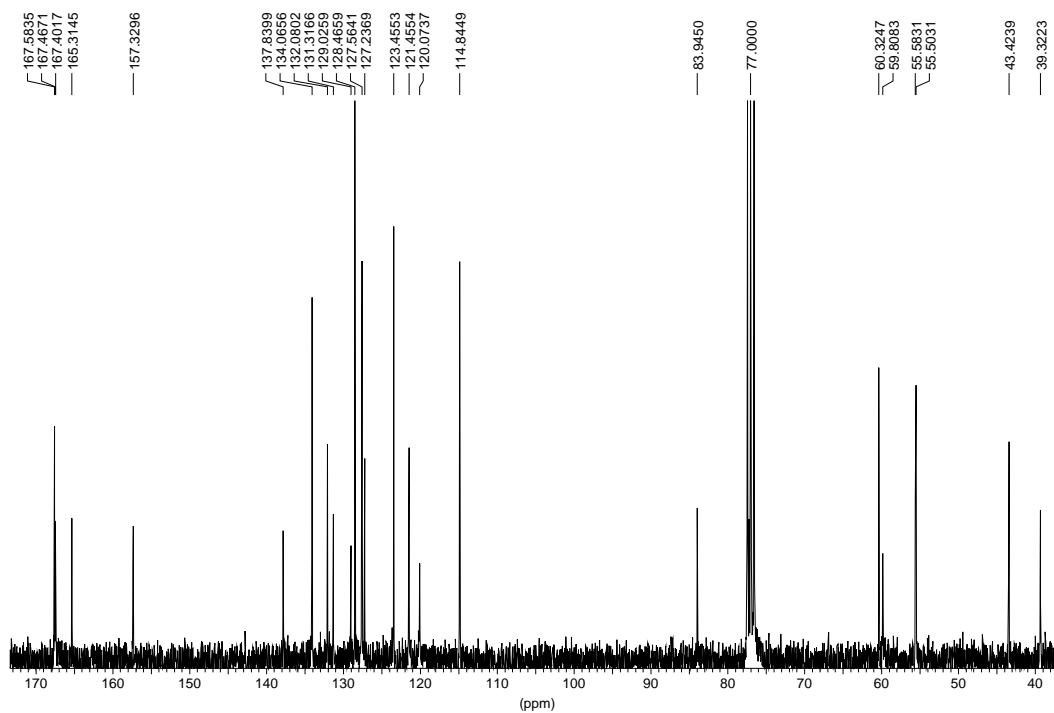

300 MHz (CDCl<sub>3</sub>, 25°C)

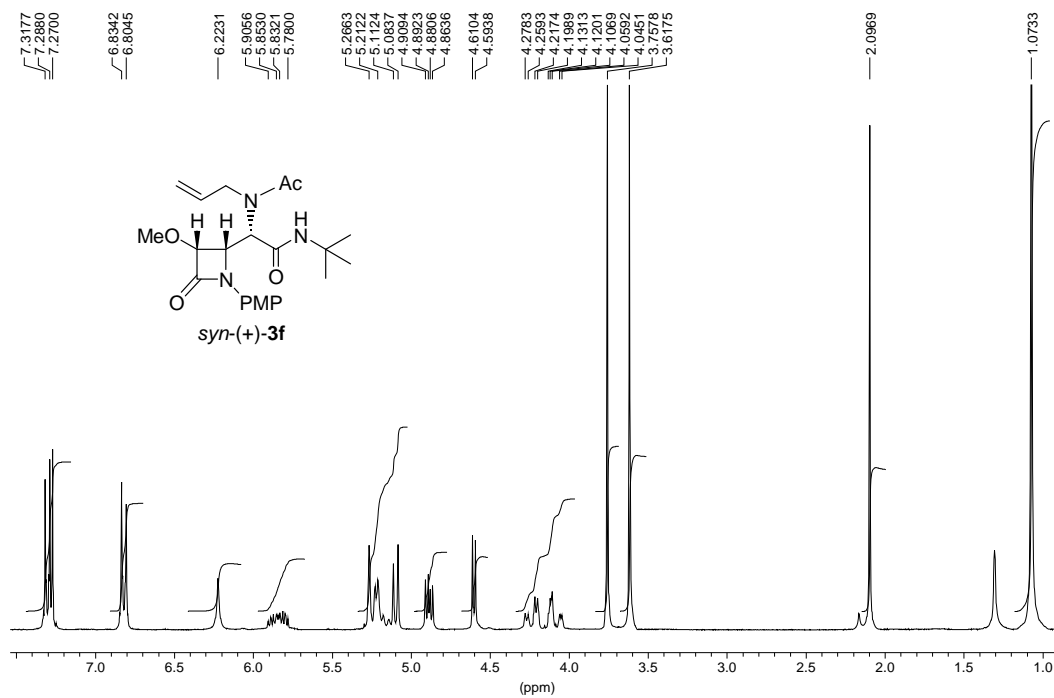

75 MHz (CDCl<sub>3</sub>, 25°C)

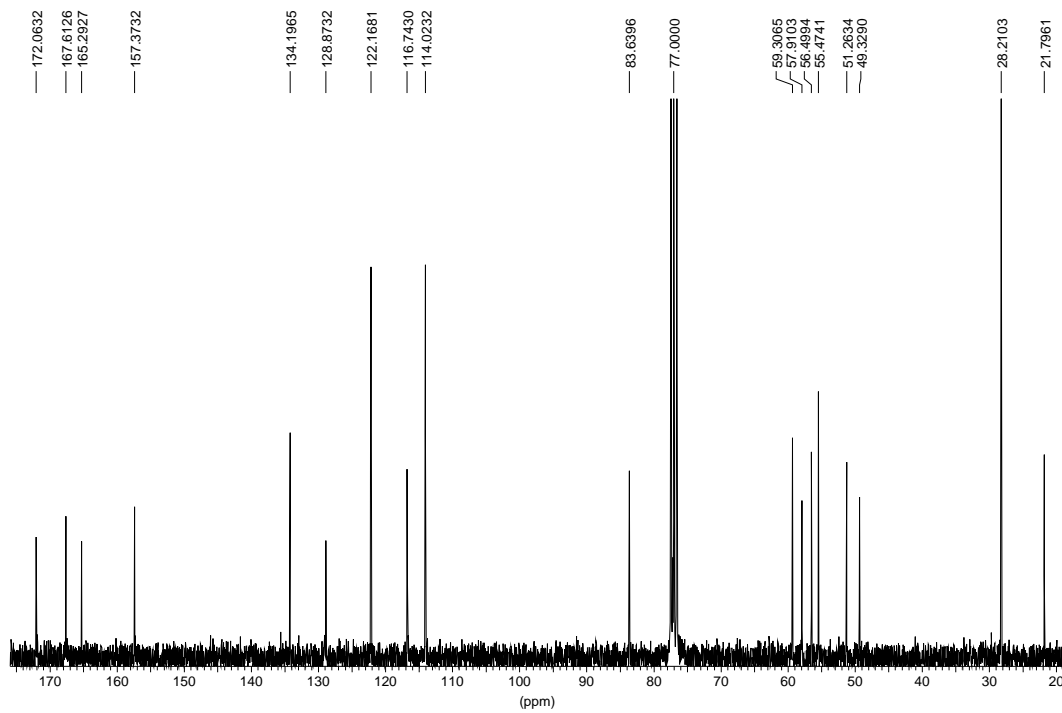

300 MHz (CDCl<sub>3</sub>, 25°C)

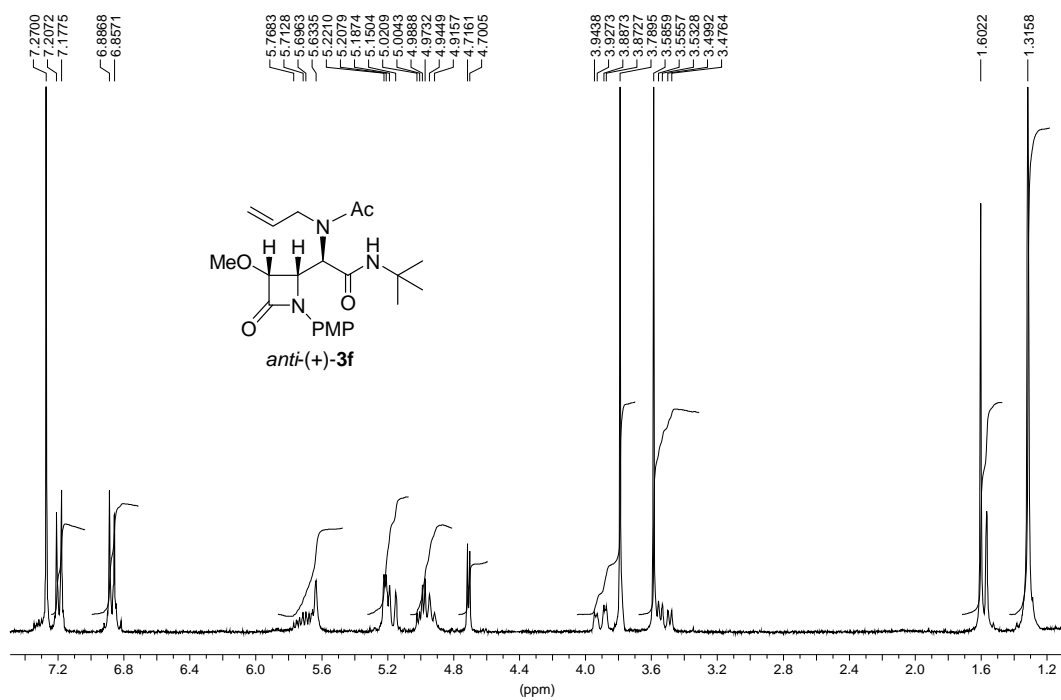

75 MHz (CDCl<sub>3</sub>, 25°C)

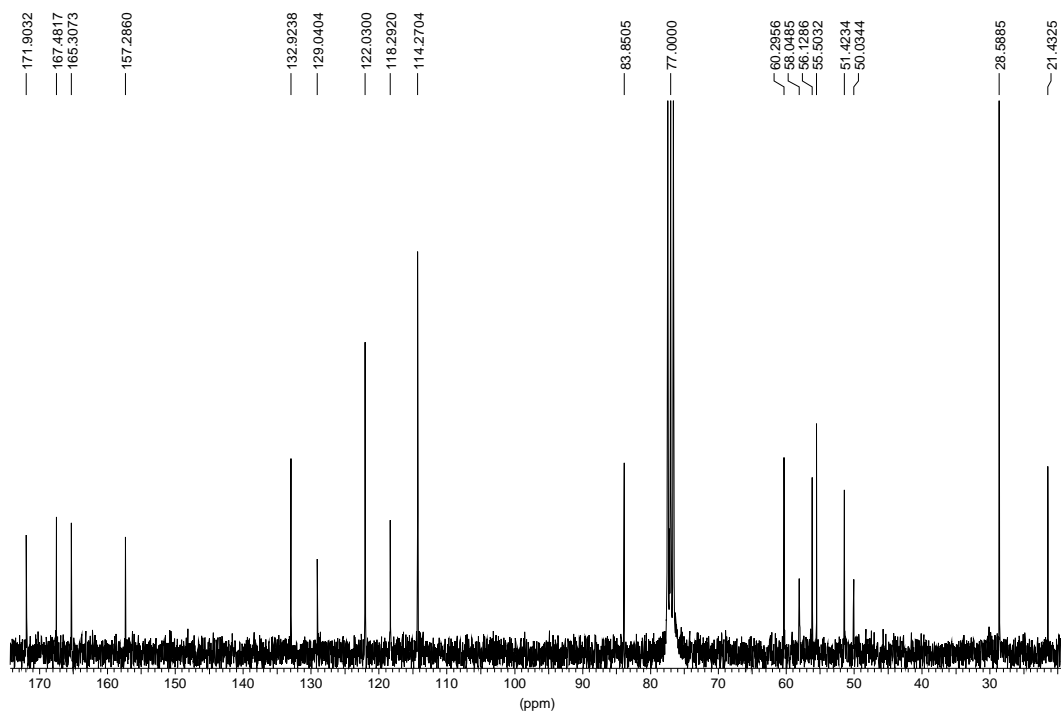



300 MHz (CDCl<sub>3</sub>, 25°C)

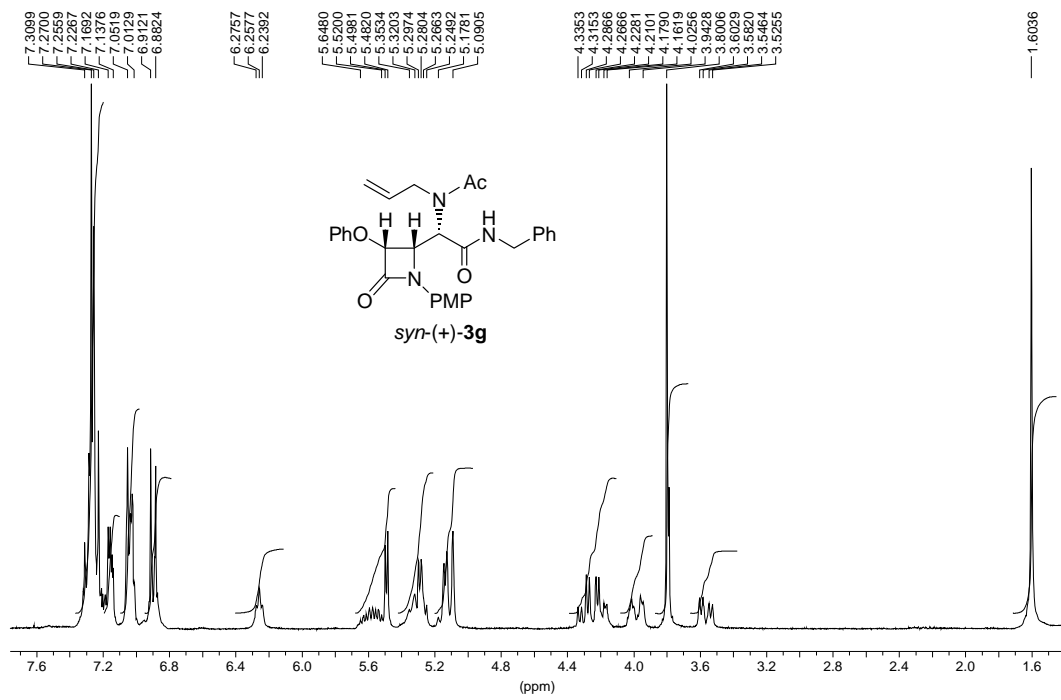

75 MHz (CDCl<sub>3</sub>, 25°C)

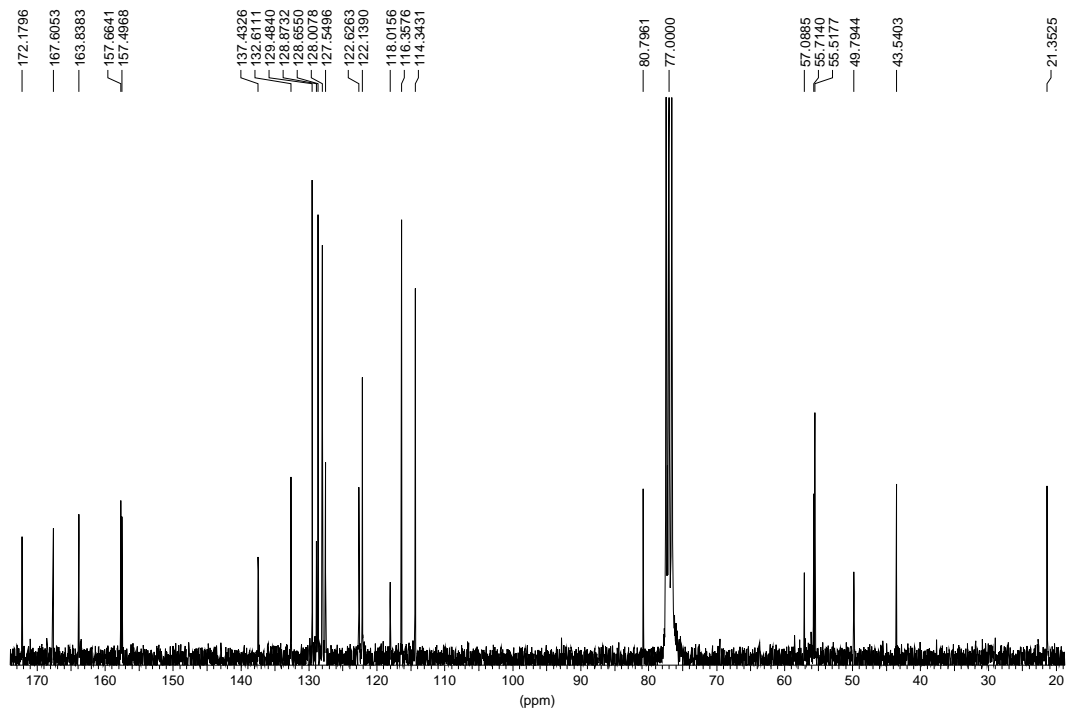

300 MHz (CDCl<sub>3</sub>, 25°C)

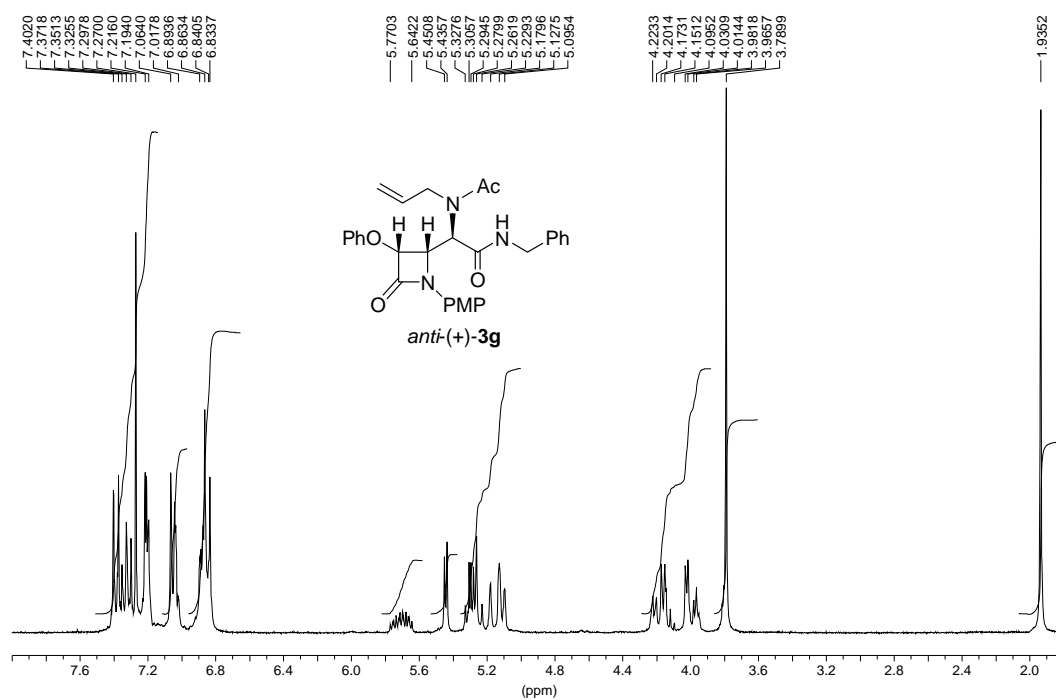

75 MHz (CDCl<sub>3</sub>, 25°C)

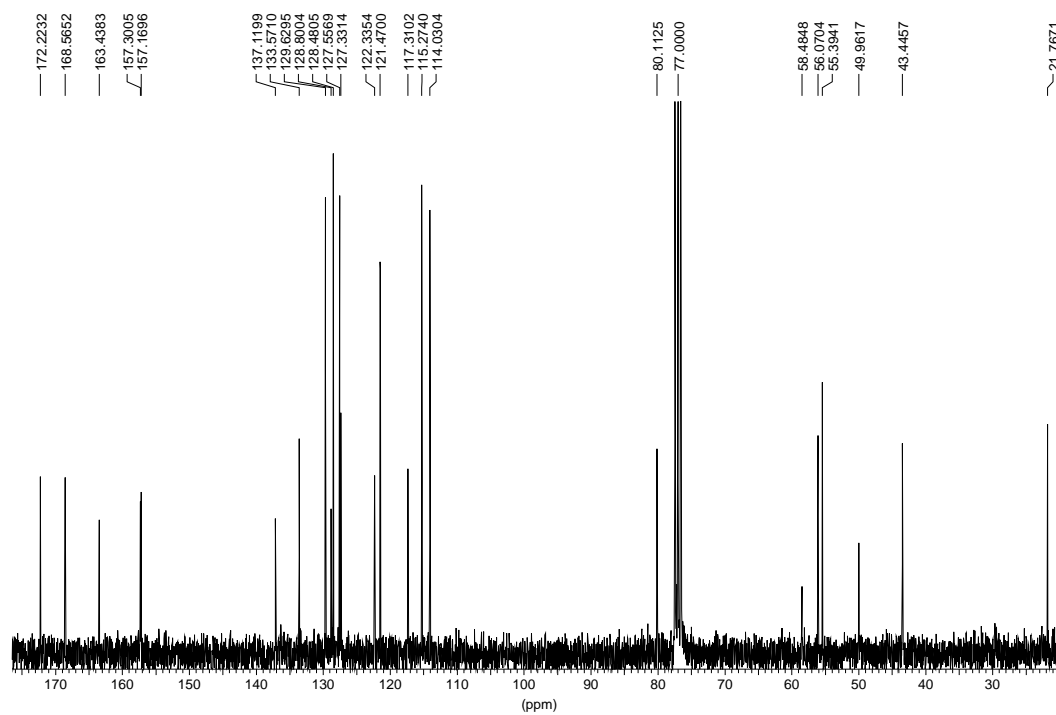

300 MHz (CDCl<sub>3</sub>, 25°C)

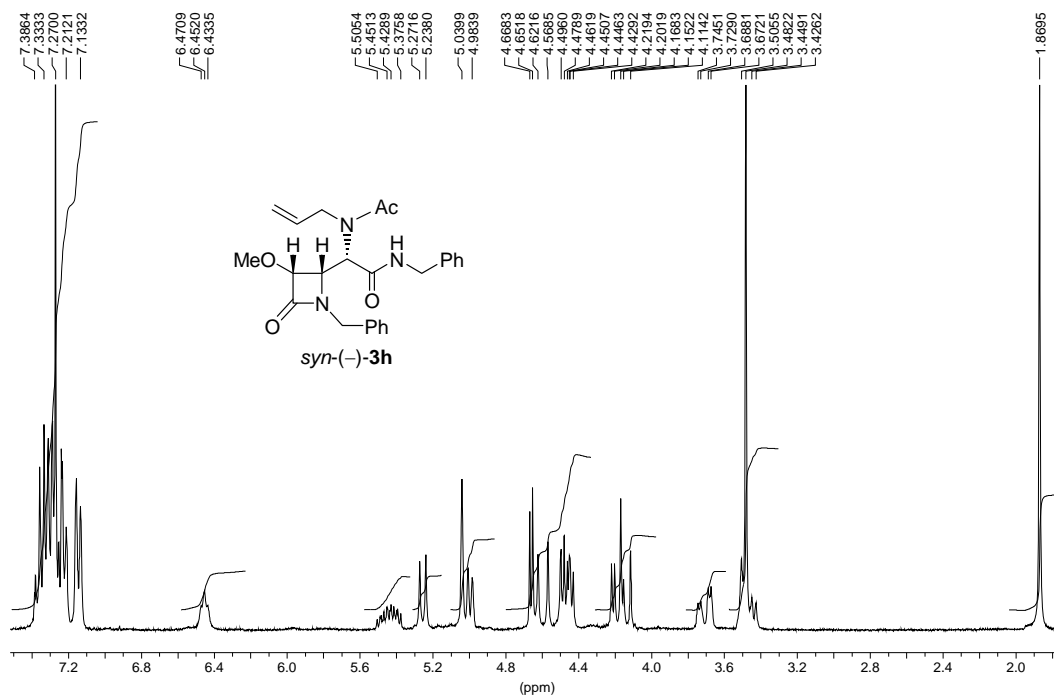

75 MHz (CDCl<sub>3</sub>, 25°C)

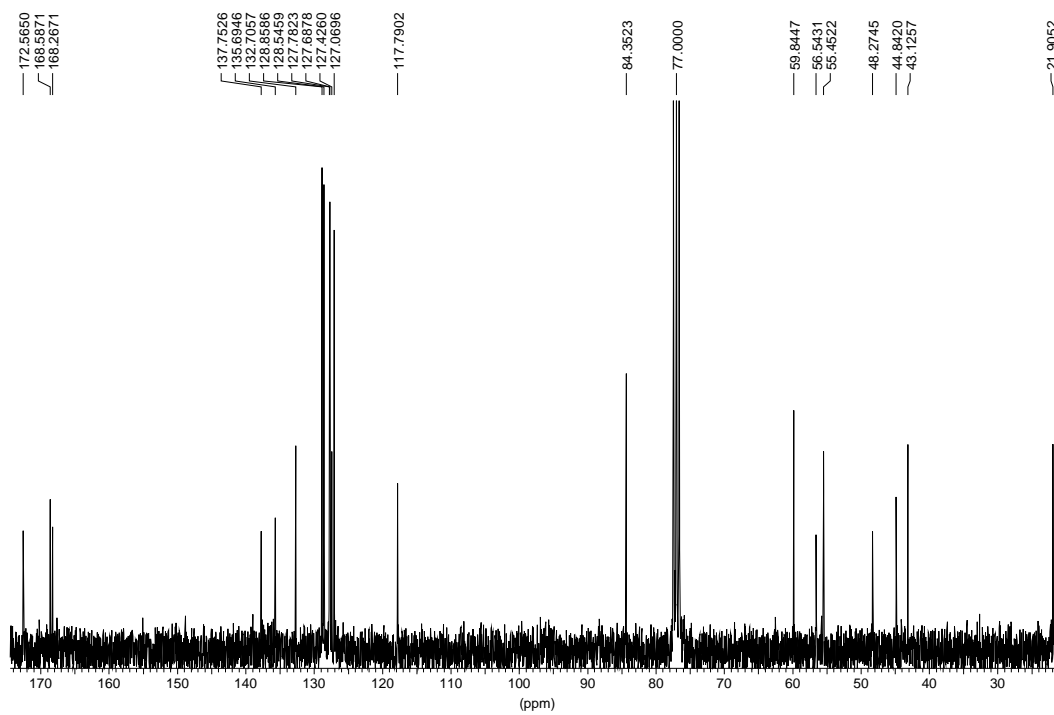

300 MHz (CDCl<sub>3</sub>, 25°C)

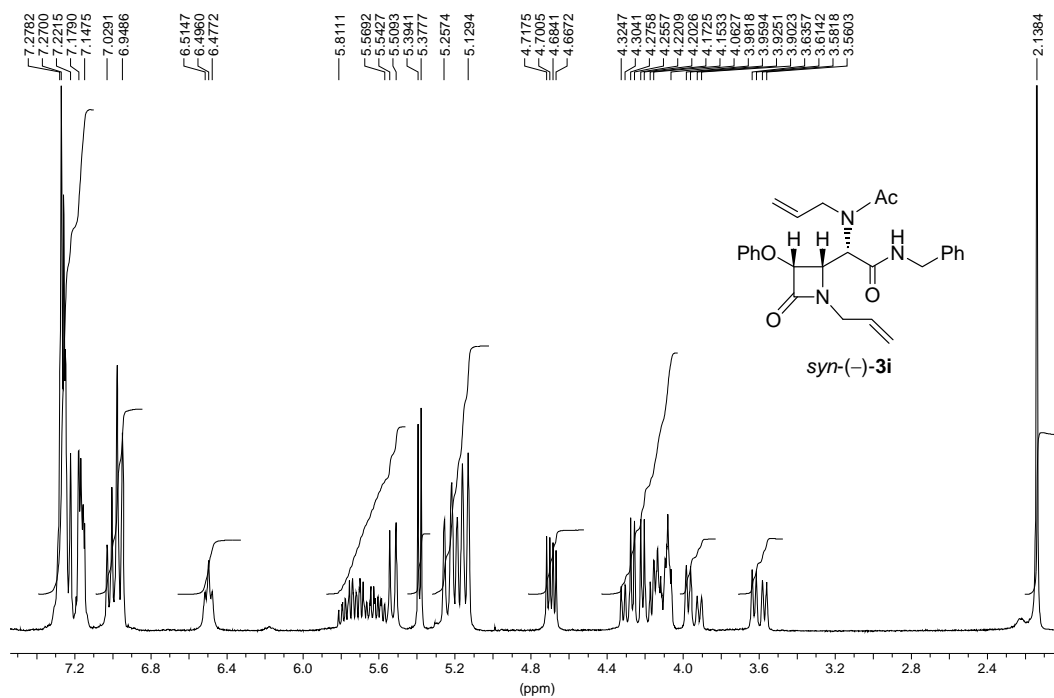

75 MHz (CDCl<sub>3</sub>, 25°C)

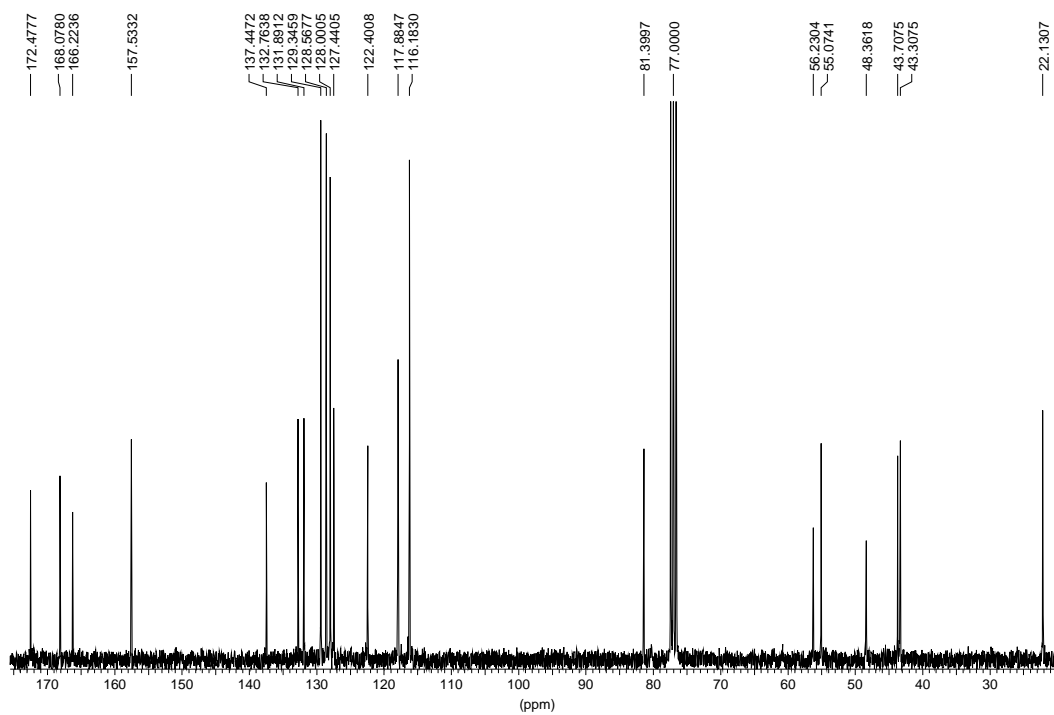

300 MHz (CDCl<sub>3</sub>, 25°C)

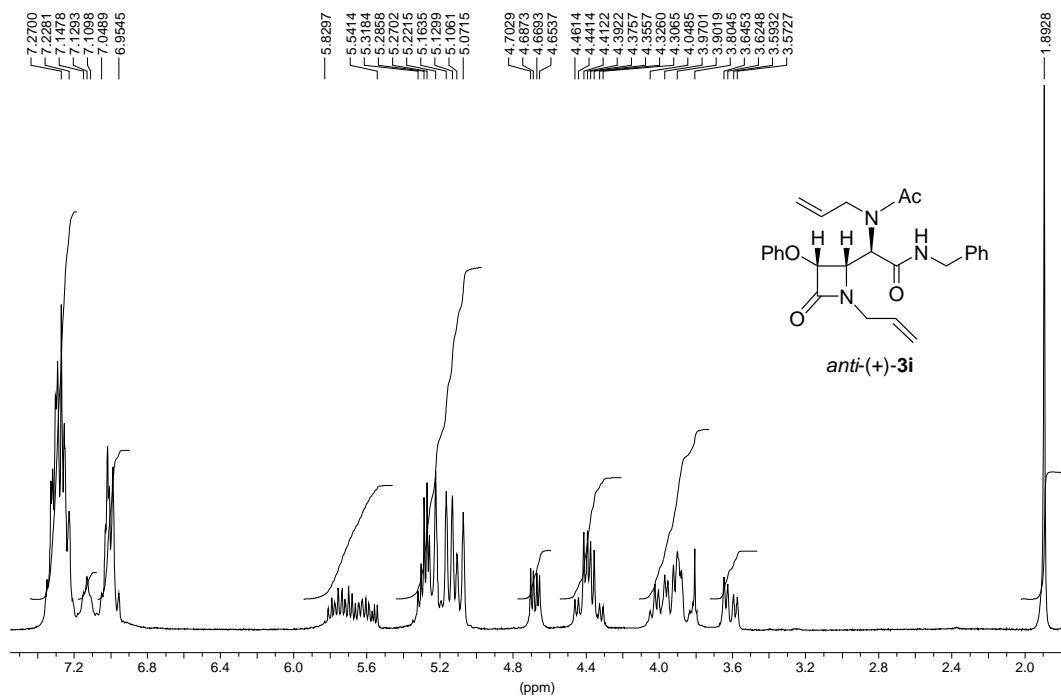

75 MHz (CDCl<sub>3</sub>, 25°C)

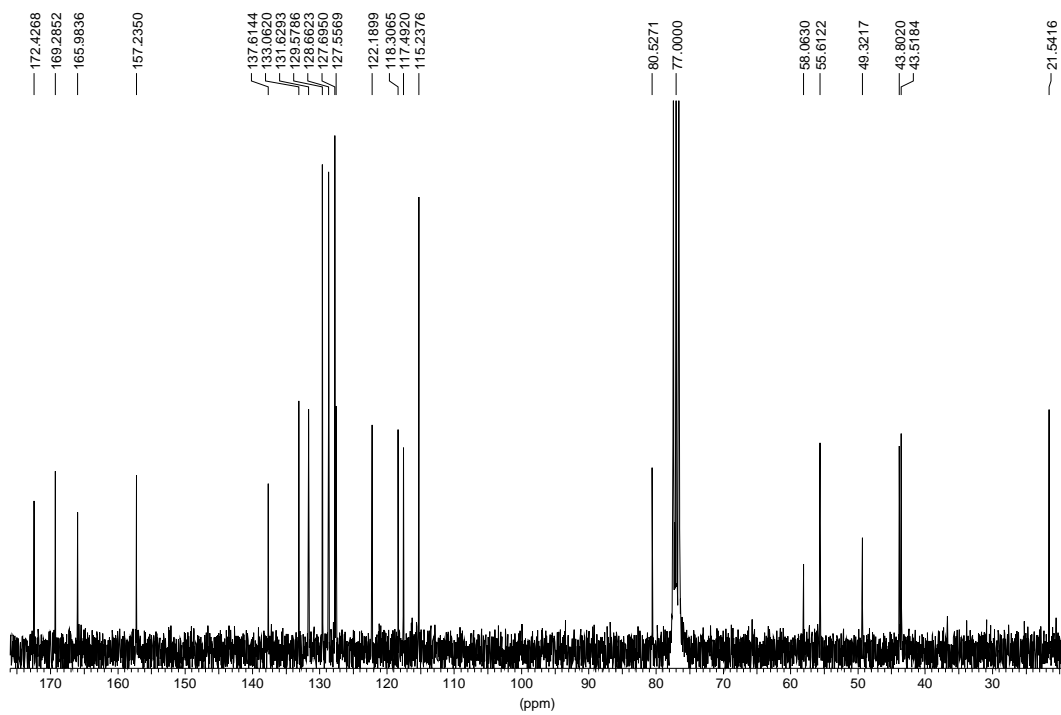

300 MHz (CDCl<sub>3</sub>, 25°C)

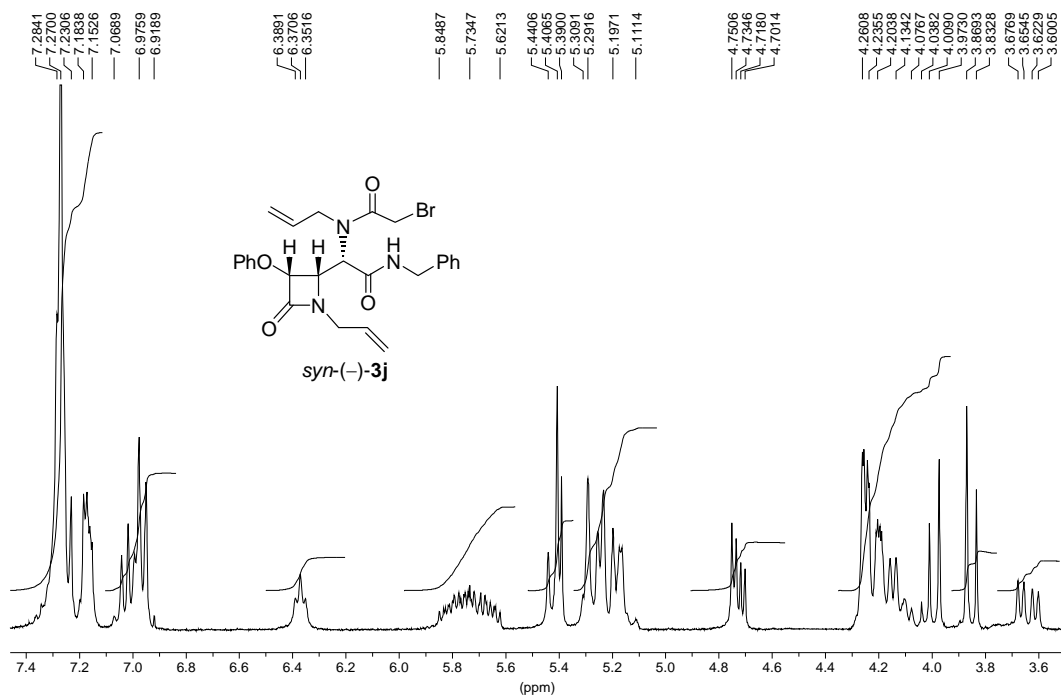

75 MHz (CDCl<sub>3</sub>, 25°C)

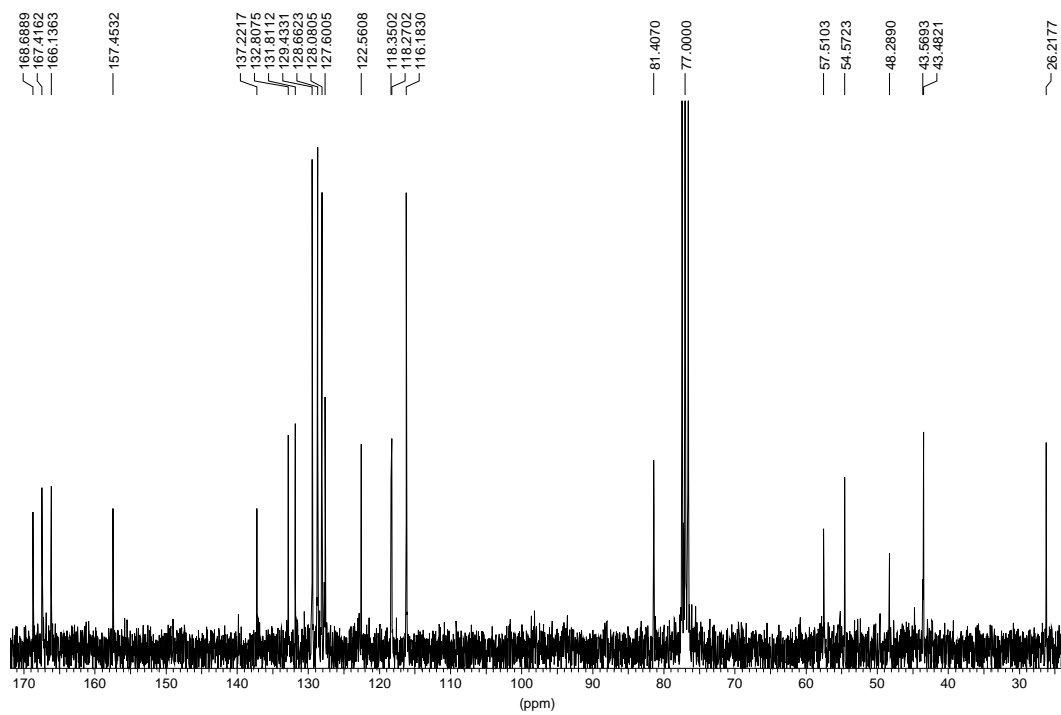

300 MHz (CDCl<sub>3</sub>, 25°C)

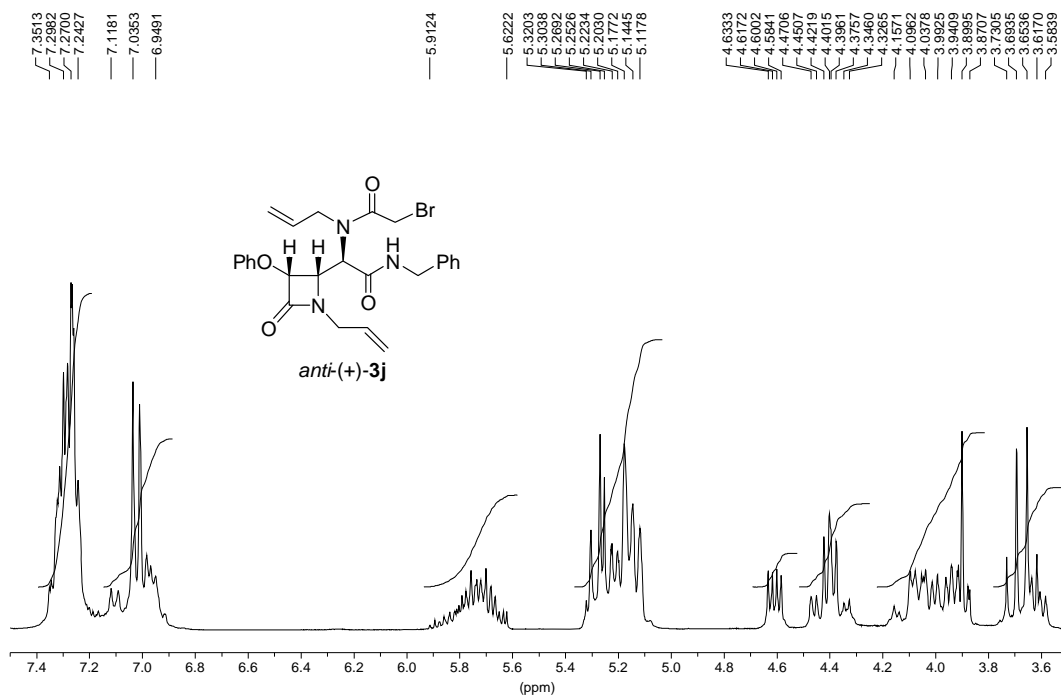

75 MHz (CDCl<sub>3</sub>, 25°C)

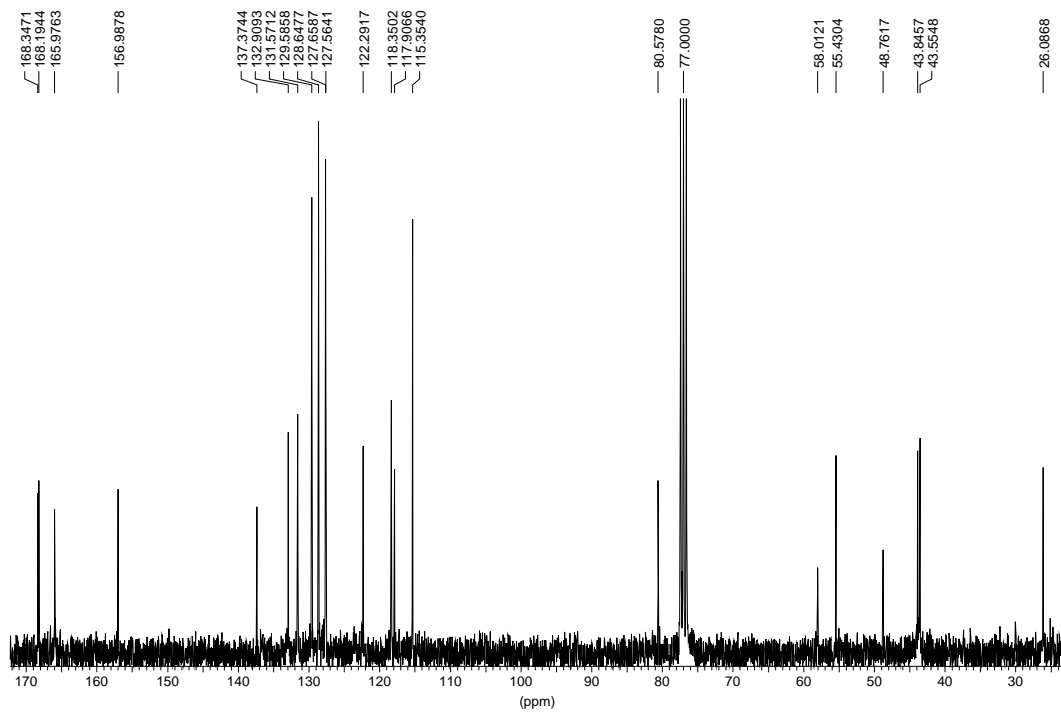

300 MHz (CDCl<sub>3</sub>, 25°C)

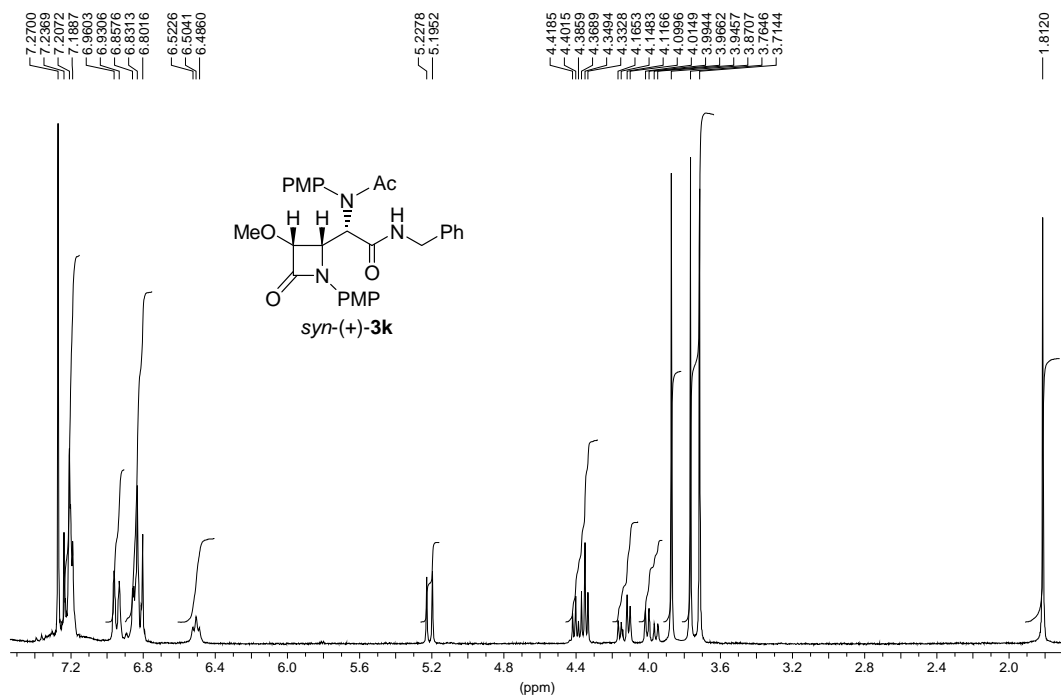

75 MHz (CDCl<sub>3</sub>, 25°C)

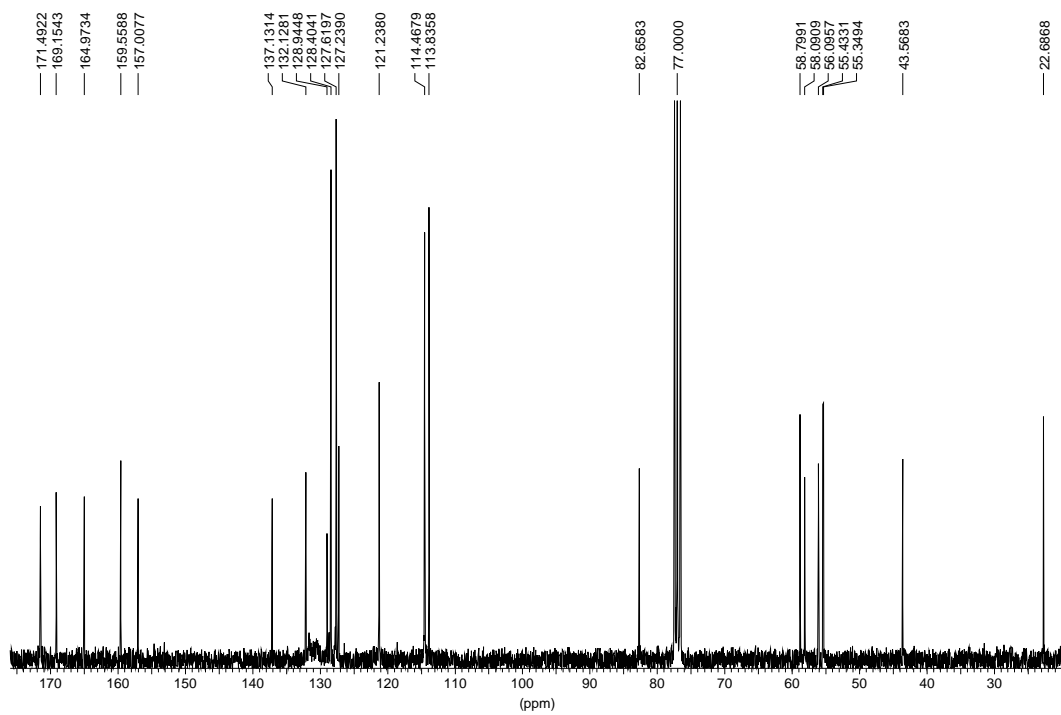



300 MHz (CDCl<sub>3</sub>, 25°C)

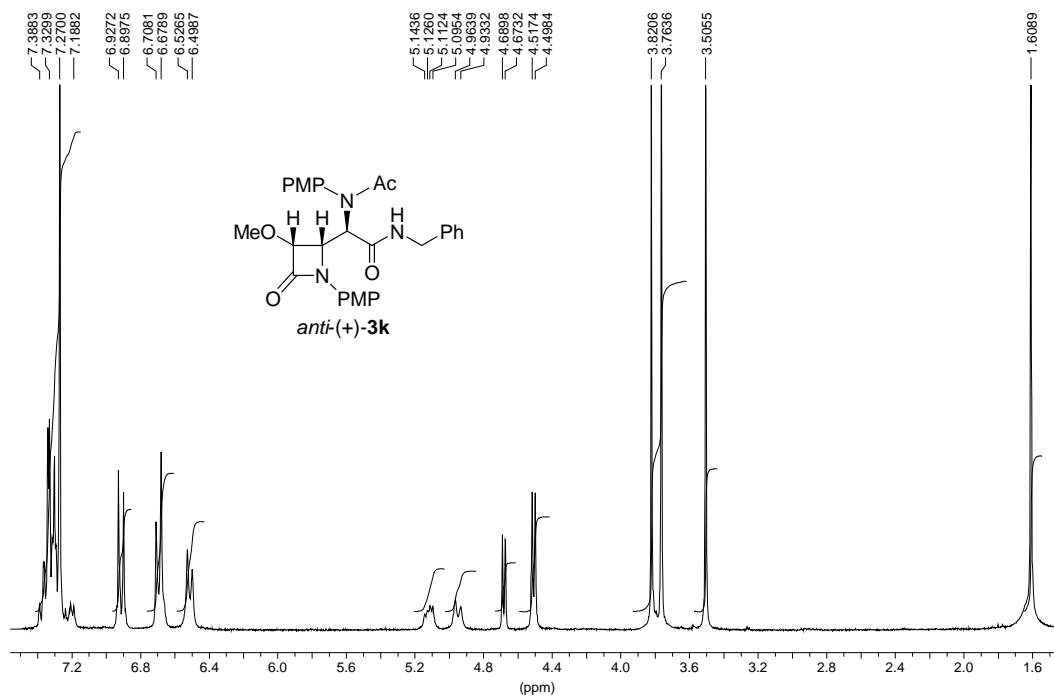

75 MHz (CDCl<sub>3</sub>, 25°C)

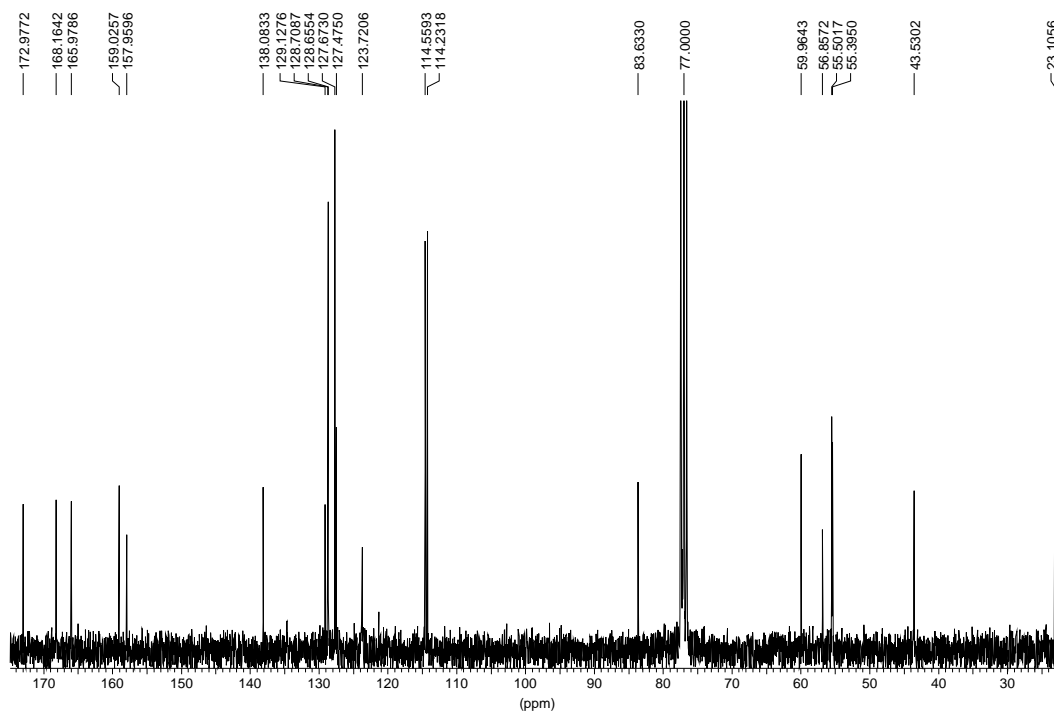

300 MHz (CDCl<sub>3</sub>, 25°C)

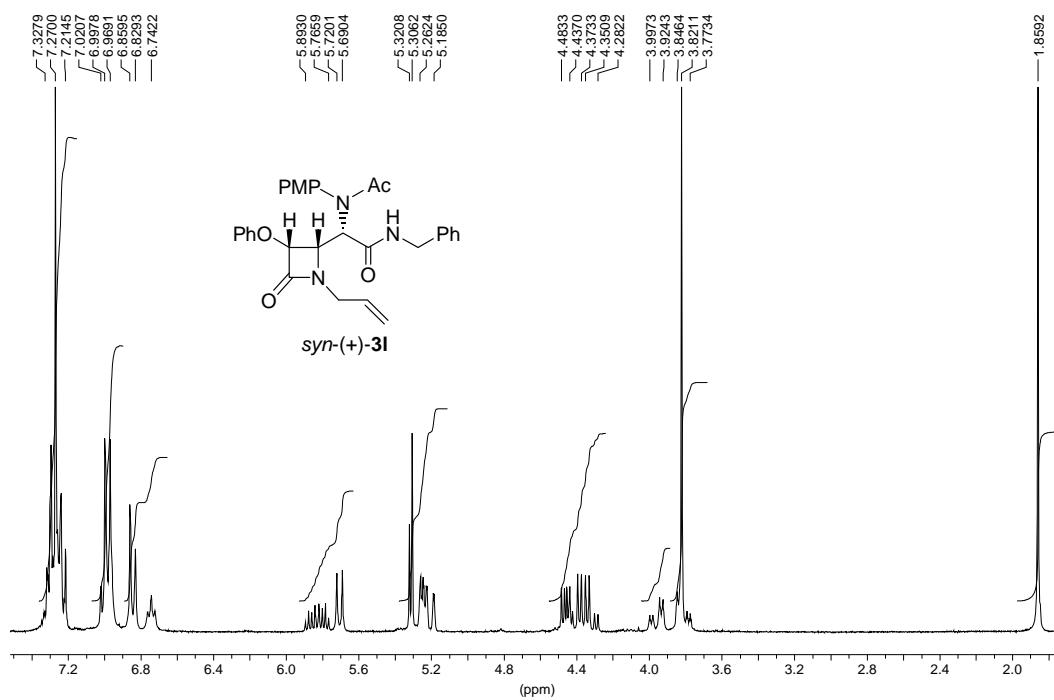

75 MHz (CDCl<sub>3</sub>, 25°C)

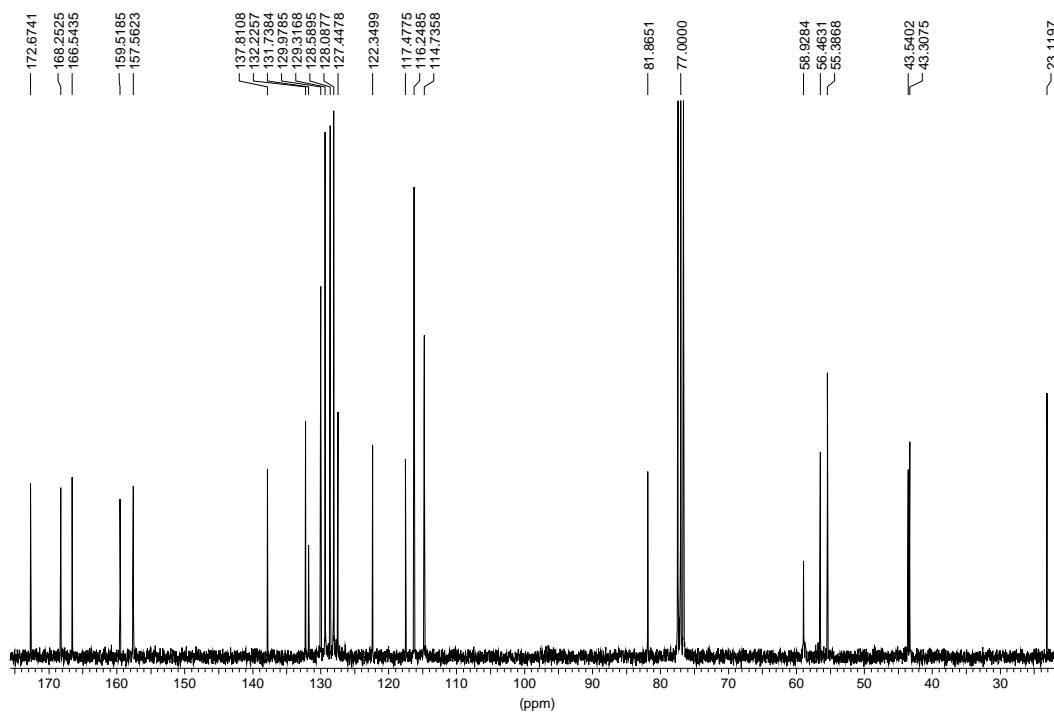

300 MHz (CDCl<sub>3</sub>, 25°C)

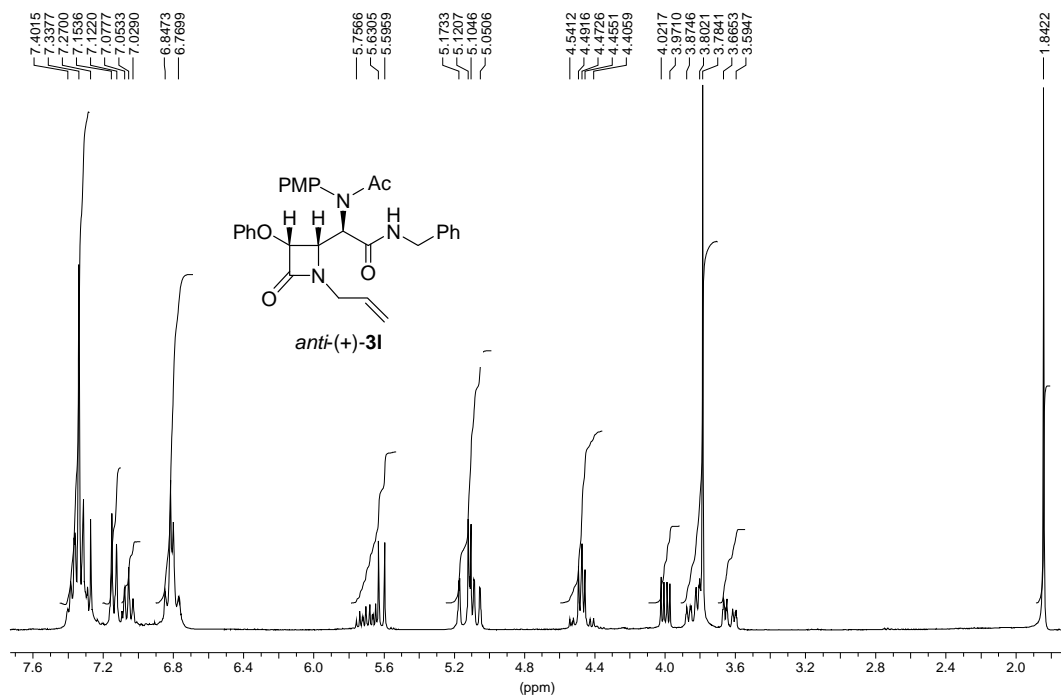

75 MHz (CDCl<sub>3</sub>, 25°C)

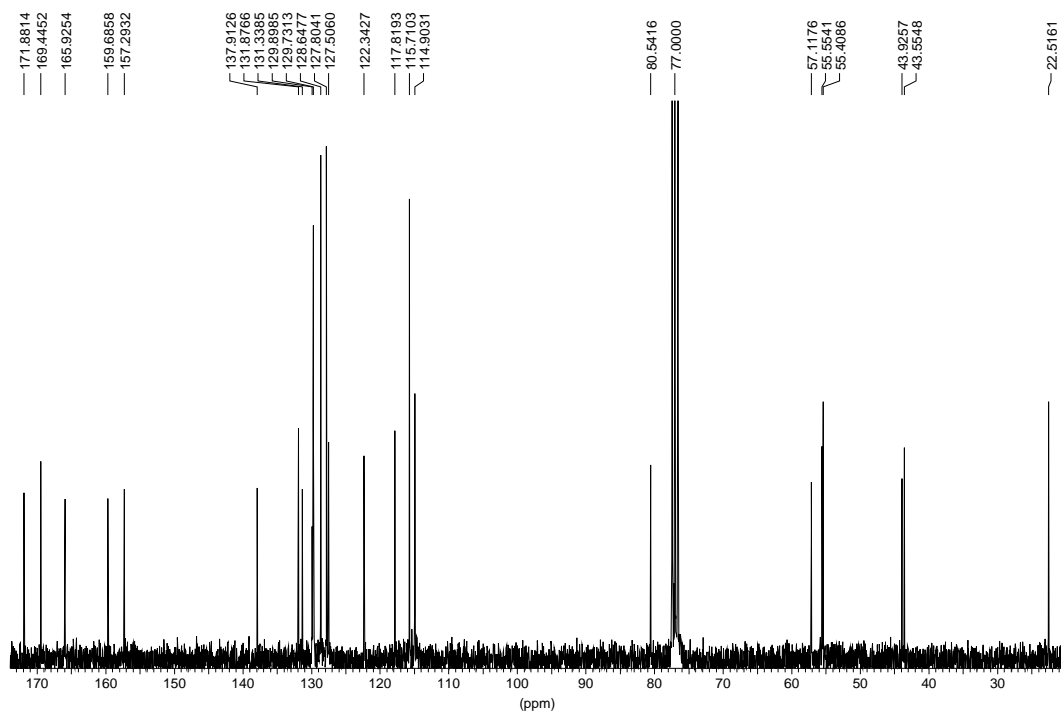

300 MHz (CDCl<sub>3</sub>, 25°C)

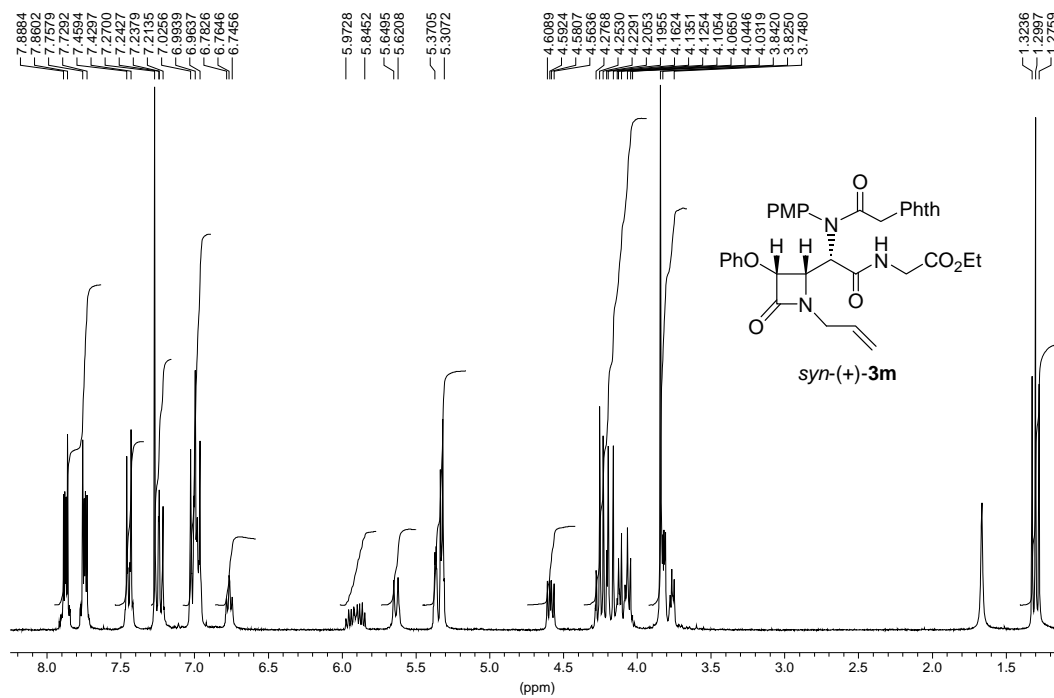

75 MHz (CDCl<sub>3</sub>, 25°C)

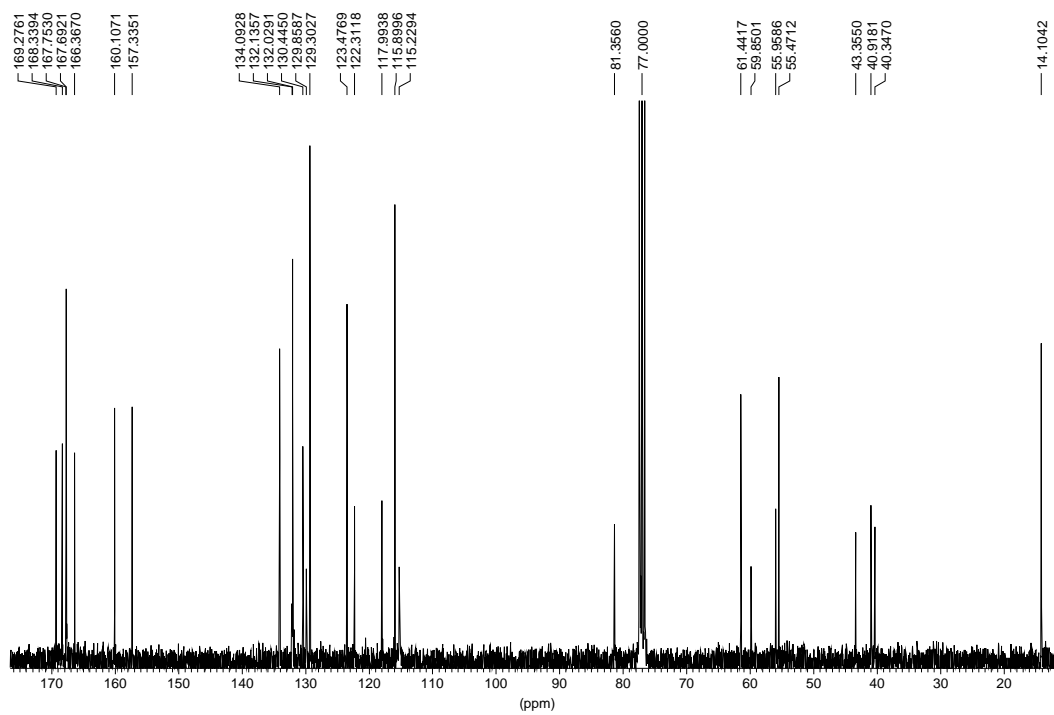



300 MHz (CDCl<sub>3</sub>, 25°C)

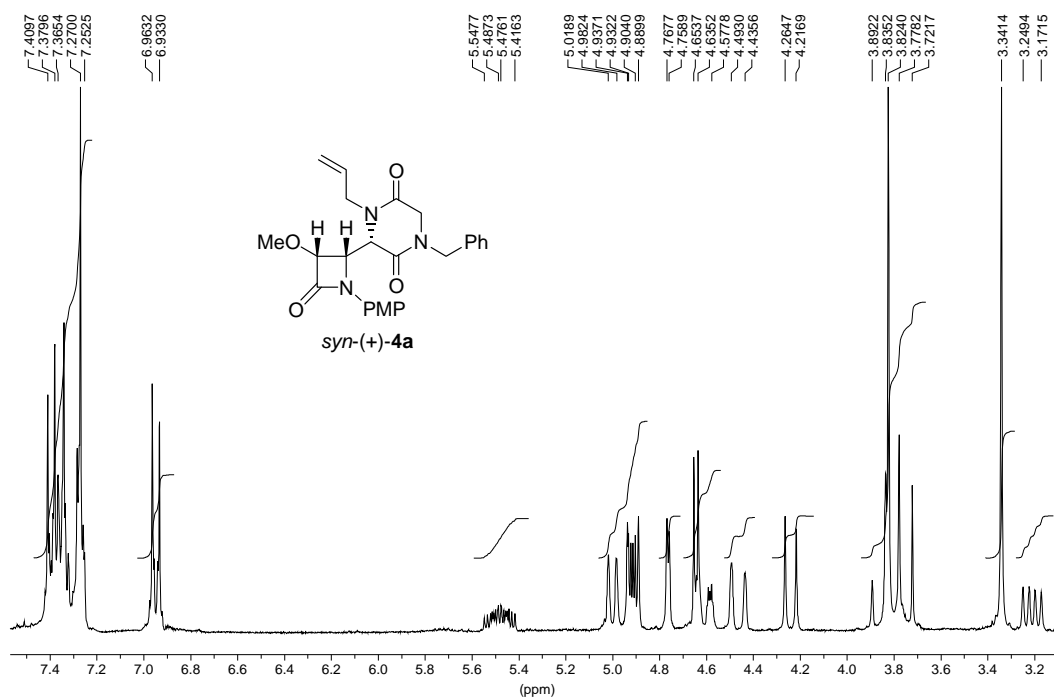

75 MHz (CDCl<sub>3</sub>, 25°C)

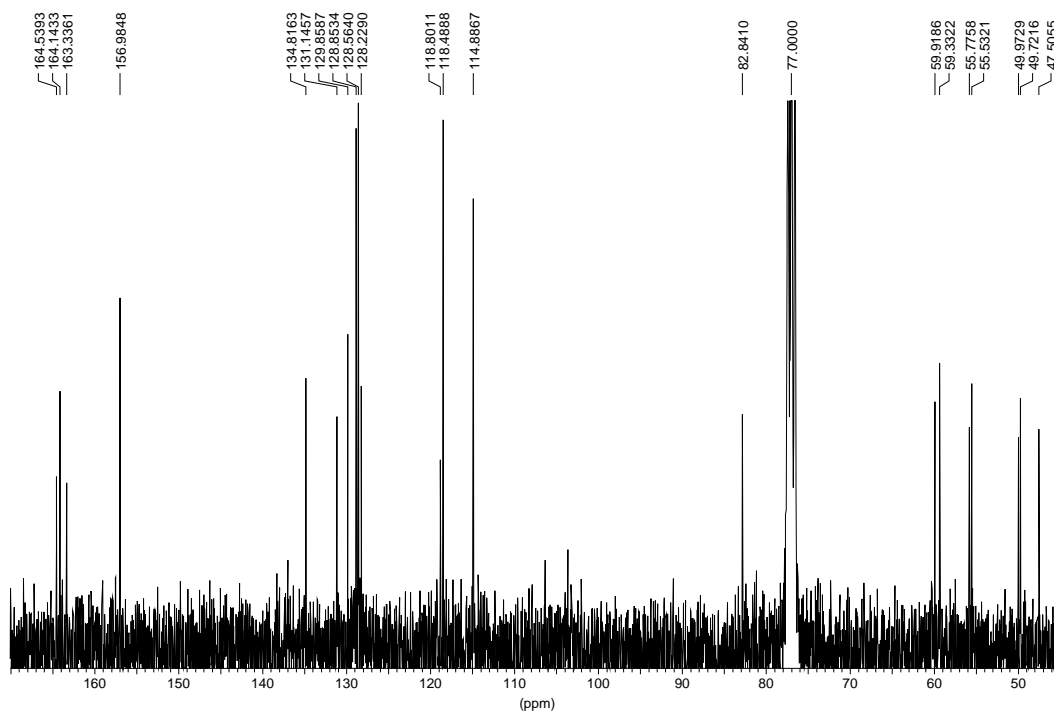

300 MHz (CDCl<sub>3</sub>, 25°C)

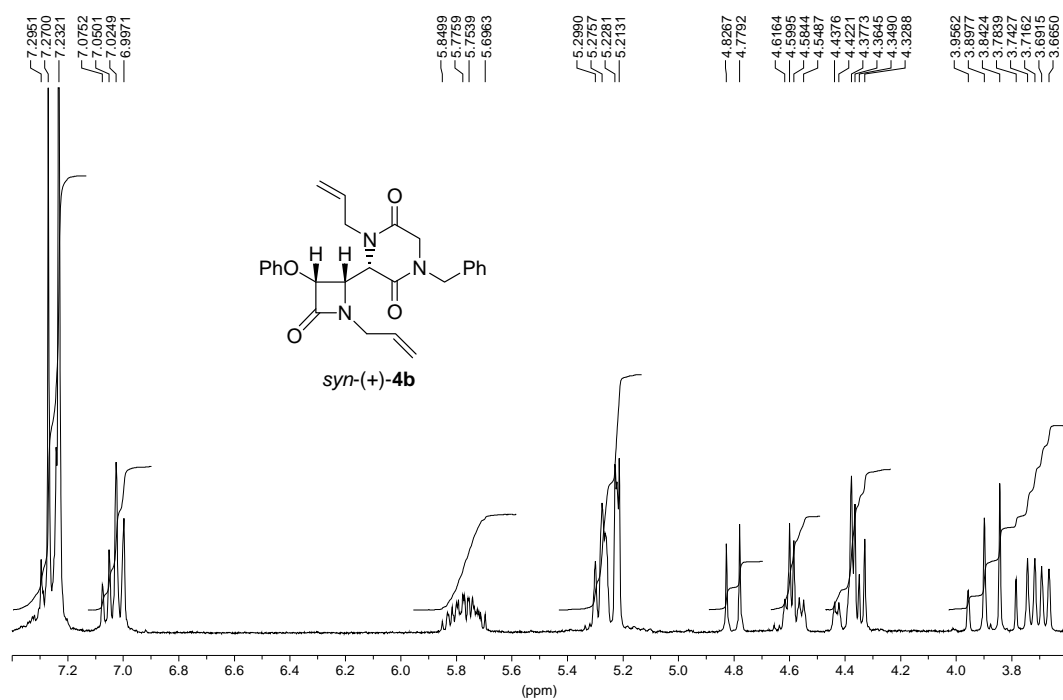

75 MHz (CDCl<sub>3</sub>, 25°C)

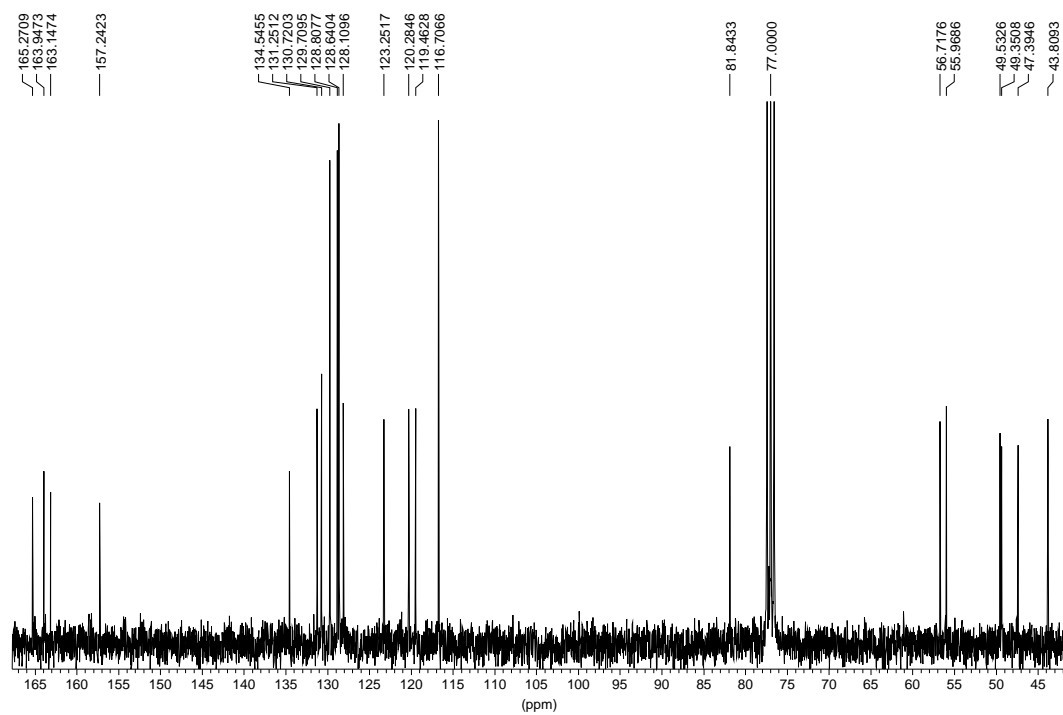

300 MHz (CDCl<sub>3</sub>, 25°C)

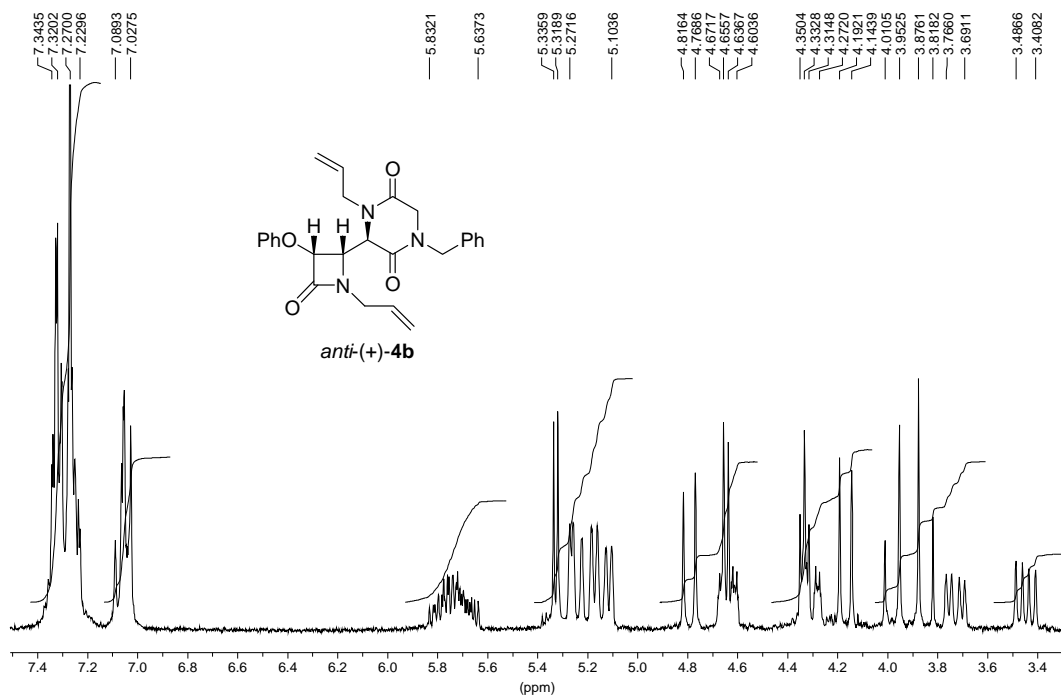

75 MHz (CDCl<sub>3</sub>, 25°C)

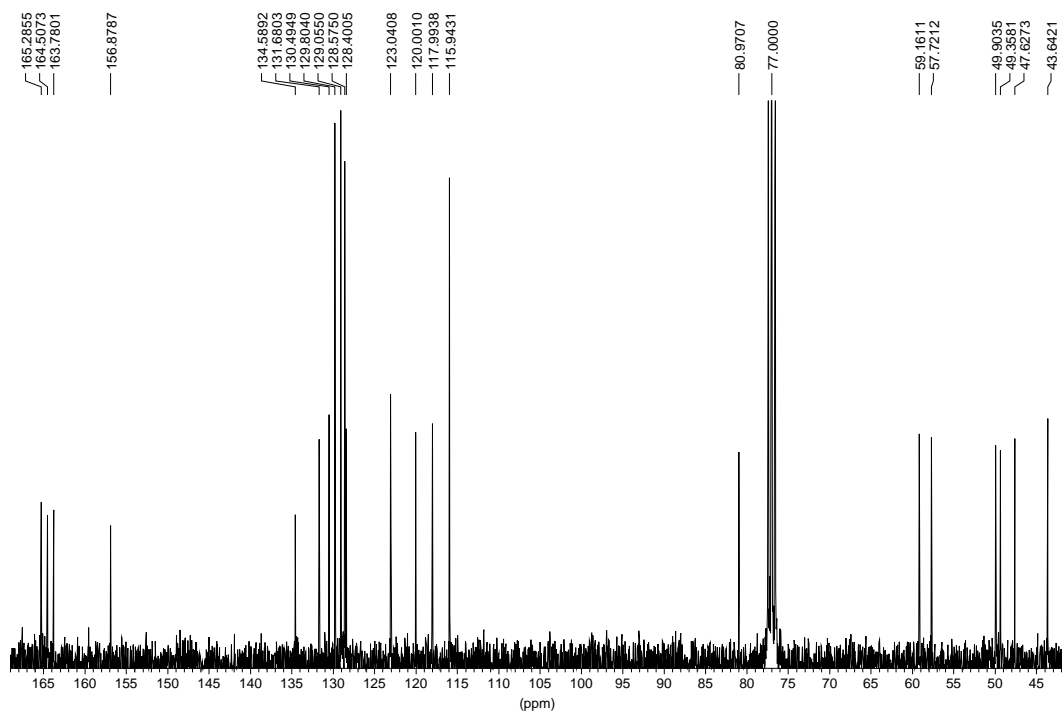



300 MHz (CDCl<sub>3</sub>, 25°C)

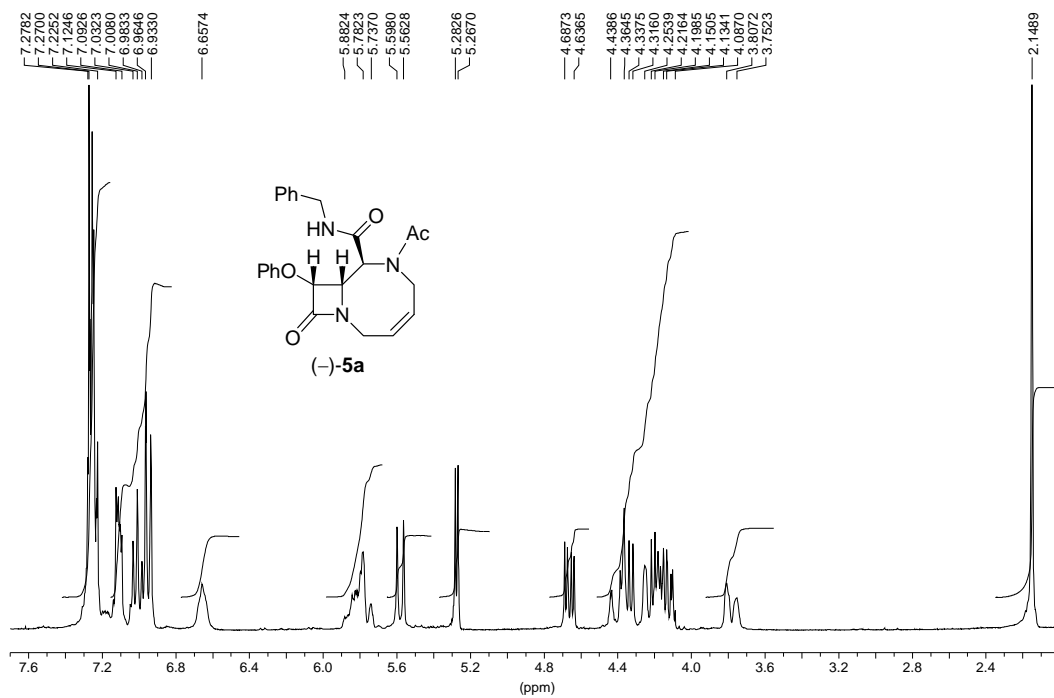

75 MHz (CDCl<sub>3</sub>, 25°C)

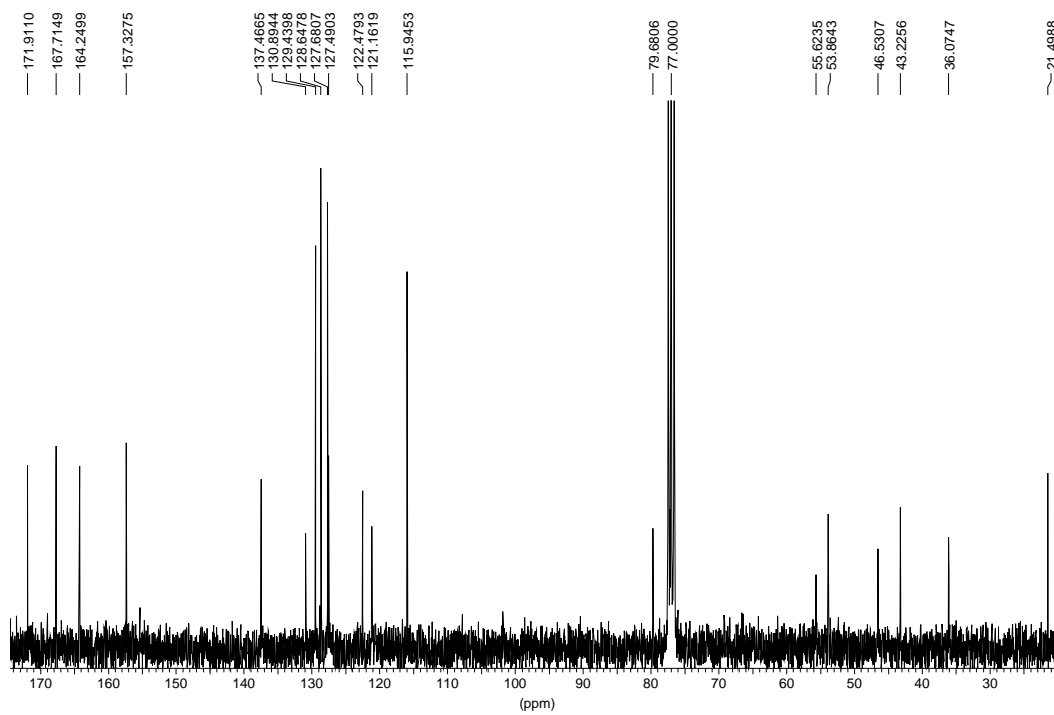

300 MHz (CDCl<sub>3</sub>, 25°C)

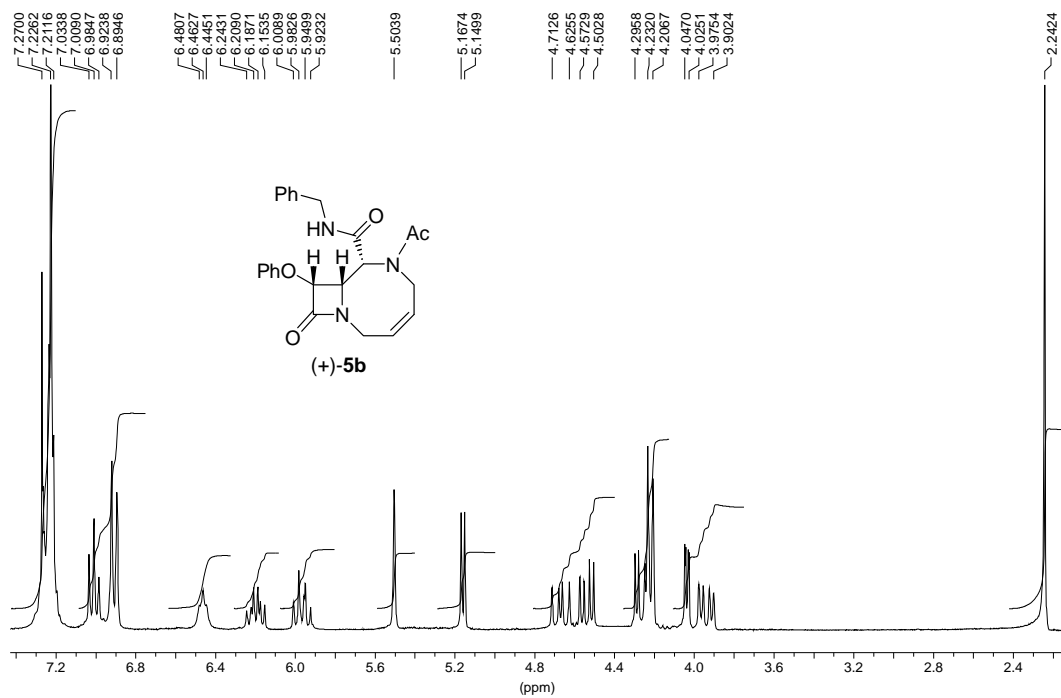

75 MHz (CDCl<sub>3</sub>, 25°C)

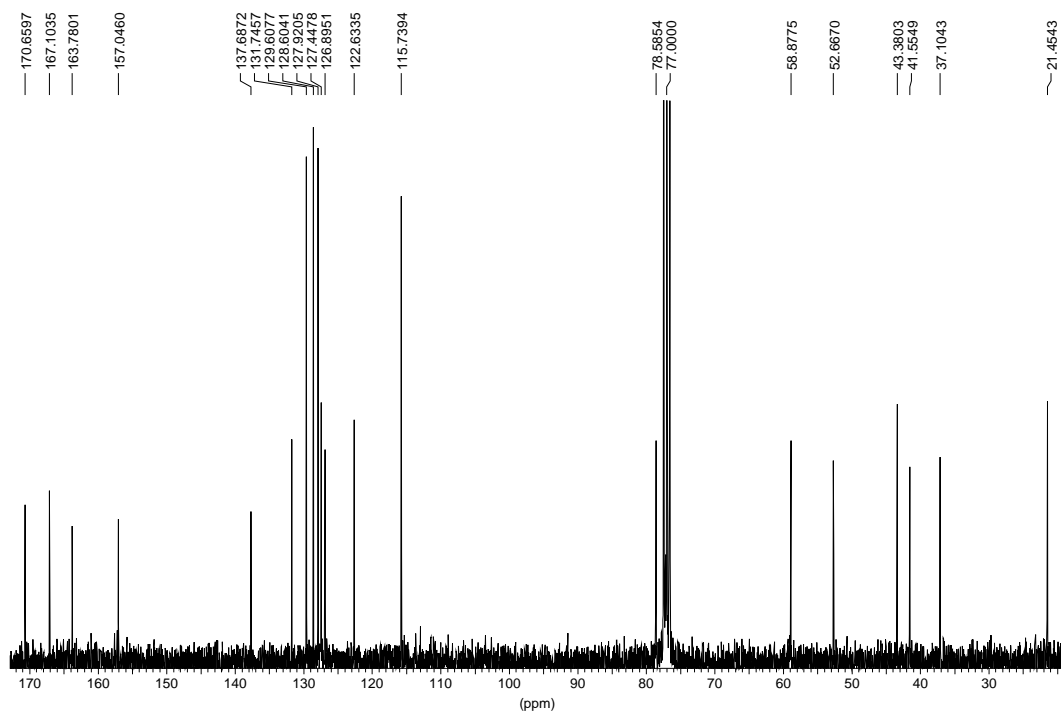

### X-Ray data for compound *anti*-(+)-2d

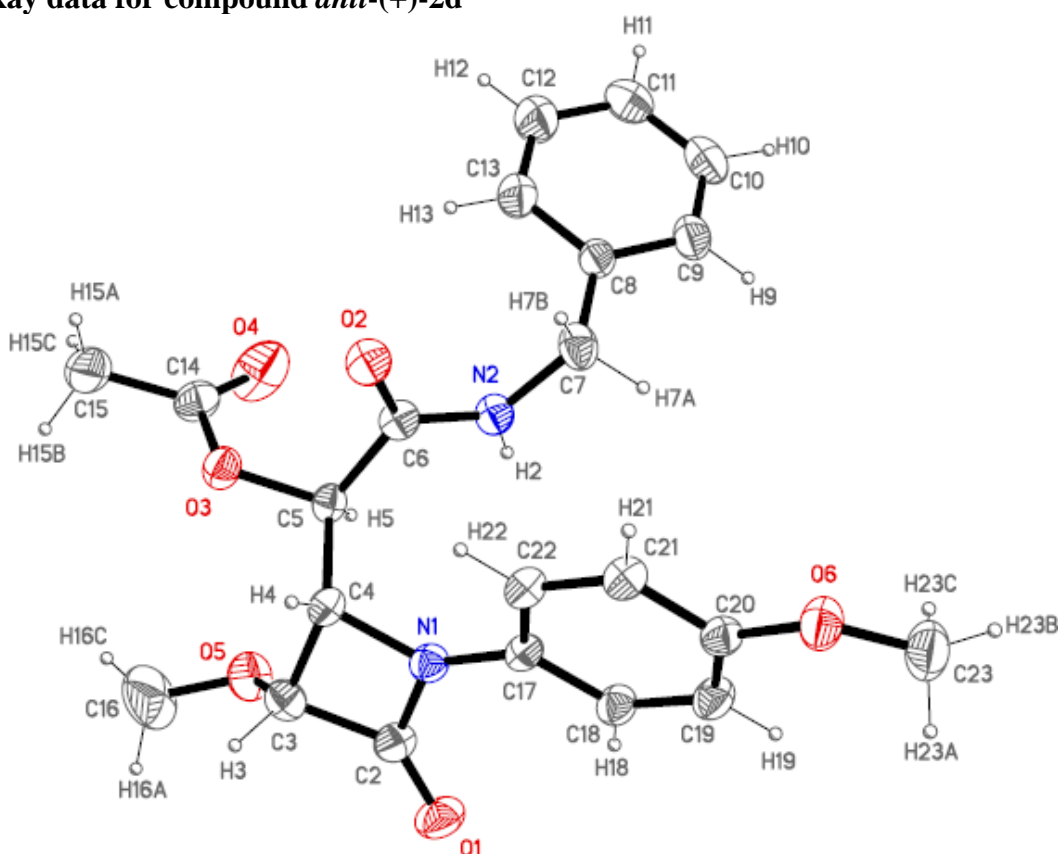

Table 1. Crystal data and structure refinement for C<sub>22</sub>H<sub>24</sub>N<sub>2</sub>O<sub>6</sub>.

|                                 |                                                               |          |
|---------------------------------|---------------------------------------------------------------|----------|
| Empirical formula               | C <sub>22</sub> H <sub>24</sub> N <sub>2</sub> O <sub>6</sub> |          |
| Formula weight                  | 412.43                                                        |          |
| Temperature                     | 296(2) K                                                      |          |
| Wavelength                      | 0.71073 Å                                                     |          |
| Crystal system                  | Orthorhombic                                                  |          |
| Space group                     | P2(1)2(1)2(1)                                                 |          |
| Unit cell dimensions            | a = 9.4466(14) Å                                              | α = 90°. |
|                                 | b = 12.1860(18) Å                                             | β = 90°. |
|                                 | c = 18.704(3) Å                                               | γ = 90°. |
| Volume                          | 2153.2(6) Å <sup>3</sup>                                      |          |
| Z                               | 4                                                             |          |
| Density (calculated)            | 1.272 Mg/m <sup>3</sup>                                       |          |
| Absorption coefficient          | 0.093 mm <sup>-1</sup>                                        |          |
| F(000)                          | 872                                                           |          |
| Crystal size                    | 0.56 x 0.18 x 0.09 mm <sup>3</sup>                            |          |
| Theta range for data collection | 1.99 to 26.00°.                                               |          |
| Index ranges                    | -11 ≤ h ≤ 11, -15 ≤ k ≤ 14, -21 ≤ l ≤ 23                      |          |
| Reflections collected           | 17599                                                         |          |

|                                   |                                             |
|-----------------------------------|---------------------------------------------|
| Independent reflections           | 4213 [R(int) = 0.0822]                      |
| Completeness to theta = 26.00°    | 99.8 %                                      |
| Refinement method                 | Full-matrix least-squares on F <sup>2</sup> |
| Data / restraints / parameters    | 4213 / 0 / 272                              |
| Goodness-of-fit on F <sup>2</sup> | 0.994                                       |
| Final R indices [I>2sigma(I)]     | R1 = 0.0526, wR2 = 0.1280                   |
| R indices (all data)              | R1 = 0.1557, wR2 = 0.1747                   |
| Absolute structure parameter      | 0(2)                                        |
| Extinction coefficient            | 0.0094(18)                                  |
| Largest diff. peak and hole       | 0.278 and -0.155 e.Å <sup>-3</sup>          |

Table 2. Atomic coordinates ( $\times 10^4$ ) and equivalent isotropic displacement parameters ( $\text{\AA}^2 \times 10^3$ ) for C<sub>22</sub>H<sub>24</sub>N<sub>2</sub>O<sub>6</sub>. U(eq) is defined as one third of the trace of the orthogonalized  $U^{ij}$  tensor.

|       | x       | y       | z        | U(eq)  |
|-------|---------|---------|----------|--------|
| N(2)  | 5484(4) | 2866(3) | -417(2)  | 60(1)  |
| C(2)  | 6255(6) | 4044(4) | 1765(3)  | 67(1)  |
| C(3)  | 5537(5) | 3007(4) | 2004(2)  | 68(1)  |
| C(4)  | 4695(5) | 3073(3) | 1295(2)  | 56(1)  |
| C(5)  | 5008(4) | 2175(3) | 762(2)   | 54(1)  |
| C(6)  | 4514(4) | 2448(3) | 11(2)    | 56(1)  |
| C(7)  | 5187(5) | 3278(4) | -1129(2) | 74(1)  |
| C(8)  | 5723(5) | 2554(4) | -1709(2) | 64(1)  |
| C(9)  | 6550(5) | 2947(5) | -2254(3) | 79(2)  |
| C(10) | 7033(6) | 2277(6) | -2793(3) | 90(2)  |
| C(11) | 6674(7) | 1195(6) | -2805(3) | 109(2) |
| C(12) | 5855(8) | 794(5)  | -2263(3) | 118(2) |
| C(13) | 5390(6) | 1443(4) | -1723(3) | 91(2)  |
| C(14) | 4586(6) | 264(4)  | 803(3)   | 76(1)  |
| C(15) | 3709(7) | -621(4) | 1097(3)  | 102(2) |
| C(16) | 6002(9) | 1442(6) | 2677(3)  | 162(3) |
| C(17) | 5173(5) | 4990(3) | 690(2)   | 55(1)  |
| C(18) | 6169(5) | 5799(3) | 594(2)   | 63(1)  |
| C(19) | 5906(5) | 6669(4) | 148(2)   | 70(1)  |
| C(20) | 4639(5) | 6750(3) | -203(2)  | 60(1)  |
| C(21) | 3632(5) | 5936(4) | -116(2)  | 60(1)  |
| C(22) | 3894(5) | 5062(3) | 331(2)   | 59(1)  |
| C(23) | 5347(7) | 8267(5) | -926(3)  | 107(2) |
| N(1)  | 5446(4) | 4109(3) | 1163(2)  | 59(1)  |
| O(6)  | 4255(4) | 7595(2) | -647(2)  | 81(1)  |
| O(1)  | 7165(4) | 4656(3) | 2002(2)  | 93(1)  |
| O(2)  | 3265(3) | 2330(3) | -170(2)  | 73(1)  |
| O(3)  | 4196(3) | 1255(2) | 1026(2)  | 68(1)  |
| O(4)  | 5537(5) | 165(3)  | 377(3)   | 137(2) |
| O(5)  | 6391(4) | 2095(3) | 2113(2)  | 86(1)  |

Table 3. Bond lengths [ $\text{\AA}$ ] and angles [ $^\circ$ ] for C<sub>22</sub>H<sub>24</sub>N<sub>2</sub>O<sub>6</sub>.

---

|              |          |
|--------------|----------|
| N(2)-C(6)    | 1.319(5) |
| N(2)-C(7)    | 1.452(5) |
| N(2)-H(2)    | 0.8600   |
| C(2)-O(1)    | 1.221(5) |
| C(2)-N(1)    | 1.362(6) |
| C(2)-C(3)    | 1.502(6) |
| C(3)-O(5)    | 1.388(5) |
| C(3)-C(4)    | 1.549(6) |
| C(3)-H(3)    | 0.9800   |
| C(4)-N(1)    | 1.468(5) |
| C(4)-C(5)    | 1.510(5) |
| C(4)-H(4)    | 0.9800   |
| C(5)-O(3)    | 1.445(4) |
| C(5)-C(6)    | 1.517(6) |
| C(5)-H(5)    | 0.9800   |
| C(6)-O(2)    | 1.236(5) |
| C(7)-C(8)    | 1.486(6) |
| C(7)-H(7A)   | 0.9700   |
| C(7)-H(7B)   | 0.9700   |
| C(8)-C(13)   | 1.391(6) |
| C(8)-C(9)    | 1.371(6) |
| C(9)-C(10)   | 1.374(7) |
| C(9)-H(9)    | 0.9300   |
| C(10)-C(11)  | 1.362(7) |
| C(10)-H(10)  | 0.9300   |
| C(11)-C(12)  | 1.365(8) |
| C(11)-H(11)  | 0.9300   |
| C(12)-C(13)  | 1.357(7) |
| C(12)-H(12)  | 0.9300   |
| C(13)-H(13)  | 0.9300   |
| C(14)-O(4)   | 1.207(6) |
| C(14)-O(3)   | 1.330(5) |
| C(14)-C(15)  | 1.467(7) |
| C(15)-H(15A) | 0.9600   |
| C(15)-H(15B) | 0.9600   |
| C(15)-H(15C) | 0.9600   |

|                |          |
|----------------|----------|
| C(16)-O(5)     | 1.372(6) |
| C(16)-H(16A)   | 0.9600   |
| C(16)-H(16B)   | 0.9600   |
| C(16)-H(16C)   | 0.9600   |
| C(17)-C(18)    | 1.375(5) |
| C(17)-C(22)    | 1.385(6) |
| C(17)-N(1)     | 1.415(5) |
| C(18)-C(19)    | 1.371(6) |
| C(18)-H(18)    | 0.9300   |
| C(19)-C(20)    | 1.369(6) |
| C(19)-H(19)    | 0.9300   |
| C(20)-O(6)     | 1.372(5) |
| C(20)-C(21)    | 1.384(6) |
| C(21)-C(22)    | 1.377(5) |
| C(21)-H(21)    | 0.9300   |
| C(22)-H(22)    | 0.9300   |
| C(23)-O(6)     | 1.417(6) |
| C(23)-H(23A)   | 0.9600   |
| C(23)-H(23B)   | 0.9600   |
| C(23)-H(23C)   | 0.9600   |
|                |          |
| C(6)-N(2)-C(7) | 123.8(4) |
| C(6)-N(2)-H(2) | 118.1    |
| C(7)-N(2)-H(2) | 118.1    |
| O(1)-C(2)-N(1) | 131.2(5) |
| O(1)-C(2)-C(3) | 136.3(5) |
| N(1)-C(2)-C(3) | 92.4(4)  |
| O(5)-C(3)-C(2) | 117.0(4) |
| O(5)-C(3)-C(4) | 117.7(4) |
| C(2)-C(3)-C(4) | 86.1(3)  |
| O(5)-C(3)-H(3) | 111.2    |
| C(2)-C(3)-H(3) | 111.2    |
| C(4)-C(3)-H(3) | 111.2    |
| N(1)-C(4)-C(5) | 114.7(3) |
| N(1)-C(4)-C(3) | 86.6(3)  |
| C(5)-C(4)-C(3) | 115.3(3) |
| N(1)-C(4)-H(4) | 112.6    |
| C(5)-C(4)-H(4) | 112.6    |

|                    |          |
|--------------------|----------|
| C(3)-C(4)-H(4)     | 112.6    |
| O(3)-C(5)-C(6)     | 108.8(3) |
| O(3)-C(5)-C(4)     | 103.5(3) |
| C(6)-C(5)-C(4)     | 113.1(3) |
| O(3)-C(5)-H(5)     | 110.4    |
| C(6)-C(5)-H(5)     | 110.4    |
| C(4)-C(5)-H(5)     | 110.4    |
| O(2)-C(6)-N(2)     | 122.8(4) |
| O(2)-C(6)-C(5)     | 121.4(4) |
| N(2)-C(6)-C(5)     | 115.7(4) |
| N(2)-C(7)-C(8)     | 113.4(4) |
| N(2)-C(7)-H(7A)    | 108.9    |
| C(8)-C(7)-H(7A)    | 108.9    |
| N(2)-C(7)-H(7B)    | 108.9    |
| C(8)-C(7)-H(7B)    | 108.9    |
| H(7A)-C(7)-H(7B)   | 107.7    |
| C(13)-C(8)-C(9)    | 117.0(5) |
| C(13)-C(8)-C(7)    | 121.0(4) |
| C(9)-C(8)-C(7)     | 122.0(5) |
| C(10)-C(9)-C(8)    | 121.8(5) |
| C(10)-C(9)-H(9)    | 119.1    |
| C(8)-C(9)-H(9)     | 119.1    |
| C(9)-C(10)-C(11)   | 120.3(6) |
| C(9)-C(10)-H(10)   | 119.9    |
| C(11)-C(10)-H(10)  | 119.9    |
| C(12)-C(11)-C(10)  | 118.4(6) |
| C(12)-C(11)-H(11)  | 120.8    |
| C(10)-C(11)-H(11)  | 120.8    |
| C(11)-C(12)-C(13)  | 121.8(6) |
| C(11)-C(12)-H(12)  | 119.1    |
| C(13)-C(12)-H(12)  | 119.1    |
| C(12)-C(13)-C(8)   | 120.6(5) |
| C(12)-C(13)-H(13)  | 119.7    |
| C(8)-C(13)-H(13)   | 119.7    |
| O(4)-C(14)-O(3)    | 120.3(5) |
| O(4)-C(14)-C(15)   | 126.5(5) |
| O(3)-C(14)-C(15)   | 113.2(5) |
| C(14)-C(15)-H(15A) | 109.5    |



|                     |          |
|---------------------|----------|
| C(14)-C(15)-H(15B)  | 109.5    |
| H(15A)-C(15)-H(15B) | 109.5    |
| C(14)-C(15)-H(15C)  | 109.5    |
| H(15A)-C(15)-H(15C) | 109.5    |
| H(15B)-C(15)-H(15C) | 109.5    |
| O(5)-C(16)-H(16A)   | 109.5    |
| O(5)-C(16)-H(16B)   | 109.5    |
| H(16A)-C(16)-H(16B) | 109.5    |
| O(5)-C(16)-H(16C)   | 109.5    |
| H(16A)-C(16)-H(16C) | 109.5    |
| H(16B)-C(16)-H(16C) | 109.5    |
| C(18)-C(17)-C(22)   | 119.2(4) |
| C(18)-C(17)-N(1)    | 120.1(4) |
| C(22)-C(17)-N(1)    | 120.7(4) |
| C(17)-C(18)-C(19)   | 120.7(4) |
| C(17)-C(18)-H(18)   | 119.6    |
| C(19)-C(18)-H(18)   | 119.6    |
| C(20)-C(19)-C(18)   | 120.4(4) |
| C(20)-C(19)-H(19)   | 119.8    |
| C(18)-C(19)-H(19)   | 119.8    |
| C(19)-C(20)-O(6)    | 125.2(4) |
| C(19)-C(20)-C(21)   | 119.5(4) |
| O(6)-C(20)-C(21)    | 115.3(4) |
| C(22)-C(21)-C(20)   | 120.2(4) |
| C(22)-C(21)-H(21)   | 119.9    |
| C(20)-C(21)-H(21)   | 119.9    |
| C(21)-C(22)-C(17)   | 120.0(4) |
| C(21)-C(22)-H(22)   | 120.0    |
| C(17)-C(22)-H(22)   | 120.0    |
| O(6)-C(23)-H(23A)   | 109.5    |
| O(6)-C(23)-H(23B)   | 109.5    |
| H(23A)-C(23)-H(23B) | 109.5    |
| O(6)-C(23)-H(23C)   | 109.5    |
| H(23A)-C(23)-H(23C) | 109.5    |
| H(23B)-C(23)-H(23C) | 109.5    |
| C(2)-N(1)-C(17)     | 131.5(4) |
| C(2)-N(1)-C(4)      | 94.7(3)  |
| C(17)-N(1)-C(4)     | 132.0(4) |

C(20)-O(6)-C(23) 117.7(4)

C(14)-O(3)-C(5) 116.7(4)

C(3)-O(5)-C(16) 114.9(4)

---

Symmetry transformations used to generate equivalent atoms:

Table 4. Anisotropic displacement parameters ( $\text{\AA}^2 \times 10^3$ ) for C<sub>22</sub>H<sub>24</sub>N<sub>2</sub>O<sub>6</sub>. The anisotropic displacement factor exponent takes the form:  $-2\pi^2 [ h^2 a^{*2} U^{11} + \dots + 2 h k a^* b^* U^{12} ]$

|       | U <sup>11</sup> | U <sup>22</sup> | U <sup>33</sup> | U <sup>23</sup> | U <sup>13</sup> | U <sup>12</sup> |
|-------|-----------------|-----------------|-----------------|-----------------|-----------------|-----------------|
| N(2)  | 43(2)           | 71(2)           | 65(2)           | 4(2)            | 0(2)            | -1(2)           |
| C(2)  | 68(3)           | 61(3)           | 72(3)           | -3(3)           | -9(3)           | -1(3)           |
| C(3)  | 70(3)           | 71(3)           | 63(3)           | 1(2)            | 1(3)            | 8(3)            |
| C(4)  | 50(3)           | 52(2)           | 67(3)           | 1(2)            | -1(2)           | -7(2)           |
| C(5)  | 50(2)           | 50(2)           | 61(3)           | 3(2)            | 6(2)            | -1(2)           |
| C(6)  | 38(3)           | 62(3)           | 68(3)           | -4(2)           | 4(2)            | 6(2)            |
| C(7)  | 66(3)           | 83(3)           | 72(3)           | 22(3)           | -5(3)           | 0(3)            |
| C(8)  | 56(3)           | 78(3)           | 59(3)           | 10(2)           | -6(2)           | -14(3)          |
| C(9)  | 70(3)           | 94(4)           | 73(3)           | 24(3)           | -8(3)           | -13(3)          |
| C(10) | 75(4)           | 130(6)          | 65(4)           | 19(4)           | 3(3)            | 3(4)            |
| C(11) | 135(6)          | 122(6)          | 69(4)           | -14(4)          | 11(4)           | -7(5)           |
| C(12) | 164(7)          | 100(4)          | 89(4)           | -6(4)           | 22(5)           | -29(5)          |
| C(13) | 114(5)          | 83(4)           | 76(4)           | -1(3)           | 17(3)           | -21(4)          |
| C(14) | 85(4)           | 56(3)           | 88(4)           | -11(3)          | -4(3)           | 5(3)            |
| C(15) | 149(6)          | 62(3)           | 95(4)           | 10(3)           | -15(4)          | -12(4)          |
| C(16) | 254(10)         | 121(5)          | 111(5)          | 54(4)           | -2(6)           | 29(7)           |
| C(17) | 54(3)           | 47(2)           | 62(3)           | -5(2)           | 1(2)            | -4(2)           |
| C(18) | 56(3)           | 64(3)           | 69(3)           | 4(2)            | -9(2)           | -11(3)          |
| C(19) | 63(3)           | 65(3)           | 80(3)           | -2(3)           | -1(3)           | -17(3)          |
| C(20) | 65(3)           | 52(3)           | 62(3)           | -5(2)           | 2(3)            | 1(3)            |
| C(21) | 49(3)           | 59(3)           | 72(3)           | -2(2)           | -3(2)           | 2(2)            |
| C(22) | 55(3)           | 51(3)           | 72(3)           | -2(2)           | -2(2)           | -4(2)           |
| C(23) | 113(5)          | 99(4)           | 108(4)          | 31(3)           | -8(4)           | -33(4)          |
| N(1)  | 55(2)           | 60(2)           | 62(2)           | 1(2)            | -5(2)           | -4(2)           |
| O(6)  | 81(2)           | 71(2)           | 90(2)           | 18(2)           | -7(2)           | -8(2)           |
| O(1)  | 96(3)           | 85(3)           | 98(3)           | -7(2)           | -33(2)          | -21(2)          |
| O(2)  | 42(2)           | 95(2)           | 82(2)           | 6(2)            | -5(2)           | -3(2)           |
| O(3)  | 71(2)           | 56(2)           | 77(2)           | 1(2)            | 9(2)            | -3(2)           |
| O(4)  | 114(3)          | 88(3)           | 208(5)          | -41(3)          | 54(4)           | 10(3)           |
| O(5)  | 86(2)           | 81(2)           | 91(2)           | 16(2)           | -5(2)           | 13(2)           |

Table 5. Hydrogen coordinates ( $\times 10^4$ ) and isotropic displacement parameters ( $\text{\AA}^2 \times 10^3$ ) for C<sub>22</sub>H<sub>24</sub>N<sub>2</sub>O<sub>6</sub>.

|        | x    | y     | z     | U(eq) |
|--------|------|-------|-------|-------|
| H(2)   | 6342 | 2895  | -265  | 72    |
| H(3)   | 4922 | 3141  | 2417  | 81    |
| H(4)   | 3678 | 3180  | 1372  | 68    |
| H(5)   | 6020 | 1999  | 763   | 64    |
| H(7A)  | 5613 | 3998  | -1180 | 89    |
| H(7B)  | 4172 | 3363  | -1183 | 89    |
| H(9)   | 6790 | 3687  | -2260 | 95    |
| H(10)  | 7609 | 2564  | -3150 | 108   |
| H(11)  | 6978 | 741   | -3173 | 130   |
| H(12)  | 5608 | 55    | -2265 | 141   |
| H(13)  | 4844 | 1142  | -1358 | 109   |
| H(15A) | 2818 | -641  | 851   | 153   |
| H(15B) | 3550 | -491  | 1597  | 153   |
| H(15C) | 4187 | -1310 | 1036  | 153   |
| H(16A) | 6019 | 1864  | 3110  | 243   |
| H(16B) | 6652 | 839   | 2717  | 243   |
| H(16C) | 5064 | 1165  | 2598  | 243   |
| H(18)  | 7030 | 5756  | 833   | 76    |
| H(19)  | 6593 | 7207  | 84    | 83    |
| H(21)  | 2776 | 5979  | -360  | 72    |
| H(22)  | 3212 | 4519  | 392   | 71    |
| H(23A) | 5783 | 8670  | -544  | 160   |
| H(23B) | 4955 | 8771  | -1267 | 160   |
| H(23C) | 6044 | 7816  | -1157 | 160   |

Table 6. Torsion angles [°] for C<sub>22</sub>H<sub>24</sub>N<sub>2</sub>O<sub>6</sub>.

---

|                         |           |
|-------------------------|-----------|
| O(1)-C(2)-C(3)-O(5)     | -60.6(7)  |
| N(1)-C(2)-C(3)-O(5)     | 122.2(4)  |
| O(1)-C(2)-C(3)-C(4)     | -179.8(6) |
| N(1)-C(2)-C(3)-C(4)     | 2.9(3)    |
| O(5)-C(3)-C(4)-N(1)     | -121.3(4) |
| C(2)-C(3)-C(4)-N(1)     | -2.7(3)   |
| O(5)-C(3)-C(4)-C(5)     | -5.5(6)   |
| C(2)-C(3)-C(4)-C(5)     | 113.1(4)  |
| N(1)-C(4)-C(5)-O(3)     | 177.9(3)  |
| C(3)-C(4)-C(5)-O(3)     | 79.5(4)   |
| N(1)-C(4)-C(5)-C(6)     | -64.5(5)  |
| C(3)-C(4)-C(5)-C(6)     | -162.9(4) |
| C(7)-N(2)-C(6)-O(2)     | 3.0(6)    |
| C(7)-N(2)-C(6)-C(5)     | -173.7(4) |
| O(3)-C(5)-C(6)-O(2)     | 33.7(5)   |
| C(4)-C(5)-C(6)-O(2)     | -80.7(5)  |
| O(3)-C(5)-C(6)-N(2)     | -149.6(3) |
| C(4)-C(5)-C(6)-N(2)     | 96.0(4)   |
| C(6)-N(2)-C(7)-C(8)     | -107.4(5) |
| N(2)-C(7)-C(8)-C(13)    | 52.3(6)   |
| N(2)-C(7)-C(8)-C(9)     | -128.4(5) |
| C(13)-C(8)-C(9)-C(10)   | -0.1(7)   |
| C(7)-C(8)-C(9)-C(10)    | -179.4(4) |
| C(8)-C(9)-C(10)-C(11)   | 1.3(8)    |
| C(9)-C(10)-C(11)-C(12)  | -1.5(9)   |
| C(10)-C(11)-C(12)-C(13) | 0.4(10)   |
| C(11)-C(12)-C(13)-C(8)  | 0.9(10)   |
| C(9)-C(8)-C(13)-C(12)   | -1.0(8)   |
| C(7)-C(8)-C(13)-C(12)   | 178.3(5)  |
| C(22)-C(17)-C(18)-C(19) | 0.0(6)    |
| N(1)-C(17)-C(18)-C(19)  | -178.7(4) |
| C(17)-C(18)-C(19)-C(20) | 0.7(7)    |
| C(18)-C(19)-C(20)-O(6)  | 178.4(4)  |
| C(18)-C(19)-C(20)-C(21) | -1.3(7)   |
| C(19)-C(20)-C(21)-C(22) | 1.2(6)    |
| O(6)-C(20)-C(21)-C(22)  | -178.5(4) |

|                         |           |
|-------------------------|-----------|
| C(20)-C(21)-C(22)-C(17) | -0.6(6)   |
| C(18)-C(17)-C(22)-C(21) | 0.0(6)    |
| N(1)-C(17)-C(22)-C(21)  | 178.6(4)  |
| O(1)-C(2)-N(1)-C(17)    | -14.7(8)  |
| C(3)-C(2)-N(1)-C(17)    | 162.8(4)  |
| O(1)-C(2)-N(1)-C(4)     | 179.4(5)  |
| C(3)-C(2)-N(1)-C(4)     | -3.1(3)   |
| C(18)-C(17)-N(1)-C(2)   | 29.1(7)   |
| C(22)-C(17)-N(1)-C(2)   | -149.6(5) |
| C(18)-C(17)-N(1)-C(4)   | -170.0(4) |
| C(22)-C(17)-N(1)-C(4)   | 11.3(7)   |
| C(5)-C(4)-N(1)-C(2)     | -113.3(4) |
| C(3)-C(4)-N(1)-C(2)     | 3.0(3)    |
| C(5)-C(4)-N(1)-C(17)    | 80.9(5)   |
| C(3)-C(4)-N(1)-C(17)    | -162.8(4) |
| C(19)-C(20)-O(6)-C(23)  | 18.8(6)   |
| C(21)-C(20)-O(6)-C(23)  | -161.6(4) |
| O(4)-C(14)-O(3)-C(5)    | -3.1(7)   |
| C(15)-C(14)-O(3)-C(5)   | 179.9(4)  |
| C(6)-C(5)-O(3)-C(14)    | 79.7(4)   |
| C(4)-C(5)-O(3)-C(14)    | -159.8(4) |
| C(2)-C(3)-O(5)-C(16)    | 143.2(5)  |
| C(4)-C(3)-O(5)-C(16)    | -116.3(5) |

---

Symmetry transformations used to generate equivalent atoms:
